# Supplementary material for: Max Planck Institute Earth System Model (MPI-ESM1.2) for High-Resolution Model Intercomparison Project (HighResMIP)
Source: Copernicus journal article supplement (doi:10.5194/gmd-2018-286), 2018-12-17
Supplement: Supplementary file [file gmd-2018-286-AC1-supplement.pdf]

# Max Planck Institute Earth System Model (MPI-ESM1.2) for High-Resolution Model Intercomparison Project (HighResMIP)

Oliver Gutjahr<sup>1</sup>, Dian Putrahasan<sup>1</sup>, Katja Lohmann<sup>1</sup>, Johann H. Jungclaus<sup>1</sup>, Jin-Song von Storch<sup>1</sup>, Nils Brüggemann<sup>1,2</sup>, Helmuth Haak<sup>1</sup>, and Achim Stössel<sup>3</sup>

<sup>1</sup>Max Planck Institute for Meteorology, Hamburg, Germany

<sup>2</sup>University of Hamburg, Hamburg, Germany

<sup>3</sup>Department of Oceanography, Texas A&M University, College Station, Texas, USA

**Correspondence:** O. Gutjahr (oliver.gutjahr@mpimet.mpg.de)

**Abstract.** As a contribution towards improving the climate mean state of the atmosphere and the ocean in Earth System Models (ESMs), we compare several coupled simulations conducted with the Max Planck Institute for Meteorology Earth System Model (MPI-ESM1.2) following the HighResMIP protocol. Our simulations allow to analyse the separate effects of increasing the horizontal resolution of the ocean (0.4° to 0.1°) and atmosphere (T127 to T255) submodels, and the effects of substituting the Pacanowski and Philander (PP) vertical ocean mixing scheme with the K-Profile Parameterization (KPP).

The results show clearly distinguishable effects from all three factors. The eddy-resolving ocean removes biases in the ocean interior and in the atmosphere. This leads to <sup>[..<sup>1</sup>]</sup>the important conclusion that <sup>[..<sup>2</sup>]</sup>an eddy-resolving ocean has a major impact on the <sup>[..<sup>3</sup>]</sup>mean state of the ocean and the atmosphere. The T255 atmosphere <sup>[..<sup>4</sup>]</sup>reduces the surface wind stress and improves ocean mixed layer depths in both hemisphere. The reduced wind forcing<sup>[..<sup>4</sup>]</sup>, <sup>[..<sup>5</sup>]</sup>in turn, slows the Antarctic Circumpolar Current (ACC) <sup>[..<sup>5</sup>]</sup>reducing it to observed values. In the North Atlantic, however, <sup>[..<sup>6</sup>]</sup>the reduced surface wind causes a weakening of the subpolar gyre and thus a slowing down of the Atlantic Meridional Overturning Circulation (AMOC)<sup>[..<sup>7</sup>]</sup>, when the PP scheme is used. The KPP scheme, <sup>[..<sup>8</sup>]</sup>on the other hand, causes stronger open-ocean convection <sup>[..<sup>8</sup>]</sup>which spins up the <sup>[..<sup>9</sup>]</sup>subpolar gyres, ultimately leading to a stronger and stable AMOC, <sup>[..<sup>10</sup>]</sup>even when coupled to the T255 atmosphere, <sup>[..<sup>10</sup>]</sup>thus retaining all the positive effects of a higher resolved atmosphere.

15 *Copyright statement.* TEXT

---

<sup>1</sup>removed: an

<sup>2</sup>removed: ocean eddies have

<sup>3</sup>removed: large-scale temperature distribution in the atmosphere, and on temperature and salinity distributions in the ocean. The near-surface wind forcing reduces with a

<sup>4</sup>removed: further

<sup>5</sup>removed: and reduces the transport through Drake Passage

<sup>6</sup>removed: it causes a slow

<sup>7</sup>removed: due to a slower subpolar gyre

<sup>8</sup>removed: that

<sup>9</sup>removed: gyres and leads

<sup>10</sup>removed: maintaining

## 1 Introduction

The evolving computational power allows for ever higher resolutions of earth system models (ESM). High resolution ESMs are able to explicitly resolve processes that are subgrid-scale and parameterized in low-resolution models. Optimally, <sup>[..<sup>11</sup>]</sup> better resolved processes <sup>[..<sup>12</sup>]</sup> would improve atmosphere and ocean dynamics and thus reduce biases in the mean state and in the variability of key quantities. In this manuscript<sup>[..<sup>13</sup>]</sup>, we separately increase the horizontal resolution of the <sup>[..<sup>14</sup>]</sup> atmosphere and ocean submodels and analyse the effects on the mean <sup>[..<sup>15</sup>]</sup> states. However, besides increasing the resolution of the major model subcomponents, new strategies and model developments, such as improved physics, are required for improving ESMs. Therefore, we also analyse the effects of a more sophisticated vertical mixing parameterization in the ocean submodel.

Specifically, this paper describes the adaptation of the Max Planck Institute - Earth System Model (MPI-ESM, Giorgetta et al., 2013) to higher horizontal resolutions and the implementation of improved ocean physics within the PRIMAVERA project (<https://www.primavera-h2020.eu/>). A key aspect of the project is on improving the simulation of the European climate, which is why we put a focus on the North Atlantic and the Atlantic Meridional Overturning circulation (AMOC). We investigate separately the effects of increasing <sup>[..<sup>16</sup>]</sup> horizontal resolution of the atmosphere and the ocean, and of exchanging the vertical mixing parameterization in the ocean and sea ice submodel MPIOM (Jungclaus et al., 2013).

All our simulations follow the High Resolution Model Intercomparison Project <sup>[..<sup>17</sup>]</sup> (HighResMIP) protocol (Haarsma et al., 2016) and provide climate simulations with varying horizontal resolutions that are higher than the standard resolution of the Coupled Model Intercomparison Project - Phase 6 (CMIP6; Eyring et al., 2016). [An overview of all performed simulations for this study is shown in Tab. 1.](#)

Our reference model is the MPI-ESM1.2-HR (or HR in the remainder of the manuscript) that was recently described by Müller et al. (2018) and contributes to CMIP6. HR is the higher resolution version of the former MPI-ESM1.2-LR (or LR), with <sup>[..<sup>18</sup>]</sup> twice as high (T127,  $\sim 100$  km) horizontal resolution for the atmospheric submodel ECHAM6.3 (Hertwig et al., 2015; Mauritsen et al., 2018) and a  $0.4^\circ$  ( $\sim 40$  km) ocean on <sup>[..<sup>19</sup>]</sup> an eddy-permitting tripolar grid (TP04) (Jungclaus et al., 2013) compared to the LR version (T63,  $\sim 200$  km atmosphere and  $1.5^\circ$  ocean grid). How the ocean and atmosphere mean states improve in HR compared to LR were described by Müller et al. (2018). Further reductions of atmospheric biases were shown by Hertwig et al. (2015), who used ECHAM6.3 with a T255 ( $\sim 50$  km) resolution in atmospheric model intercomparison project (AMIP) type experiments.

---

<sup>11</sup>removed: the

<sup>12</sup>removed: improve the

<sup>13</sup>removed: we analyse separately

<sup>14</sup>removed: effects of increasing the horizontal atmospheric and oceanic resolution

<sup>15</sup>removed: state

<sup>16</sup>removed: the

<sup>17</sup>removed: (HighResMIP; Haarsma et al., 2016) protocol

<sup>18</sup>removed: a

<sup>19</sup>removed: a

Building on these improvements, we further use a coupled MPI-ESM1.2 version with the T255 atmosphere and the TP04 ocean grid (MPI-ESM1.2-XR or simply XR) to investigate the effect of an increased atmospheric resolution on the mean state. This XR version was already used by Putrasahan et al. (2018) and (although under a different acronym) by Milinski et al. (2016). Milinski et al. (2016) demonstrated that the sea surface temperature bias in the upwelling regions along the coast of Africa diminished because of a more detailed representation of the coastal winds with the T255 atmosphere. Although biases were reduced with a T255 version of ECHAM6.3, our XR simulation generally produces too weak surface wind speeds, in particular <sup>[..<sup>20</sup>]</sup>over the North Atlantic and the subpolar gyre (Putrasahan et al., 2018).

These weaker near-surface winds caused a slowdown of the Atlantic Meridional Overturning Circulation (AMOC) to about 9Sv ( $\text{Sv} := 10^6 \text{m}^3 \text{s}^{-1}$ ), as documented by Putrasahan et al. (2018). This issue was not only affecting the MPI-ESM1.2, but was also reported by other modelling centres using ECHAM6, although going from T63 to T127 (Sein et al., 2018). Sein et al. (2018) gave a possible explanation for the reduction of mean wind speeds, which they attribute to a higher cyclone activity with the T127 resolution, in particular over the North Atlantic.

The AMOC strength and its stability depend to a large <sup>[..<sup>21</sup>]</sup>extend on the vertical mixing parameterization (Gent, 2018). To investigate the sensitivity of the AMOC <sup>[..<sup>22</sup>]</sup>and the mean states, we conducted parallel experiments with HR and XR in which the <sup>[..<sup>23</sup>]</sup>modified parameterization of Pacanowski and Philander (1981) (PP scheme), <sup>which is default in MPI-ESM1.2 (Marsland et al., 2003)</sup>, was replaced by the more sophisticated K-Profile Parameterization (KPP) scheme of Large et al. (1994). It turned out that the KPP scheme compensates for the underestimated mean winds in the high latitudes and in the tropics in the XR simulation, sustaining a stable AMOC. The reasons for this will be elaborated upon.

Finally, we adopt the  $0.1^\circ$  ( $\sim 11 \text{km}$ ) tripolar grid (TP6M) of MPIOM that was already used in an eddy-resolving ocean-only simulation forced by NCEP, and in a coupled run with T63 and T255 versions of ECHAM6 – the so-called STORM simulations (von Storch et al., 2012; Stössel et al., 2015, 2018). With this eddy-resolving coupled version (MPI-ESM1.2-ER or ER), we detect noticeable reductions of biases not only in the ocean and near-surface atmosphere, but also in the higher atmosphere. This leads to <sup>[..<sup>24</sup>]</sup>the important conclusion that <sup>[..<sup>25</sup>]</sup>an eddy-resolving ocean has a major impact on the large-scale temperature distribution in the atmosphere, consistent with recent findings (Frenger et al., 2013; Ma et al., 2016; Liu et al., 2018). The parallel simulations allow to separately analyse (1) the effects of <sup>[..<sup>26</sup>]</sup>increased atmospheric resolution (HR vs. XR), (2) the effects of increased ocean model resolution <sup>[..<sup>27</sup>]</sup>(HR vs. ER), and (3) the effect of an alternative vertical ocean mixing parameterizations (PP vs. KPP) on the mean climate.

We begin by describing the model configuration and spin-up procedure in section 2. In section 3 we present the results of the atmospheric mean state, <sup>[..<sup>28</sup>]</sup>including a description of reduced wind stress in XR. In section 4 we show the results of the

---

<sup>20</sup>removed: above

<sup>21</sup>removed: extent

<sup>22</sup>removed: , but also of

<sup>23</sup>removed: traditional

<sup>24</sup>removed: an

<sup>25</sup>removed: ocean eddies have

<sup>26</sup>removed: atmosphere and

<sup>27</sup>removed: , as well as

<sup>28</sup>removed: and in

ocean mean state, including the consequences of the reduced wind stress and how the KPP scheme sustains the AMOC. In section 5 we summarize all results and contrast the effects from increased resolution to improved ocean mixing.

## 2 Model, spin-up, and experiments

### 2.1 Model description

5 The atmospheric submodel of [..<sup>29</sup>]MPI-ESM1.2 is ECHAM6.3 (Mauritsen et al., 2018)[..<sup>30</sup>], which includes the land-surface scheme JSBACH (Stevens et al., 2013; Reick et al., 2013). The ocean and sea ice submodels are combined in MPIOM (Jungclaus et al., 2013; Notz et al., 2013). ECHAM6.3 and MPIOM are coupled via the Ocean-Atmosphere-Sea-Ice coupler version 3 (OASIS3-mct; Valcke, 2013) with a coupling frequency of 1 h. ECHAM6.3 was used with 95 vertical levels at two different spectral resolutions, truncated at T127 (~103 km) in HR and ER and T255 (~51 km) in XR. We did not change any parameter going from HR to XR, except for the horizontal diffusion damping term and a reduction of the time step from 200 s (HR) to 90 s (XR), and the horizontal diffusion damping term. Both use the same eddy-permitting ocean with a resolution of 0.4° (~44 km) [..<sup>31</sup>] on a tripolar grid (TP04, Jungclaus et al., 2013) with 40 unevenly spaced vertical levels. The first 20 levels are distributed in the top 750 m. A partial grid cell formulation (Adcroft et al., 1997; Wolff et al., 1997) is used for a more accurate representation of the bottom topography. River runoff is calculated by a horizontal discharge model (Hagemann and Gates, 2003).

In the ER configuration, the ocean component has a nominal resolution of 0.1° (~11 km) on a tripolar grid (TP6M) (e.g. von Storch et al., 2012), with higher resolution in the vicinity of the poles. We did not change any parameters compared to the TP04 grid as prescribed by the HighResMIP protocol (Haarsma et al., 2016), except that we reduced the time step from 3600 s (TP04) to [..<sup>32</sup>]240 s (TP6M). Table 1 provides an overview of the simulations that we compared in this study. The HR configuration of our reference simulation is exactly the same as in Müller et al. (2018). The XR configuration was used by Hertwig et al. (2015) (denoted as VHR in their study) for AMIP simulations with ECHAM6 and in Milinski et al. (2016) (denoted as HRatm in their study) for MPI-ESM runs. The [..<sup>33</sup>]TP6M configuration was already used in stand-alone ocean simulations with 80 vertical levels (von Storch et al., 2012; Stössel et al., 2018), and in fully coupled simulations (e.g. Stössel et al., 2015).

25 All simulations (except ER) use the thickness diffusivity  $\kappa_{GM}$  of the Gent et al. (1995) (GM) parameterization to account for the diffusion and tracer advection induced by unresolved mesoscale eddies in the ocean. For the TP04 grid,  $\kappa_{GM}$  is constant and chosen to be proportional to the grid spacing. A value of  $\kappa_{GM} = 250 \text{ m}^2 \text{ s}^{-1}$  is chosen for a 400 km wide grid cell and it reduces linearly with increasing resolution. That is, for the eddy-permitting TP04 grid  $\kappa_{GM}$  is only about 10% of this value. The lateral eddy diffusivity is parameterized by an isopycnal formulation (Redi, 1982) and is set to  $\kappa_{Redi} = 1000 \text{ m}^2 \text{ s}^{-1}$  for

---

<sup>29</sup>removed: MPI-ESM version 1.2

<sup>30</sup>removed: and it

<sup>31</sup>removed: and

<sup>32</sup>removed: 300

<sup>33</sup>removed: ER



a 400 km wide grid cell, again reducing linearly with increasing resolution. In ER,  $\kappa_{GM}$  is set to zero, <sup>[.34]</sup>but  $\kappa_{Redi}$  is unchanged (von Storch et al., 2016).

An innovation over previous versions of HR and XR is that we used two different diapycnal mixing schemes (see section 2.2<sup>[.35]</sup>): the PP scheme as default, and the KPP scheme. The <sup>[.36]</sup>diapycnal mixing scheme used in a simulation is indicated by subscripts: HR<sub>pp</sub>, HR<sub>kpp</sub>, XR<sub>pp</sub>, XR<sub>kpp</sub>, and ER<sub>pp</sub>. Note that the model was not retuned when the KPP scheme was used, to account for the pure effect of a changed ocean mixed layer scheme. For all our comparisons, HR<sub>pp</sub> is our reference simulation.

We follow the HighResMIP protocol (Haarsma et al., 2016) for initialising and forcing our coupled control simulations. The coupled runs used fixed 1950 forcing that consists of greenhouse gases, including ozone and aerosol loadings of the 1950s climatology (~ 10 year mean). The HR simulations were initialised from an HR control simulation that was nudged to the averaged state of 1950 to 1954 of the UK MetOffice Hadley Centre EN4 observational data set (version 4.2.0; Good et al. (2013)). The XR runs were initialised from the same ocean state, but from an atmospheric state that has been spun up for 10 years from a dry state. ER was initialised from the HR atmospheric state and directly from EN4 (averaged state from 1950-54) for the ocean. We integrated the HR and XR control simulations for 150 years and the ER simulation for 80 years (see Tab 1). We cut off the first 30 years as spin-up and used the following 50 years from the control runs for the analysis.

## 2.2 Diapycnal mixing

Previous MPI-ESM versions used a modified version of the Richardson-number dependent formulation of Pacanowski and Philander (1981) (PP scheme). The modification of the original PP formulation consists of a parameterization for <sup>[.37]</sup>wind-induced mixing that decays exponentially with depth (Marsland et al., 2003). Convection is parameterized by enhanced eddy diffusivity ( $k_v = 0.1 \text{ m}^2 \text{ s}^{-1}$ ). For our simulations here, we corrected a bug associated with the vertical viscosities, which were only about 50 % of the correct solution from the PP scheme. This error was then also corrected in the HR version described by Müller et al. (2018). The background value for the vertical diffusivity is constant and was set to  $1.05 \cdot 10^{-5} \text{ m}^2 \text{ s}^{-1}$  and to  $5 \cdot 10^{-5} \text{ m}^2 \text{ s}^{-1}$  for the viscosity. The background values represent the breaking of internal waves, which provide the mechanical energy for diapycnal mixing in the interior of the ocean. The PP scheme is the default option in MPI-ESM1.2 and is thus used in our reference simulation (HR<sub>pp</sub>).

To improve the diapycnal mixing in MPIOM, we implemented the non-local <sup>[.38]</sup>'K-Profile parameterization' (KPP, Large et al., 1994). The KPP scheme was implemented by adding the Community Vertical Mixing (CVMix) project library (Griffies et al., 2013) to MPIOM. In the KPP scheme, the turbulent transport do not only depend on local gradients of the properties, but also on the overall state of the boundary layer, that is the surface fluxes and the boundary layer depth (Large et al., 1994).

---

<sup>34</sup>removed: while

<sup>35</sup>removed: for details

<sup>36</sup>removed: used

<sup>37</sup>removed: wind induced

<sup>38</sup>removed: K profile

The non-local turbulent transport represents how surface properties are redistributed from the surface layer into the boundary layer, for example by buoyant plumes, Langmuir cells, or mesoscale cellular convective elements.

The non-local fluxes are non-zero only for tracers in unstable forcing conditions, i.e. for negative surface buoyancy fluxes. They then directly depend on the net heat and freshwater fluxes crossing the ocean surface multiplied by the local vertical diffusivities, a vertical shape function, and some constants (Griffies et al., 2013). For this non-local fluxes, the same vertical diffusivities are assumed as for the local tracer diffusion. In contrast to the PP scheme, these diffusivities are not limited to a user specified value, but depend on a depth-dependent turbulent vertical velocity scale, on a vertical shape function, and on the mixed layer depth (Griffies et al., 2013).

Below the mixed layer, we use the PP scheme with the same constant background diffusivity and viscosity. The diffusivities are not matched at the base of the mixed layer to avoid potential overshooting of the non-local transport terms, which might produce extrema in the tracer field (Griffies et al., 2013). Under sea ice, we reduce the [..<sup>39</sup>] wind-induced mixing in the PP and in the KPP scheme, so that the surface friction velocity  $u_*$  decreases quadratically with increasing sea ice concentration. For simplicity, we neglect that the momentum flux from the atmosphere into the ocean could be even stronger when sea ice is present, because of additional momentum flux at the interface of sea ice and the underlying sea water.

### 15 3 Evaluation of the atmospheric mean state

For the evaluation, the MPI-ESM1.2 simulations were averaged over the first 50 model years after the spin-up. We used the ERA-Interim reanalysis data (Dee et al., 2011) averaged from 1979–2005 as reference for the atmospheric mean state, as HR was tuned to this period (Mauritsen et al., 2012).

#### 3.1 Surface quantities

##### 20 3.1.1 10 m wind speed

The time-mean of the simulated 10 m scalar wind speed agrees well with ERA-Interim for large parts of the world’s oceans and over the continents (Fig. 1). Consistently too low wind speeds, however, evolve over the northern parts of America and Europe, over South America, and over Greenland and Antarctica. Too strong winds are simulated by all models over the subtropical oceans north and south of the equator. Models with the T127 atmosphere further simulate too strong winds speeds over the Weddell Sea (Fig. 1b,c,f).

[..<sup>40</sup>] Overall, the KPP scheme has only a minor effect on the 10 m wind speed [..<sup>41</sup>]. At the equatorial Pacific, KPP reverses the negative bias to a positive wind speed bias. Further, the negative bias in the Denmark and Fram Strait is reduced because of lower sea ice concentration in this area (see section 4.4).

---

<sup>39</sup>removed: wind induced

<sup>40</sup>removed: Although

<sup>41</sup>removed: , in some areas KPP reduces the biases. For example, HR<sub>kpp</sub> (Fig. 1c) reduces the positive bias in the subtropical Atlantic and North Pacific

Increasing the horizontal resolution from T127 to T255 in XR<sub>pp</sub> (Fig. 1d) introduces a negative wind speed bias over the Antarctic Circumpolar Current (ACC) because of a reduced meridional pressure gradient. **The near-surface wind speeds are further too low** over the subpolar gyre in the North Atlantic, and over the Nordic Seas. This reduced wind [<sup>42</sup>] **stress** over the subpolar gyre causes a slowdown of the AMOC in XR<sub>pp</sub>, as described in detail by Putrasahan et al. (2018)[<sup>43</sup>].

5 By using the KPP scheme in the XR model (XR<sub>kpp</sub>; Fig. 1e), the wind speed reduces in the same areas as mentioned above, but not as strong as in XR<sub>pp</sub>. [<sup>44</sup>] However, the wind speed is still lower over the Nordic Seas and in the Pacific sector of the ACC. [<sup>45</sup>]

Increasing the horizontal resolution of MPIOM from 0.4° to 0.1° (ER<sub>pp</sub>; Fig. 1f) reduces the positive bias over the Indian Ocean, over the Greenland Sea, and over the subtropical Atlantic. Despite these improvements, an eddy-resolving ocean does  
10 have only a minor effect on the near-surface wind speed, when coupled to a rather coarse T127 atmospheric resolution.

### 3.1.2 2 m temperature

In contrast to the near-surface wind speed, the 2 m temperature distribution (Fig. 2) is [<sup>46</sup>] **strongly** affected by changing the horizontal resolution of the submodels or by replacing the vertical ocean mixing parameterization. [<sup>47</sup>] **Over the ocean, it** closely resembles the bias of the sea surface temperature (section 4.1.1). Again, all models (except XR<sub>pp</sub>) agree well with  
15 ERA-Interim over the continents and over large parts of the world's oceans, in particular over the tropical and subtropical oceans and in the Arctic Ocean.

An area with larger discrepancies across all models is the North Atlantic. Here, all simulations show a cold bias, which is a common error in state-of-the-art ESMs [<sup>48</sup>] (Randall et al., 2007) **that is mostly** caused by a too zonal North Atlantic Current (NAC) [<sup>49</sup>] (Dengg et al., 1996), or by **insufficient northward heat transport by the AMOC** (Wang et al., 2014a). **Drews et al. (2015) could demonstrate that correcting the flow field for biases they were able to remove the cold bias in the North Atlantic.** Another area of cold near-surface air temperature biases is [<sup>50</sup>] **the region around Antarctic peninsula. In contrast, all** models (except XR<sub>pp</sub>) simulate a consistent warm bias over the Canadian Archipelago, central Africa and central Asia. Although [<sup>51</sup>] **reduced in their** magnitudes, all these biases remain in the higher resolution models or when KPP is used.

Our models with the T127 atmosphere (Fig. 2b,c,f) simulate [<sup>52</sup>] a warm bias over the Weddell Sea, which is caused by  
25 too frequent open polynyas (see section 4.5). This warm bias vanishes [<sup>53</sup>] **or** partly changing its sign in the western Weddell

---

<sup>42</sup>removed: forcing

<sup>43</sup>removed: and briefly outlined in section 4

<sup>44</sup>removed: This indicates that KPP can sustain a sufficient mixing to prevent a decline of the AMOC albeit a weaker wind forcing (as discussed later).

<sup>45</sup>removed: This reduced wind forcing of the ACC decreases the transport through the Drake passage as discussed later. Other regions are much less unaffected.

<sup>46</sup>removed: stronger

<sup>47</sup>removed: It

<sup>48</sup>removed: (Dengg et al., 1996), which is

<sup>49</sup>removed: (see section 4.1.1)

<sup>50</sup>removed: Antarctica and its peninsula. All

<sup>51</sup>removed: reducing in its

<sup>52</sup>removed: further

<sup>53</sup>removed: ,

Sea, when increasing the atmospheric resolution to T255 in the XR models (Fig. 2d,e). This is because the frequency of open-ocean polynyas reduces (see section 4.5), so that the Weddell Sea is more often covered with thicker ice (not shown), causing colder near-surface temperatures. However, a severe cold bias develops over the North Atlantic and the Nordic Seas in XR<sub>pp</sub>, as mentioned before. As a consequence, the temperatures over Europe decrease as well.

- 5 Using the KPP scheme in HR (Fig. 2c) results in warmer 2 m temperatures in the northern hemisphere, so that cold biases reduce, but warm biases become stronger. The reason is a stronger northward heat transport into the North Atlantic (see section 4) and thus a stronger heat release to the atmosphere. In XR<sub>kpp</sub> (Fig. 2e), the warming caused by the KPP scheme and the cooling caused by the T255 atmosphere compensate, so that the bias pattern in the northern hemisphere is comparable to that of HR<sub>pp</sub>. The cold bias along the ACC, however, is not affected by KPP and is similar to XR<sub>pp</sub>.
- 10 <sup>[..<sup>54</sup>]</sup> Compared to HR<sub>[..<sup>55</sup>]<sub>pp</sub></sub>, <sup>[..<sup>56</sup>]</sup> most of the cold biases vanish in ER<sub>pp</sub>; in the region of the ACC, this is partly due to resolved eddies. The warm bias in the Weddell Sea, however, is <sup>[..<sup>57</sup>]</sup> considerably enhanced in the Atlantic sector of the Southern Ocean, because of less frequent open-ocean polynyas in ER<sub>pp</sub>.

## 3.2 Vertical structure of zonal wind speed and temperature

### 3.2.1 Zonal wind speed

- 15 Fig. 3 shows the ERA-Interim climatology of the <sup>[..<sup>58</sup>]</sup> time-averaged zonal-mean wind speed (u-velocity) and the model biases. Overall, the vertical structure of the zonal wind speed is well represented in MPI-ESM1.2. A consistent bias <sup>[..<sup>59</sup>]</sup> in all simulations are too strong subtropical jets (centred at ~ 200 hPa). These <sup>[..<sup>60</sup>]</sup> too strong jets contribute further to higher zonal wind speeds extending into the upper troposphere at 40 to 45°S and 40 to 45°N, as also found by Müller et al. (2018). <sup>[..<sup>61</sup>]</sup> Furthermore too strong zonal wind speeds are simulated in troposphere in the tropics at roughly 400 hPa.
- 20 All models simulate <sup>[..<sup>62</sup>]</sup> consistently too low zonal wind speeds over the Southern Ocean at ~ 60°S <sup>[..<sup>63</sup>]</sup> throughout the whole troposphere. <sup>[..<sup>64</sup>]</sup> The overall bias pattern in HR<sub>kpp</sub> (Fig. 3c) <sup>[..<sup>65</sup>]</sup> is very similar to to HR<sub>pp</sub> (Fig. 3b), although the bias in the over the Southern Ocean reduces and increases in the upper troposphere. The T255 atmosphere in the XR models amplifies all biases (Fig. 3d-e). That is, the subtropical jets become stronger and shift equatorwards and the zonal wind speed over the Southern Ocean reduces further.

---

<sup>54</sup>removed: Although ER<sub>pp</sub> (Fig. 2f) produces a similar bias pattern as HR

<sup>56</sup>removed: because of the same T127 atmosphere, it clearly reduces the cold bias over the ACC in the Southern Ocean due to partly

<sup>57</sup>removed: slightly

<sup>58</sup>removed: time-mean

<sup>59</sup>removed: of

<sup>60</sup>removed: enhanced

<sup>61</sup>removed: Another positive bias is simulated in the middle of the tropical troposphere (at ~ 400 hPa)

<sup>62</sup>removed: a consistent negative bias

<sup>63</sup>removed: that extends through

<sup>64</sup>removed: Although KPP reduces the bias over the Southern Ocean

<sup>65</sup>removed: and increases slightly the biases in the upper troposphere, the overall pattern

Important for the ocean is the extension of the negative bias over the Southern Ocean down to the surface [..<sup>66</sup>] in both XR simulations (stronger in XR<sub>pp</sub> than in XR<sub>kpp</sub>), which [..<sup>67</sup>] reduces the zonal wind stress driving the ACC and the upwelling of Circumpolar Deep Water (CDW). However, this wind bias in XR was found not to be the cause of the AMOC collapse (Putrasahan et al., 2018). Note that the near-surface negative bias for the North Atlantic cannot be seen here, as  
5 discussed above, because it cancels in the zonal mean. [..<sup>68</sup>]

The bias pattern in ER<sub>pp</sub> (Fig. 3f) is similar to HR<sub>pp</sub> and HR<sub>kpp</sub>, which indicates that the ocean resolution does not have a large impact on the mean zonal wind speed [..<sup>69</sup>]. However, both the positive bias in the subtropical jet in the northern hemisphere and the negative bias north of 60° N are slightly amplified.

### 3.2.2 Zonal temperature

10 The [..<sup>70</sup>] cross-sections of the global time-mean zonal-mean temperature (Fig. 4) show cold biases in the upper troposphere (at ~ 250 hPa) in both hemispheres. In the HR/XR simulations with PP (Fig. 4b,d), the cold bias extends to the surface in both hemispheres (Fig. 4b,d) [..<sup>71</sup>]. In HR<sub>kpp</sub>, however, this bias disappeared (Fig. 4c [..<sup>72</sup>]), and emerges only weakly in XR<sub>kpp</sub> (Fig. 4e).

In XR<sub>pp</sub> the surface-extending cold bias becomes larger in the lower troposphere compared to HR<sub>pp</sub>, because of the [..<sup>73</sup>] weaker AMOC and the freezing of the Labrador and Nordic Seas (see section 4 below). In contrast, the AMOC remains stable in XR<sub>kpp</sub> (Fig. 4e), so that no severe cold bias evolves in the lower troposphere of the northern hemisphere. However, the KPP scheme does not affect the cold bias in the southern hemisphere, as already found for the 2 m temperature. A clear improvement can be seen in ER<sub>pp</sub> (Fig. 4f), which removes both biases in the lower and middle troposphere in both hemispheres. We conclude that [..<sup>74</sup>] an eddy-resolving ocean resolution plays a major role for the mean-states of the large-scale temperature  
20 distribution in the atmosphere. Although the large cold bias above the Antarctic continent is present in all simulations, the bias is reduced in ER<sub>pp</sub> by about 2°C. The developing warm bias over the Weddell Sea in ER<sub>pp</sub> can also be seen in the cross-section at roughly 60°S.

---

<sup>66</sup>removed: (except in ER<sub>pp</sub>)

<sup>67</sup>removed: directly reduces the wind forcing of the ocean.

<sup>68</sup>removed: On the other hand, the eddy-resolving ocean does not modify

<sup>69</sup>removed: (Fig. 3f)

<sup>70</sup>removed: cross sections of the

<sup>71</sup>removed: , whereas with KPP only in the southern hemisphere

<sup>72</sup>removed: ,

<sup>73</sup>removed: slowing down of the

<sup>74</sup>removed: eddies play

## 4 Evaluation of the ocean mean state

### 4.1 Ocean surface temperature and salinity

#### 4.1.1 Sea surface temperature

The sea surface temperature bias of MPI-ESM1.2 to the UK MetOffice EN4 data (version 4.2.0; Good et al. (2013), averaged from 1945–1955) is shown in Fig. 5. We used this period for EN4 since our HR simulations were initialised from a simulation that was nudged to the averaged EN4 state of 1950–54, and we further allow for some variance. The results differ only marginally if another period is chosen (not shown). In general, biases occur in prominent areas and are affected by both changing the model resolution and the <sup>[..75]</sup>vertical ocean mixing scheme.

All simulations (except XR<sub>pp</sub>) simulate realistic sea surface temperatures in comparison to EN4 (Fig. 5). <sup>[..76]</sup>About 1 to 2°C colder sea surface temperatures than in EN4 are simulated in the northern hemisphere <sup>[..77]</sup>by HR<sub>pp</sub> (Fig. 5b). The strongest cold bias of up to −7°C occurs in the North Atlantic between 40°N to 50°N, centred at about 30°W. A similar magnitude was described by Müller et al. (2018) for MPI-ESM1.2-HR. The main explanation for this cold bias, as given in section 3.1.2, is a too zonal NAC (Dengg et al., 1996), causing a too far southward intrusion of fresh and cold Labrador Sea water (Müller et al., 2018) <sup>[..78]</sup>and insufficient northward heat transport by the AMOC (Wang et al., 2014a). Another reason could be too much export of Mediterranean water at about 1000 m depth (Fig. 8), thus leading to a too strong halocline that inhibits vertical mixing.

Too cold sea surface temperatures are further simulated along the ACC (bias of ~ 2°C). Coastal upwelling areas west of Africa and South America are about 1 to 2°C too warm in all simulations with the T127 atmosphere (Fig. 5b,c,f), as found by Milinski et al. (2016)

Increasing the atmospheric resolution from T127 to T255, while using the PP scheme (XR<sub>pp</sub>), causes a severe cold bias in the whole northern hemisphere (Fig. 5d), strongest in the North Atlantic (−9°C). This cooling was already described by Putrasahan et al. (2018) and is caused by a slowed AMOC due to <sup>[..79]</sup>weak wind stress over the subpolar gyre and <sup>[..80]</sup>weak northward heat and salt transports (<sup>[..81]</sup>Tab. 4, Fig. A1, and section 4.6). Although the reduced wind <sup>[..82]</sup>stress over the Southern Ocean (Fig. 1) might also contribute to a weakening of the AMOC (Toggweiler and Samuels, 1995) in XR<sub>pp</sub>, Putrasahan et al. (2018) found no effect of this negative wind bias on the AMOC slow down, and argue that the timescale of the slowing AMOC is much faster than any feedback from the Southern Ocean to the North Atlantic.

---

<sup>75</sup>removed: diapycnal

<sup>76</sup>removed: Colder sea surface temperatures of about

<sup>77</sup>removed: in

<sup>78</sup>removed: .

<sup>79</sup>removed: too

<sup>80</sup>removed: too

<sup>81</sup>removed: see also

<sup>82</sup>removed: forcing

On the other hand, the biases in the coastal upwelling areas diminished to some extent, because of the better resolved coastal wind systems. This warm bias reduction in the upwelling areas is consistent with other studies (Putrasahan et al., 2013; Small et al., 2015; Milinski et al., 2016). Furthermore, the Pacific cold-tongue almost disappears, but now the tropical Pacific becomes too warm south of the equator.

- 5 The <sup>[..<sup>83</sup>]</sup> cold bias in the North Atlantic **diminishes drastically with the KPP scheme** in HR<sub>kpp</sub> (Fig. 5c), but <sup>[..<sup>84</sup>]</sup> **the** warm bias in the Labrador Sea and in the Nordic Seas **is enhanced** because of an increased heat transport into the North Atlantic and its ambient seas (Fig. A1c). Moreover, a warm bias evolves in the tropical Pacific north and south of the equator. However, the KPP scheme simulates a stable AMOC in XR<sub>kpp</sub> (Fig. 5e), because of a stronger subpolar gyre (see Tab. 2). The enhanced deep convection and North Atlantic Deep Water (NADW) formation in the Labrador Sea (section 4.5) sustains a strong enough upper cell of the AMOC (section 4.6) and thus a sufficient northward transport of heat and salt (see <sup>[..<sup>85</sup>]</sup> Tab. 4 and Fig. A1c-d). This surplus in heat and salt transports, compared to XR<sub>pp</sub>, prevents the Labrador Sea from freezing over. This finding is an important result and provides a solution to the declining AMOC strength for MPI-ESM1.2-XR. In addition, enhanced upwelling in the Southern Ocean further strengthens the northern cell of the AMOC (Marshall et al., 2017), although it is not the main reason in our model.
- 15 <sup>[..<sup>86</sup>]</sup> **The** cold bias along the ACC **is clearly reduced in ER<sub>pp</sub>** (Fig. 5f), because of resolving eddies that flatten and shift the outcropping isopycnals southwards. <sup>[..<sup>87</sup>]</sup> **Furthermore, the cold biases** in the North Atlantic, in the North Pacific, and in the Mediterranean Sea <sup>[..<sup>88</sup>]</sup> **are reduced. The warm** biases in the upwelling regions, however, remain because of the coarse T127 atmosphere.

#### 4.1.2 Sea surface salinity

- 20 As with sea surface temperature, the sea surface salinity is well simulated <sup>[..<sup>89</sup>]</sup> **by** MPI-ESM1.2 for most parts of the ocean with respect to EN4 (Fig. 6). However, in some areas we find larger discrepancies. In the North Atlantic, the surface waters are too fresh where we already found a cold bias. This freshwater bias is again caused by the too zonal NAC and the entrainment of fresher water masses from the Labrador Current. Although all models produce this bias, its magnitude differs with respect to HR<sub>pp</sub> (Fig. 6a) <sup>[..<sup>90</sup>]</sup> **depending on model resolution and the chosen** vertical mixing scheme in the ocean.

---

<sup>83</sup>removed: KPP scheme reduces the

<sup>84</sup>removed: enhances a

<sup>85</sup>removed: also

<sup>86</sup>removed: ER<sub>pp</sub> clearly reduces the

<sup>87</sup>removed: It further reduces the cold bias

<sup>88</sup>removed: . The

<sup>89</sup>removed: with

<sup>90</sup>removed: by either increasing the model resolution or by replacing the



[..<sup>91</sup>] The freshwater bias in the North Atlantic (Fig. 6c) is reduced by both using the KPP scheme and the eddy-resolving ocean[..<sup>92</sup>]. In both cases a stronger northward salt transport[..<sup>93</sup>] is simulated in the Atlantic (Fig. A1d), so that probably more saline waters are exported from the Labrador Sea along the Deep Western Boundary Current.

In case of ER<sub>pp</sub>, the Gulf Stream separation is better represented, which further reduces the bias in the North Atlantic (Fig. 6f). The resolved eddies further remove the freshwater bias along the ACC. The water masses in the Mediterranean Sea become more saline, which removes the freshwater bias that the HR and XR models produce.

Increasing the atmospheric resolution from T127 to T255 enhances the freshwater bias in XR<sub>pp</sub> (Fig. 6d) because of the above described AMOC slow down, with the consequence that less salt is transported by the Gulf Stream and the NAC into the North Atlantic (Fig. A1c-d). In XR<sub>kpp</sub> (Fig. 6e), both effects work in opposite directions and almost balance each other, so that the bias is similar to that in HR<sub>pp</sub>.

Another bias present in all simulations is a too saline near-surface Arctic Ocean, originating from the Siberian coast that extends across the Transpolar Drift, but also into the Canadian basin. These too saline waters indicate too little freshwater input from the Siberian rivers, in particular from the Lena river (Laptev Sea). Another effect that enhances this error could be too little barotropic tidal mixing along the Arctic shelves and thus too little horizontal spreading of the river waters (Wang et al., 2014b).

Finally, a strong freshwater bias is simulated in the western Pacific. The KPP scheme seems not to modify this bias, but the surface waters become severely fresher in both XR simulations[..<sup>95</sup>] (Fig. 6d-e). In general, all models simulate too little precipitation and too much evaporation for most parts of the globe (Fig. A2). In the western Pacific, the XR models even simulate slightly less precipitation (Fig. A2d-e), so that we suspect that the supply of salty waters from the east reduces in XR enhancing the freshwater bias. Although still too fresh, ER<sub>pp</sub> reduces this bias.

## 4.2 Ocean interior

Figure 7 shows the time-mean zonal-mean temperature bias of the MPI-ESM1.2 simulations to EN4 for the Atlantic and the Arctic Ocean. The bias of the HR and XR simulations are very similar and show a maximum warm bias at roughly 40° S, continuing to 30° N at depths of the AAIW (about 800 to 1000 m). These biases are thought to be caused by erroneous interior circulation, tracer advection and mixing due to unrepresented eddy-induced tracer transports (Griffies et al., 2009; Jungclaus et al., 2013).

The warm bias at 40° S is related to[..<sup>96</sup>] enhanced advection of warm and salty waters from the Indian Ocean[..<sup>97</sup>] (Fig. A5 and Fig. A6), because the resolution is still too low to represent the Agulhas Current system (Jungclaus et al., 2013), with

---

<sup>91</sup> removed: Both the KPP scheme

<sup>92</sup> removed: reduce the freshwater bias in the North Atlantic, because of

<sup>93</sup> removed: by the NAC and because

<sup>94</sup> removed: less

<sup>95</sup> removed: . Since there is no obvious difference in precipitation or evaporation (not shown),

<sup>96</sup> removed: too much

<sup>97</sup> removed: (Jungclaus et al., 2013)

its retroflection and intermittent eddy shedding that transfers heat and salt into the Atlantic. <sup>[..<sup>98</sup>]</sup> The retroflection is not well present in HR/XR <sup>[..<sup>99</sup>]</sup> with the TP04 grid, so that a constant Agulhas leakage transports <sup>[..<sup>100</sup>]</sup> too warm and too salty water into the South Atlantic (Fig. A7). Neither the KPP scheme (Fig. 7c) nor the T255 atmosphere (Fig. 7d,e) reduces this warm bias. <sup>[..<sup>101</sup>]</sup> On the contrary, with the KPP scheme, the inflow becomes stronger so that more heat and salt is exchanged (Fig. A1a-b and Fig. A7b,d). The warm bias and the salinity bias only reduce with the eddy-resolving ocean grid (TP6M) in ER<sub>pp</sub> (Fig. 7f), <sup>[..<sup>102</sup>]</sup> which is also clearly visible at 740 m depth (Fig.A5 and Fig.A6), because less warm and salty water from the Agulhas Current flow into the South Atlantic (Fig. A7e). This improvement was also reported by von Storch et al. (2016) for ocean-only simulations. There are two reasons for this warm bias reduction in ER<sub>pp</sub>: (1) the Agulhas Return Current, Agulhas Retroflection and the Agulhas leakage are now better resolved, producing a more realistic circulation and water mass transfer from the Indian Ocean into the South Atlantic, as seen in other similar studies (McClellan et al., 2011; Putrasahan et al., 2016; Cheng et al., 2018); and (2) the eddy-induced cooling and freshening of the intermediate ocean (von Storch et al., 2016) further reduces the warm bias.

The warm bias in Fig. 7a-e stretches northward at the depth of the Antarctic Intermediate Water (AAIW) and shows another maximum at 30° N that is related to the spreading of Mediterranean waters. The HR and XR models use the same TP04 ocean grid and simulate both the observed net volume transport through the Strait of Gibraltar (net inflow of about 0.04 Sv; see Tab. 3). In the TP04 grid, the strait is about 54 km wide with a sill depth of about 230 m. The outflowing Mediterranean water is too warm and too saline in all HR and XR simulations compared to EN4 (see Fig.A4 and Fig.A6), which explains the warm and saline bias (Fig. 8a-e). <sup>[..<sup>103</sup>]</sup> The Mediterranean water is slightly more saline in HR<sub>kpp</sub> than in HR<sub>pp</sub>, so that the water spreading northward along the European continental shelf becomes also more saline and contributes to saltier Northeastern Atlantic Deep Water. This enhanced flow of saline water into the subpolar gyre explains the reduced salinity bias at 40 to 50° N at a depth of 1000-1500 m (Fig. 8c). The main spreading pathway in all HR and XR models, however, is to the southwest into the open Atlantic.

As with the warm biases, the salinity biases reduce in ER<sub>pp</sub>. A fresher water mass at intermediate depth reflects a much more realistic representation of the AAIW (Fig. <sup>[..<sup>104</sup>]</sup> 8 and in detail in Fig. A8) and of the outflow of Mediterranean water. The latter is less saline and about 2 to 3° C colder (<sup>[..<sup>105</sup>]</sup> similar at a depth of 740 m; Fig. A4 and Fig. A6), reducing the warm and saline bias at 30° N (Fig. 7f and Fig. 8f). The reason for this major improvement is the better resolved bathymetry of the Strait of Gibraltar, which is about 24 km wide in the TP6M grid. Although the salinity maximum of the overflow water is about 100 m shallower than in EN4 (not shown), ER<sub>pp</sub> produces more realistic properties of upper and intermediate depth water masses.

---

<sup>98</sup>removed: In the

<sup>99</sup>removed: configurations

<sup>100</sup>removed: warm and salty water, instead

<sup>101</sup>removed: It reduces only

<sup>102</sup>removed: as

<sup>103</sup>removed: In HR<sub>kpp</sub>, the

<sup>104</sup>removed: A3

<sup>105</sup>removed: not shown

The too zonal NAC causes a cold and fresh bias between 40 to 50°N in the upper ocean (above 1000 m depth) in all simulations (Fig. 7 and Fig. 8). Although the Gulf Stream separates earlier from the American coast in ER<sub>pp</sub> (not shown), its flow path is still too zonal, such that the cold bias in the North Atlantic [..<sup>106</sup>] is not removed. This indicates that an eddy-resolving ocean alone does not solve the cold-bias issue in the North Atlantic.

5 The too warm and saline subpolar gyre causes a warm and saline bias in the deep convection areas, centred around 60°N (Fig. 7 and Fig. 8). The bias [..<sup>107</sup>] is larger in HR<sub>kpp</sub> because of the increased transport of heat and salt from the [..<sup>108</sup>] subtropical gyre into the subpolar gyre. The bias [..<sup>109</sup>] is reduced in the XR models because of the weaker subpolar gyre and the reduced salt transport by the gyre. However, from Fig. 8d, we see that the reduced salinity is the main factor causing the reduced convection in XR<sub>pp</sub> (also supported by Fig. A1d), as described by Putrasahan et al. (2018). Another contribution  
10 is too warm and saline overflow waters from the Nordic Seas, an issue that was also present in coarser MPI-ESM versions (Jungclauss et al., 2013). The bias is mostly unaffected in ER<sub>pp</sub>.

The Atlantic water entering the Arctic Ocean (0°C potential temperature bounds in Fig. 7a) is too warm and its layer is too thick in all HR and XR simulations (Fig. 7b-e), causing a warm bias within the Atlantic layer between 200 m to 1000 m. This is a common error in ocean general circulation models (Ilıcak et al., 2016), which is thought to be caused by spurious numerical  
15 mixing of the advection operator (Holloway et al., 2007). Zhang and Steele (2007) further found a direct impact of the vertical mixing strength onto the circulation of the Atlantic Water into the Arctic Ocean. Reducing the vertical mixing in the European Basin reduces the diffusion of the Atlantic Water and results in a thinner layer. By comparing the vertical mixing across all our simulations (Fig. [..<sup>110</sup>] A3) we see that ER<sub>pp</sub> simulates less vertical mixing in the Arctic Ocean at the depth of the Atlantic Water layer (as well as in the deeper layers of the Arctic Ocean and Atlantic). At 740 m depth, XR<sub>pp</sub> shows an even fresher  
20 Atlantic water layer (Fig. A6), which is probably a consequence of a too fresh North Atlantic.

Further, less vertical mixing in the Fram Strait can reduce the inflow of Atlantic Water into the Arctic Ocean (Zhang and Steele, 2007) and thus reduce the warm bias as ER<sub>pp</sub> does. In fact, Zhang and Steele (2007) recommend to reduce the background diffusivity to  $1 \cdot 10^{-6} \text{ m}^2 \text{ s}^{-1}$  and viscosity to  $1 \cdot 10^{-5} \text{ m}^2 \text{ s}^{-1}$ . The background value for diffusivity is thus an order of magnitude lower than in our configuration. However, our results show that an eddy-resolving resolution in the Arctic Ocean  
25 removes the warm and saline bias in the Atlantic Water layer, without changing any background values for vertical mixing. That a very high-resolution is necessary for the Arctic Ocean was recently shown by Wang et al. (2018) as well, who used a background diffusivity of  $1 \cdot 10^{-5} \text{ m}^2 \text{ s}^{-1}$ , which is close to what we chose. In contrast, for example Sein et al. (2018) chose to reduce the background value by one order of magnitude.

---

<sup>106</sup>removed: improves only marginally.

<sup>107</sup>removed: increases

<sup>108</sup>removed: Subtropical Gyre

<sup>109</sup>removed: reduces

<sup>110</sup>removed: A1

### 4.3 Ocean circulation

To evaluate the large-scale ocean circulation, we compared barotropic stream functions of selected regions, transports through straits, and the AMOC. Overall we find three effects: (1) increasing the atmospheric resolution to T255 reduces the gyre strengths, (2) the KPP scheme enhances the strength of all gyres, and (3) the effect of an eddy-resolving ocean is bi-directional.

5 The simulated subpolar gyre strengths range from 31.0 to 40.6 Sv and are all within the observational range of 26.0 to 40.0 Sv (Tab. 2).  $HR_{kpp}$  simulates a [\[.111\]](#) stronger subpolar gyre (+6 Sv) than the reference simulation  $HR_{pp}$ . Both  $XR_{pp}$  and  $XR_{kpp}$  show a clear drop of the gyre strength with a T255 atmosphere, as described by Putrasahan et al. (2018). In contrast, increasing the ocean resolution to eddy-resolving ( $ER_{pp}$ ) does not affect the subpolar gyre strength noticeably [compared to  \$HR\_{pp}\$](#) .

10 The volume transport of the [\[.112\]](#) subtropical gyre in the North Atlantic, however, reacts more sensitive to the chosen vertical ocean mixing scheme and the eddy-resolving resolution. Compared to the reference of 48.2 Sv ( $HR_{pp}$ ), the gyre strength [\[.113\]](#) slightly reduces to 44.0 Sv with a higher atmospheric resolution ( $XR_{pp}$ ). By using the KPP scheme, however, the gyre strength increases to 64.9 Sv ( $HR_{kpp}$ ) and remains similarly high with a T255 atmosphere ( $XR_{kpp}$ ).  $ER_{pp}$  produces a gyre strength as strong as with the KPP scheme. However, compared to observations (46.0 to 61.0 Sv),  $ER_{pp}$  and the simulations  
15 with KPP simulate slightly [\[.114\]](#) too strong transports. In the case of  $HR_{kpp}$  and  $XR_{kpp}$  [\[.115\]](#) the too strong volume transport of the subtropical gyre might further contribute to the positive salinity bias in the [\[.116\]](#) subpolar gyre at a depth of 500 to 1000 m (Fig. 8 and Fig. A6). Similarly too strong volume transports result for the subtropical gyre in the Pacific, except that  $ER_{pp}$  reduces the gyre strength.

Tab. 3 summarizes the transports through important passages. The net volume transport through the Bering Strait is of the  
20 same magnitude (0.6 to 0.7 Sv) for  $HR_{pp}$ ,  $HR_{kpp}$  and  $XR_{kpp}$ , which is on the lower side of the observations (0.7 to 1.1 Sv). The transport is even lower (0.5 Sv) in  $XR_{pp}$ , which indicates a low exchange of the Arctic Ocean and the Pacific. Increasing the ocean resolution leads instead to a higher transport of 0.9 Sv in  $ER_{pp}$ .

The net transport through Fram Strait, however, is too low in all simulations and reduces further with either an eddy-resolving [\[.117\]](#) ocean or the KPP scheme. A possible explanation for this reduced transport with KPP is given by Zhang  
25 and Steele (2007). They found that strong vertical mixing, as with the KPP scheme in our HR and XR simulations, deepens the Atlantic Water layer, but simultaneously weakens the inflow strength of Atlantic Water and the outflow strength of Arctic Water. However, the transport by  $ER_{pp}$  is even lower. The reason for this has to be further investigated.

The overflows through Denmark Strait and across the Iceland-Scotland ridge are important deep water connections for the Arctic and the Atlantic. Although all simulations produce realistic overflow [\[.118\]](#) volumes with respect to observations, we

---

<sup>111</sup>removed: slightly

<sup>112</sup>removed: Subtropical Gyre

<sup>113</sup>removed: only

<sup>114</sup>removed: stronger transport

<sup>115</sup>removed: this might explain

<sup>116</sup>removed: North Atlantic. Similar findings results for the Subtropical Gyre

<sup>117</sup>removed: grid

<sup>118</sup>removed: values

found [..<sup>119</sup>] a systematic increase of the overflow volumes by either increasing the [..<sup>120</sup>] ocean resolution or using KPP. [..<sup>121</sup>] In particular the eddy-resolving ocean (ER<sub>pp</sub>) produces more overflow waters. In the case of HR<sub>kpp</sub>, this higher transport is caused by enhanced deep convection in the Nordic Seas, particularly in the Greenland Sea (Fig. 10).

In all HR and XR simulations, the volume transport of the Florida Current is only about half the observed value of roughly 32 Sv (Tab. 3). Although the transport increases with the KPP scheme, only ER<sub>pp</sub> strengthens the transport considerably to 25 Sv. This indicates that the eddy-resolving ocean has a clear impact on this current. We found similar results for the Indonesian throughflow, which is important for climate because it connects the Pacific with the Indian Ocean and closes the upper warm branch of the MOC. Again KPP enhances the transports slightly, but only ER<sub>pp</sub> simulates a transport strength that is similar to observed values.

The Mozambique channel is an example where both a T255 atmosphere and KPP show a reduction in the transports. In ER<sub>pp</sub>, however, the transport is about twice as high as in the other simulations and more realistic with respect to recent observations of  $16.7 \pm 8.9$  Sv (Ridderinkhof et al., 2010). The ability to resolve eddies, particularly the Mozambique eddies along with a better resolved southward advection throughout the Mozambique Channel [..<sup>122</sup>], likely contributes to the more realistic transport of about 14 Sv in ER<sub>pp</sub> (Putrasahan et al., 2016; Ridderinkhof et al., 2010).

The observed baroclinic transport through the Drake Passage was usually stated as roughly 140 Sv. However, recently a new estimate reveals a much higher transport volume of about  $173.3 \pm 10.7$  Sv, if the barotropic transport is [..<sup>123</sup>] considered additionally (Donohue et al., 2016). With regard to this estimation, the models are within or close to the observed estimation. However, compared to the reference simulation HR<sub>pp</sub> (161.1 Sv) the transport reduces to about 150.0 Sv in XR<sub>pp</sub>, and from 191.9 Sv in HR<sub>kpp</sub> to 170.3 Sv in XR<sub>kpp</sub>. In ER<sub>pp</sub> the transport is lower than in all other models with 140.9 Sv. These results confirm that a higher atmospheric or ocean resolution reduces the transport in the Drake Passage, as described by Stössel et al. (2015) [..<sup>124</sup>]. In contrast, the transport through Drake passage is enhanced when using the KPP scheme [..<sup>125</sup>], probably because of enhanced deep convection in the Weddell Sea that steepens the isopycnals across the ACC and thus increases the geostrophic flow (Stössel et al., 2015; Naughten et al., 2018) (see section 4.5.2). This might indicate that the eddy activity is too low in the KPP simulations with the chosen GM coefficient, so that the isopycnals are not flattened enough by the eddies.

---

<sup>119</sup> removed: systematic effects of

<sup>120</sup> removed: model

<sup>121</sup> removed: Both, increased model resolution and the KPP scheme increase the strength of overflows.

<sup>122</sup> removed: likely

<sup>123</sup> removed: added

<sup>124</sup> removed: , while

<sup>125</sup> removed: enhances the transport

## 4.4 Sea ice

### 4.4.1 Arctic Ocean

The spatial distribution of sea ice thickness [..<sup>126</sup> ](Fig. 9) agrees well with the PIOMAS reanalysis [..<sup>127</sup> ](averaged from 1979–2005) (Zhang and Rothrock, 2003; Schweiger et al., 2011) and is comparable to the MPI-ESM1.2-HR simulation  
5 described by Müller et al. (2018). The sea ice extent is in good agreement with the observations from the EUMETSAT OSI SAF (OSI-409-a; v1.2) product (averaged from 1979–2005) (EUMETSAT Ocean and Sea Ice Satellite Application, 2015), except for XR<sub>pp</sub> in which the Labrador Sea freezes over. In general, the maximum ice thickness (multi-year ice) in March is [..<sup>128</sup> ]found along the north coast of Greenland and of the Canadian Archipelago[..<sup>129</sup> ], and reaches about 5 m in PIOMAS but only 3 m in HR<sub>pp</sub>. [..<sup>130</sup> ]We note that the ice is slightly thicker in this area in the simulations with KPP. In the  
10 Iceland Sea, the HR<sub>kpp</sub> simulates less sea ice, which is in better agreement with the observations, so that the ice cover is not reaching as far south as Iceland as in [..<sup>131</sup> ]HR<sub>[..<sup>132</sup> ]pp</sub> (Fig. 9b). The enhanced northward heat transport into the Nordic Seas in HR<sub>kpp</sub> results in warmer sea surface temperatures in the GIN seas, leading to a northward shift of the winter ice edge. Further, a stronger recirculating branch of the West Spitsbergen Current in the Fram Strait (not shown) in HR<sub>kpp</sub> pushes the East Greenland Current westwards to the east coast of Greenland, which narrows and becomes faster, so that sea ice is constrained  
15 to a narrower band along the coast. However, in XR<sub>kpp</sub> the sea surface temperatures are colder again, so that the sea ice reaches Iceland as in the reference simulation. The sea ice thickness reduces also in the Eurasian Basin by about 0.25 m to 0.5 m in HR<sub>kpp</sub>, [..<sup>133</sup> ]although it becomes thicker in the Canadian Basin by the same amount.

XR<sub>pp</sub> (Fig. 9c) simulates [..<sup>134</sup> ]more, although thin, sea ice in the Labrador Sea because of the above described fresher and colder North Atlantic and the resulting freeze-over[..<sup>135</sup> ]. The sea ice cover in the Iceland Sea reaches even further south  
20 than in the reference simulation HR<sub>pp</sub>. In contrast, XR<sub>kpp</sub> (Fig. 9d) simulates [..<sup>136</sup> ]similar ice thicknesses and extensions as in HR<sub>pp</sub>, as the Labrador Sea is not freezing over. However, due to colder sea surface temperatures in the Denmark and Fram Strait [..<sup>137</sup> ]than in HR<sub>kpp</sub>, a southern tongue of sea ice extends to Iceland as in HR<sub>pp</sub>. Further, in contrast to HR<sub>kpp</sub> [..<sup>138</sup> ]the recirculating branch of the West Spitsbergen Current does not become [..<sup>139</sup> ]stronger in the XR simulations (not shown).

---

<sup>126</sup>removed: distribution

<sup>127</sup>removed: (Zhang and Rothrock, 2003; Schweiger et al., 2011) (not shown)

<sup>128</sup>removed: generally

<sup>129</sup>removed: (Fig. 9)

<sup>130</sup>removed: The ice cover in HR<sub>pp</sub> reaches far south to Iceland

<sup>131</sup>removed: the Denmark Strait, as described by Müller et al. (2018), but remains close to Greenland's coast in HR

<sup>133</sup>removed: while

<sup>134</sup>removed: much more sea ice reaching the north coasts of Iceland

<sup>135</sup>removed: of the Labrador Sea . Instead

<sup>136</sup>removed: thicker sea ice

<sup>137</sup>removed: because of colder sea surface temperatures. In

<sup>138</sup>removed: ,

<sup>139</sup>removed: not stronger in XR<sub>kpp</sub> (and XR<sub>pp</sub>).

In addition, the near-surface circulation in the Arctic Ocean changes with a T255 atmosphere from a more anticyclonic circulation in the Makarov and Canadian Basin in HR, to a more cyclonic circulation in XR (not shown). A cyclonic circulation enhances the export of cold Arctic Water via the East Greenland Current, causing colder sea surface temperatures in the Nordic Seas. <sup>[..<sup>140</sup>]</sup> The XR models and ER<sub>pp</sub> simulate thinner winter ice in the Canada Basin as well. For both XR it can be explained by an enhanced ice export due to the more cyclonic circulation mentioned above. For ER<sub>pp</sub>, however, it needs to be investigated.

The extent of the Arctic summer ice cover in September is less in the XR than in the HR models (not shown), in particular over the Siberian shelves, which is probably caused by the better resolved T255 atmosphere. KPP again simulates thinner ice in the Canada basin (about  $-0.5$  m).

#### 4.4.2 Southern Ocean

10 The spatial distribution of austral winter (September) sea ice thickness <sup>[..<sup>141</sup>]</sup> in the Southern Ocean of HR<sub>pp</sub> (not shown) is similar to the MPI-ESM1.2-HR described by Müller et al. (2018). The ER and both HR simulations produce an overabundance of open-ocean polynyas in the Weddell Sea (see section 4.5.2). HR<sub>kpp</sub> simulates less and thinner ice in the Weddell Sea than HR<sub>pp</sub>, but otherwise the spatial distribution of sea ice in the Southern Ocean is very similar.

Both XR simulations, but more so XR<sub>pp</sub>, produce thicker sea ice than the other simulations, in particular in the Weddell Sea and close to Antarctica's coasts. The thicker ice in the Weddell Sea emerges in concert with a reduced number of polynyas, so that the warm bias seen in Fig. 2 vanishes. This less frequent occurrence of Weddell Sea polynyas is probably related to a reduced meridional pressure gradient across the Weddell Sea and the ACC (not shown), which in turn reduces the near-surface wind speed <sup>[..<sup>142</sup>]</sup> (as seen in Fig. 1) for the polynya. However, a more detailed investigation is required to explain circulation differences between the T127 and the T255 over the Weddell Sea. In austral summer, the sea ice extends further into the Weddell Sea in both XR simulations (not shown).

### 4.5 Mixed layer depth and diapycnal mixing

#### 4.5.1 Northern hemisphere

The average surface mixed layer depths in March for the northern hemisphere are shown in Fig. 10. We diagnosed the mixed layer depth as the depth where the density deviates from the surface density by  $\sigma_t = 0.01 \text{ kg m}^{-3}$ . This diagnostic was computed from monthly means.

In the reference simulation HR<sub>pp</sub> (Fig. 10a), average depths of up to 1500 m are simulated in the Labrador Sea, and up to 600 m south of Cape Farewell, in the Irminger Sea, and in the Nordic Seas. As discussed before, in XR<sub>pp</sub> (Fig. 10c) the deep

---

<sup>140</sup>removed: Both

<sup>141</sup>removed: distribution

<sup>142</sup>removed: forcing



convection ceases in the Labrador Sea [..<sup>143</sup> ]within the first two decades of the simulation. This collapse of deep convection (ceases also in the Nordic Seas[..<sup>144</sup> ]) leads to a slowing down of the AMOC (Tab. 4) [..<sup>145</sup> ](Putrasahan et al., 2018).

The KPP scheme in HR<sub>kpp</sub> (Fig. 10b) causes much deeper mixed layers in the Labrador Sea and mixed layers depths of about 1000m in the Greenland Sea. In particular the [..<sup>146</sup> ]mixed layer depths in the Labrador and Irminger Sea and south of Greenland (north of 50°N) [..<sup>147</sup> ]become deeper compared to all other models. These deeper mixed layers with the KPP scheme result on one hand from the convection parameterization (i.e. the non-local fluxes) and on the other hand from a stronger and more cyclonic subpolar gyre (Tab. 2) that domes the isopycnals in the gyre centres (not shown), which preconditions the water column for convection.

As mentioned in section 2.2, the non-local fluxes in the KPP scheme use the same vertical diffusivities as for the local gradient transports. These diffusivities are not limited to a user-defined maximum value during convective forcing conditions, so that much larger diffusivities can act to redistribute temperature and salinity throughout the ocean boundary layer, causing the water column to overturn faster and to produce deeper mixed layers in the KPP than in the PP scheme.

On the other hand, XR<sub>kpp</sub> (Fig. 10d) simulates shallower mixed layers compared with HR<sub>kpp</sub>. These shallower mixed layers result from the reduced wind stress of the T255 atmosphere by means of two processes: (1) lower wind stress spins down the subpolar gyre (Tab. 2), so that the slower cyclonic circulation reduces the isopycnal doming and the horizontal salt advection to the gyre centres (Tab. 4), leading to a more stratified surface layer; and (2) lower near-surface wind speeds reduce the turbulent air-sea fluxes via the bulk formula and the surface friction velocity ( $u_*$ ). Lesser heat fluxes in turn reduce directly the non-local fluxes of the KPP scheme in convection areas, and lower  $u_*$  reduces the turbulent vertical velocity scales, which results in lower vertical diffusivities and viscosities.

Based on these results, increasing the atmospheric resolution reduces the mixed layer depths over the North Atlantic and the Nordic Seas, whereas KPP deepens them. By combining both, the T255 atmosphere and the KPP scheme, the above effects compensate (XR<sub>kpp</sub>; Fig. 10d). In contrast to XR<sub>pp</sub>, where the convection ceases in the Labrador and GIN [..<sup>148</sup> ]seas, the combination of T255 and KPP (XR<sub>kpp</sub>) produces more realistic mixed layers depths even with reduced wind [..<sup>149</sup> ]stress.

Overall, the KPP scheme [..<sup>150</sup> ]modifies the large-scale circulation by simulating a stronger subpolar gyre, which in turn provides favourable conditions for deep convection in the Labrador Sea, Irminger Sea, and Nordic Seas. For this reason, HR<sub>kpp</sub> and XR<sub>kpp</sub> simulate enhanced deep convection compared with HR<sub>pp</sub> and thus mixed layers [..<sup>151</sup> ]that are deeper by about 500 to 600 m in the Irminger [..<sup>152</sup> ]Sea, which is consistent with observations (e.g. Pickart et al., 2003; Våge et al., 2008, 2011).

---

<sup>143</sup>removed: and

<sup>144</sup>removed: , leading

<sup>145</sup>removed: .

<sup>146</sup>removed: convection area

<sup>147</sup>removed: becomes

<sup>148</sup>removed: Seas

<sup>149</sup>removed: forcing

<sup>150</sup>removed: influences

<sup>151</sup>removed: deeper of

<sup>152</sup>removed: Gyre

[..<sup>153</sup> ]However, even the T255 atmosphere is too coarse to fully simulate Greenland tip jets [..<sup>154</sup> ](e.g. Martin and Moore, 2007; DuVivier and Cassano, 2016; Gutjahr and Heinemann, 2018), which have a considerable impact on triggering deep convection in the Irminger Sea due to strong associated turbulent heat fluxes, and on forcing the Irminger Gyre.

5 Except for XR<sub>pp</sub>, the maximum mixed layer depths are nevertheless too deep. A possible explanation is the neglect of tidal mixing in MPI-ESM1.2. As shown in Müller et al. (2010), tidal mixing improves the recirculation of the Labrador Current. By dragging more freshwater into the surface layer of the Labrador Sea, it becomes more stratified which in turn reduces deep convection. Another shortcoming is probably too little eddy activity in the Labrador Sea that transport freshwater from the West Greenland Current into the interior of the Labrador Sea (e.g. Eden and Böning, 2002; Kawasaki and Hasumi, 2014).

10 In ER<sub>pp</sub> the mixed layer depths are to a large extent similar to our reference simulation HR<sub>pp</sub>. However, in ER<sub>pp</sub> the convection centre in the Labrador Sea is confined to a more southeastern area with deeper mixed layers, in particular south of Cape Farewell. The deeper mixed [..<sup>155</sup> ]layers might be related to a stronger doming of isopycnals because of an enhanced cyclonic circulation [..<sup>156</sup> ]or recirculating Irminger Current [..<sup>157</sup> ](Pickart et al., 2003; Våge et al., 2011). Another reason might be enhanced advection of Labrador Sea water from the Labrador into the Irminger Basin that preconditions the water south of Cape Farewell for convection. However, the processes that lead to deep convection in the Irminger Sea are complex, and is still not fully understood how eddies affect the preconditioning/trigging of convection and where their main formation area is (Fan et al., 2013; DuVivier and Cassano, 2016).

#### 4.5.2 Southern hemisphere

20 In the Southern Ocean, we define the mixed layer depth as the depth where the density deviates by [..<sup>158</sup> ] $\sigma_t = 0.03 \text{ kg m}^{-3}$  from the surface. MPI-ESM1.2 simulates very deep winter mixed layers in the Weddell and Ross Sea (Fig.11). In the Weddell Sea, the convection reaches down into the deep ocean, which is a known problem in many state-of-the-art ESMs (Sallée et al., 2013; Kjellsson et al., 2015; Heuzé et al., 2015; Naughten et al., 2018). Spurious open-ocean deep convection leads to semi-permanent Weddell Sea polynyas, as warm Circumpolar Deep Water is continuously brought to the surface, causing sea ice to melt so that the ocean becomes exposed to the cold atmosphere.

25 Possible explanations for this widespread bias are: insufficient freshwater input (Kjellsson et al., 2015), in particular glacial melt water (e.g. Stössel et al., 2015), and insufficient wind mixing in summer (Timmermann and Beckmann, 2004). Reduced wind mixing allows salt from brine rejection to accumulate in the winter water layer and eventually to erode the stratification. In both cases, salinity increases in the winter [..<sup>159</sup> ]upper layer until the weakly stratified water column overturns (Naughten et al., 2018).

---

<sup>153</sup>removed: The deeper mixed layers in the Irminger Sea in XR<sub>kpp</sub> are probably linked to better resolved

<sup>154</sup>removed: , although a T255 is still too coarse to resolve them sufficiently (Gutjahr and Heinemann, 2018)

<sup>155</sup>removed: layer depths

<sup>156</sup>removed: (or a

<sup>157</sup>removed: ) (Pickart et al., 2003; Våge et al., 2011)and to

<sup>158</sup>removed:  $0.03 \text{ kg m}^{-3}$  from the density at the

<sup>159</sup>removed: water

The diagnosed mixed layer depth, however, is very sensitive to the chosen density threshold because of the very weakly stratified water column. We decided to apply a commonly used threshold for the Southern Ocean of  $\sigma_t = 0.03 \text{ kg m}^{-3}$  [..<sup>160</sup> ], but note however that if a lower threshold of  $\sigma_t = 0.01 \text{ kg m}^{-3}$  is chosen, the mixed layer depth rarely exceeds 300 m, because of a shallow stratified surface layer.

5 Based on two simulations with the GFDL-ESM with different resolutions of their ocean component ( $0.25^\circ$  and  $0.1^\circ$ ), Dufour et al. (2017) found that deep convection in the Weddell Sea does not necessarily lead to open-ocean polynyas. They argue that excessive vertical mixing in the lower-resolution ocean component hinders the build-up of a heat reservoir at depth that is necessary for Weddell Sea polynyas to occur intermittently as expected under pre-industrial conditions (e.g. de Lavergne et al., 2014; Gordon, 2014). They further argue that the more realistic representation in the higher-resolution simulation stems  
10 from (1) the fact that mesoscale eddies tend to flatten isopycnals thereby increasing the stratification, and (2) the more detailed bathymetry which allows for a better simulation of dense-water overflows.

Based on forced MPIOM and coupled MPI-ESM simulations with varying resolution, Stössel et al. (2015) found that the surface freshwater flux improves because of better represented Southern Ocean winter [..<sup>161</sup> ] sea ice and water properties with a  $0.1^\circ$  (TP6M) ocean component, and by switching from a forced to a coupled simulation. These findings are consistent with  
15 our ER<sub>pp</sub> simulation (Fig. 11e), where the mixed layer depth in the central Weddell Sea reduces in comparison with HR<sub>pp</sub> (Fig. 11a). At the same time, the area of deep mixed layers shifts to the eastern part of the Weddell Sea, close to the Maud Rise plateau, where ER<sub>pp</sub> still simulates very deep mixed layers in September. This, in turn, could be a result of the better resolved bathymetry in this region. Kurtakoti et al. (2018) explained how Maud Rise polynyas formed in a high-resolution ( $0.1^\circ$  ocean component) ESM simulation [..<sup>162</sup> ], while none formed in a low-resolution simulation with the same model. A decisive reason  
20 for this was the steeper and better resolved bathymetry of and around Maud Rise that allowed for sufficiently strong Taylor columns to form.

As for the larger Weddell Sea polynyas, de Lavergne et al. (2014) and Gordon (2014) argue that such should only emerge under pre-industrial conditions. Even though de Lavergne et al. (2014) praise the low-resolution MPI-ESM for belonging to the class of convecting models, Kurtakoti et al. (2018) explain that large-scale Weddell Sea polynyas should only occur  
25 intermittently under pre-industrial conditions and only by growing out from Maud Rise polynyas, which themselves should only occur at high model resolution ( $0.1^\circ$ ). Since the greenhouse gas forcing of the experiments presented here being fixed at the 1950 level, one would expect the Southern Ocean of the model to already have adjusted to the present-day situation when no Weddell Sea polynyas are expected to occur (due to the southward shift of the precipitation rich westerlies). Strong convection and large Weddell Sea polynyas, as implied by the perpetual large regions of excessively deep mixed layers (Fig. 11), should  
30 thus be viewed as an unrealistic behaviour.

As suggested by Timmermann and Beckmann (2004), the vertical mixing scheme affects the sensitivity of spurious deep convection in the Weddell Sea. According to Kjellsson et al. (2015) and Timmermann and Beckmann (2004), sufficient vertical

---

<sup>160</sup>removed: . Note

<sup>161</sup>removed: sea-ice

<sup>162</sup>removed: while none

mixing is required in the top 100 m of the mixed layer in the Weddell Sea to prevent polynya formation. However, we chose to reduce the wind induced mixing quadratically with an increased sea ice cover (PP and KPP scheme) in MPI-ESM1.2, which might result in too less mixing under sea ice and thus might also partly explain the deep convection in the Weddell Sea in our simulations. We neglect here that wind induced mixing could increase with increasing sea ice concentration (and could be even larger than for open-ocean conditions), when the momentum flux from the atmosphere to the ocean will be taken over by the ice-ocean stress. Although the KPP scheme reduces the mixed layer depths in the Ross Sea, it enhances deep convection in the central ( $HR_{kpp}$ ) and in the eastern part of the Weddell Sea ( $XR_{kpp}$ ). This enhanced deep convection contribute to the enhanced ACC strength in the Drake Passage (Tab. 3), as it causes a steepening of the isopycnals across the ACC and thus an increased geostrophic flow (Jungclaus et al., 2013; Stössel et al., 2015; Naughten et al., 2018). This might further indicate that the eddy activity is too low in the KPP simulations, so that isopycnals remain too steep and the water too weakly stratified.

Besides the resolution of the ocean component and the choice of the vertical ocean mixing scheme, a higher resolution of the atmosphere component has also a distinct effect on the simulated winter mixed layer depth (Fig. 11c versus 11a and Fig. 11d versus 11b), which is related to the reduced meridional pressure gradient (not shown) over the Weddell Sea. Stössel et al. (2015) found an improvement of the high-latitude Southern Ocean water-mass properties and winter sea ice cover in a simulation, where the high-resolution (TP6M) MPIOM was coupled to a T255 atmosphere (ECHAM6) compared to a coupled simulation with a TP6M ocean and T63 atmosphere. In terms of the ocean mixed layer depth, our results support these earlier findings, as also indicated by the reduction of the ACC to more realistic values (Tab. 3).

In all our model simulations shown here, sea ice salinity has a constant value of  $5 \text{ g kg}^{-1}$ . As explained in Stössel et al. (2015), Vancoppenolle et al. (2009) and Hunke et al. (2011) argue for a sea ice salinity of about  $8 \text{ g kg}^{-1}$  for first-year ice, i.e. the kind of sea ice mostly found around Antarctica. Such a higher value would reduce the amount of brine release during ice formation, and thus favoring a more stable upper-ocean water column in fall and winter. Another issue is the ice export from the coast: if too weak, it will strengthen open-ocean convection at the expense of near-boundary convection (e.g. Stössel et al., 2015; Haumann et al., 2016).

Another modelling challenge is the mixed layer depth in the Subantarctic Frontal zone equatorwards of the ACC (Rintoul and Trull, 2001); an important area for heat and  $\text{CO}_2$  uptake and for the formation of the Subantarctic Mode Water. State-of-the-art ocean models simulate very shallow mixed layers between  $40$  to  $60^\circ\text{S}$  in comparison to Argo float observations (DuVivier et al., 2018). This discrepancy is in particular large in September, when the Argo floats show mixed layer depths of about  $400 \text{ m}$  (see Fig.2 in DuVivier et al. (2018)), but which can reach depths of  $700 \text{ m}$  (Holte et al., 2017).

The main reason is that the ocean boundary layer in the models is not penetrating deep enough into the stratified subsurface ocean, where a high saline layer with its maximum at  $150$  to  $200 \text{ m}$  depth is observed that originates from the Agulhas retroflection and is modified in a complex way by Ekman transport and pumping/suction. This subsurface salinity maximum builds up over spring and early summer and is mixed out in September. It is expected that the mixed layer

---

<sup>163</sup>removed: sea-ice

<sup>164</sup>removed: sea-ice

<sup>165</sup>removed: sea-ice

<sup>166</sup>removed: provide for

depths increase by either increasing the horizontal resolution, as the complex circulation improves, or by improving the physics of vertical mixing parameterizations (DuVivier et al., 2018) allowing deeper penetrations of the ocean boundary layer into the subsurface salinity core.

Our reference simulation ( $HR_{pp}$ ) simulates only mixed layer depths of about 200 to 300 m (Fig. A9a). Deeper mixed layers are, however, simulated by either using the KPP scheme ( $HR_{kpp}$ ; Fig. A9c) or by increasing the ocean resolution ( $ER_{pp}$ ; Fig. A9e). Deeper mixed layers with an eddy-resolving ocean of  $0.1^\circ$  were also found for other models (Lee et al., 2011; Small et al., 2014; Li and Lee, 2017). However, the reason for improved mixed layer depth with high resolution is still unclear, and might be due to changes in circulation, local stratification or indirectly due to vertical and lateral physics (DuVivier et al., 2018). As already suspected by DuVivier et al. (2018), the nonlocal transport terms of the KPP scheme seem to favour deeper penetrations of the boundary layer into the stratified high salinity maximum below, although this happens in too wide a latitude band.

In  $ER_{pp}$ , the deep mixed layers are sharply confined to the observed latitudinal band between  $40$  to  $60^\circ S$ . However, they might be too deep compared to the Argo float estimations, for reasons that need to be further investigated. Nevertheless, the simulation of deeper mixed layers seems to be more realistic, which gives fidelity to our models with either an eddy-resolving ocean or using KPP.

#### 4.6 Atlantic meridional overturning circulation

The large-scale global meridional overturning circulation (MOC) is an important carrier of heat and freshwater in the climate system. The Atlantic MOC (AMOC) is considered to be the strongest part of the MOC (Trenberth and Caron, 2001). The North Atlantic contributes about 25% of the total poleward heat flux (ocean plus atmosphere) (Srokosz and Bryden, 2015; Lozier et al., 2017). The meridional transport of heat and salt follows the zonally integrated volume transport that, when facing west, emerges a clockwise rotating NADW cell and a counterclockwise rotating Antarctic Bottom Water (AABW) cell.

Fig. 12 shows the associated meridional overturning volume transport stream function, or AMOC, of all 5 simulations [..<sup>167</sup>] and Tab. 4 shows the time-mean AMOC strength at  $26^\circ N$  at 1000 m depth, as well as the heat and salt transports across  $50^\circ N$ . The time-mean of the AMOC is about  $14.9 Sv$  in  $HR_{pp}$  and comparable to the  $16 Sv$  of the MPI-ESM1.2-HR described by Müller et al. (2018). It is slightly lower than the observed mean value ( $\pm$  one standard deviation) of  $17 \pm 4.4 Sv$  (Apr 2004 to Feb 2017) from the RAPID array (McCarthy et al., 2015; Smeed et al., 2017).  $HR_{kpp}$  simulates a stronger AMOC of  $18.9 Sv$ , which is the largest value of all our simulations. A possible explanation for this is given below. The volume transport of the overflow waters across the Greenland-Scotland ridge are also slightly higher with the KPP scheme (Tab. 3). After the overflow waters descend along the continental slopes and mix with ambient water masses, they contribute to a stronger NADW cell (Dickson and Brown, 1994) in the KPP simulations.

Figure 12f shows vertical profiles of the AMOC at  $26.5^\circ N$  in comparison to the RAPID data. All simulations (except  $XR_{pp}$ ) produce transports close to the observations. The volume transport of  $HR_{kpp}$ , however, is on the stronger side of the

---

<sup>167</sup>removed: , while

observations, whereas the transport of the other simulations are on the lower side of the observations. All models show a too strong southward transport of NADW below 2000 m, which suggests a too strong Deep Western Boundary Current.

The reduced wind stress from ECHAM6.3 at T255 results in the above mentioned slowdown of the AMOC in XR<sub>pp</sub>. In this simulation, the NADW cell reaches a maximum volume transport of only about 11.0 Sv, which is slightly higher than the 9.0 Sv reported by Putrasahan et al. (2018). This discrepancy is because we analyze an earlier period of the same XR<sub>pp</sub> simulation when the AMOC is still drifting to lower values. An important finding [..<sup>168</sup>] is that XR<sub>kpp</sub> [..<sup>169</sup>] simulates a stable AMOC (14.6 Sv [..<sup>170</sup>]), despite the weak wind stress with the T255 atmosphere. In terms of volume transport, going to an eddy resolving ocean resolution (ER<sub>pp</sub>) does not increase the strength of the NADW [..<sup>171</sup>] cell. This finding is opposite to what Hewitt et al. (2016) and Storkey et al. (2018) found.

However, its bottom (AABW) cell becomes stronger (Fig. 12e), which might be because of similar effects as described by Sein et al. (2018), who hypothesize that eddy-induced transport acts to flatten the outcropping isopycnals in the Southern Ocean. So eddies counteract a wind-induced steepening of isopycnals, while at the same time, a stronger vertical gradient between the AABW and the warmer ambient ocean is maintained. The flatter isopycnals reduce the vertical mixing because of a more stratified water column, as indicated by the reduced mixed layer depths in the Weddell Sea in ER (Fig. 11e). Reduced convection maintains denser AABW, seen by sharper gradients of temperature and salinity in ER (Fig. [..<sup>172</sup>] A4e) and it theoretically helps to build up a deep heat reservoir (Dufour et al., 2017) that is required for intermittent Weddell Sea polynyas. However, in our ER simulation, Weddell Sea polynyas still form too frequently. On the other hand, better resolved bathymetry might also be important for the AABW formation over the continental shelves, which is partly resolved in ER.

We define the depth of the NADW cell as the depth where the volume transport crosses the zero line in Fig. 12f. The observed annual mean depth ( $\pm$  one standard deviation) of the NADW cell (Tab. 4) from the RAPID data is about  $4379 \pm 279$  m at  $26.5^\circ$  N. All our simulations reveal shallower NADW cells of around 3000 m, but with a noticeable tendency to become deeper with the KPP scheme. A stronger AMOC deepens the NADW cell (Marshall et al., 2017), because more NADW is formed by overturning. This is consistent with the mixed layers [..<sup>173</sup>] being deeper in the KPP simulations, and with the increased overflow water from the GIN seas (Tab. 3).

In XR<sub>pp</sub> the NADW cell is shallower (2665 m), consistent with a much weaker NADW cell. ER<sub>pp</sub> simulates a slightly deeper (2941 m) NADW cell than HR<sub>pp</sub>, probably because of increased overflow water from the GIN seas (Tab. 3), but still not as deep as in the simulations with the KPP scheme. The higher volume transport [..<sup>174</sup>] by the AMOC in the simulations with KPP yields a slightly enhanced heat transport and a considerably higher salt transport across  $50^\circ$  N (Tab. 4, Fig. A1). This larger salt

<sup>168</sup>removed: of this study

<sup>169</sup>removed: , featuring reduced surface winds, results in a similarly strong AMOC of

<sup>170</sup>removed: as in HR<sub>pp</sub> and ER<sub>pp</sub>

<sup>171</sup>removed: )

<sup>172</sup>removed: A3

<sup>173</sup>removed: being

<sup>174</sup>removed: of the AMOC with the KPP scheme



input into the subpolar North Atlantic with KPP is a main reason why the overturning becomes stronger, and in particular why  $XR_{kpp}$  maintains a stable AMOC, even [..<sup>175</sup> ]with reduced wind stress.

The stronger deep convection in the northern North Atlantic (Labrador and Irminger Sea) and in the Nordic Seas enhance the local NADW formation that deepens the NADW cell. Note, however, that open-ocean deep convection is not directly associated with a net vertical mass transport [..<sup>176</sup> ](Marotzke and Scott, 1999; Katsman et al., 2018) and thus the location of convective mixing and of strongest downward mass transfer need not coincide.

The surplus of NADW water has to be replaced by water masses from the NAC, leading to larger volume and salt transports of this current. Once the upper cell in the Atlantic becomes stronger, a positive feedback sets in. A stronger NAC strengthens the cyclonic circulation of the subpolar gyre (Tab. 2) and the separation of water masses in the gyre centres (Labrador/Irminger Sea) from the ambient water masses. This separation of water masses in the gyre centres enhances deep convection because of (1) increased isopycnal doming that leads to a weaker stratification of the water column and to a shallower thermocline, and (2) because of reduced mixing with ambient water, so that the water masses in the gyre centre are exposed longer to the overlying cold atmosphere, leading to [..<sup>177</sup> ]increased heat loss. Both effects reduce the surface stratification [..<sup>178</sup> ]and its resistance to erosion, favouring deep convection that again strengthens the overturning cell. In addition, increased salt input densifies the upper water masses of the northern North Atlantic and the Nordic Seas, so that convection is enhanced.

As a result of the enhanced AMOC, the adiabatic upwelling branch of the MOC south of the ACC has to become stronger too (Fig. [..<sup>179</sup> ]A4). Since [..<sup>180</sup> ]we use the same background diffusivities below the mixed layer [..<sup>181</sup> ]in KPP as with PP, no significant differences in diapycnal diffusion occur in the Pacific (not shown). That is, the only return pathway that might be modified by KPP is via wind-driven adiabatic upwelling in the Southern Ocean (Marshall and Speer, 2012). Indeed, the upwelling in the Pacific sector of the Southern Ocean increases with KPP (Fig. A4). An increase in upwelling in the Southern Ocean further strengthens the northern cell (Marshall et al., 2017). This feedback is however acting on longer time scales than the slowdown of the AMOC in our model. Therefore, the Southern Ocean is not the main factor in sustaining a stable AMOC in  $XR_{kpp}$ .

## 5 Summary

We compared control simulations of various MPI-ESM1.2 configurations following the HighResMIP protocol and investigated separately the resolution effects of the atmosphere and ocean model configurations and the effects of an alternative diapycnal ocean mixing scheme on the mean state of the atmosphere and ocean.

---

<sup>175</sup>removed: under reduced wind forcing

<sup>176</sup>removed: (Marotzke and Scott, 1999)

<sup>177</sup>removed: an

<sup>178</sup>removed: that could be easily eroded, which favours deep convection and

<sup>179</sup>removed: A2

<sup>180</sup>removed: KPP uses

<sup>181</sup>removed: as with the PP scheme, no significantly different diapycnal diffusion occurs



## 5.1 Eddy-resolving ocean

An eddy-resolving ocean reduces biases in the ocean [mean-state](#) and it has a major impact on the large-scale temperature distribution in the atmosphere. [\[..<sup>182</sup>\]](#) [Cold temperature biases in the Southern Hemisphere, and to a lesser extent in the Northern Hemisphere, are reduced.](#) The latter bias could not be removed by just increasing the atmospheric resolution. In the ocean, warm and saline bias in the Southern Atlantic were removed, because of the better representation of the Agulhas Current system (Putrasahan et al., 2015; Cheng et al., 2016) and because of eddy-induced upward transport of fresh and cold water masses, as described in von Storch et al. (2016). In [general, swifter and narrower boundary currents are simulated in all basins with an eddy-resolving resolution.](#) In the North Atlantic, the warm and saline bias was removed because of a better simulation of the water properties of the outflowing Mediterranean Water. An eddy-resolving ocean improves the separation of the Gulf Stream, although the NAC remained still too zonal in our simulation. Furthermore, the warm bias of the Atlantic Layer in the Arctic Ocean was removed, probably because of reduced numerical mixing due to the higher resolution, which confirms the results of Wang et al. (2018). [\[..<sup>183</sup>\]](#) [In addition,](#) the deep-convection centre shifted to the southeast in the Labrador Sea, and to the east in the Weddell Sea. [An eddy-resolving resolution was also found to improve the mixed layer depths in the Subantarctic Frontal zone in the India, Australian and Pacific sectors of the Southern Ocean.](#)

## 5.2 A T255 resolution for the atmosphere

A [\[..<sup>184</sup>\]](#) T255 atmosphere [\[..<sup>185</sup>\]](#) [reduced mainly the wind stress on the ocean](#) in both hemispheres, in particular in the Labrador Sea and in the Weddell Sea. In the [\[..<sup>186</sup>\]](#) [latter, a reduced meridional pressure gradient in the atmosphere reduces the ACC transport \[..<sup>187</sup>\]](#) to realistic values, as [also](#) reported by Stössel et al. (2015), [\[..<sup>188</sup>\]](#) [and further](#) reduces the wind [\[..<sup>189</sup>\]](#) [stress over](#) the Weddell Sea polynya. As with an eddy-resolving ocean, the centre of deep convection in the Weddell Sea shifts to the east, to the vicinity of the Maud Rise Plateau. In the northern hemisphere [however,](#) a T255 atmosphere reduces the near-surface wind speeds over the subpolar gyre [\[..<sup>190</sup>\]](#), [so that](#) the subpolar gyre slows down and because of less cyclonic movement and less salt advection into the gyre centres, the deep convection reduces (KPP scheme) or completely ceases (PP scheme) [\[..<sup>191</sup>\]](#), as described by Putrasahan et al. (2018). In contrast to the near-surface, the jet streams became [however](#) stronger with a T255 atmosphere.

---

<sup>182</sup>removed: In the atmosphere, the cold biases above the Northern hemisphere were removed, but in particular the cold bias above the ACC

<sup>183</sup>removed: Finally

<sup>184</sup>removed: main improvement with a

<sup>185</sup>removed: are reduced mixed layer depths

<sup>186</sup>removed: Weddell Sea,

<sup>187</sup>removed: reduces

<sup>188</sup>removed: because of a reduced meridional pressure gradient in the atmosphere across the ACC. Further the reduced pressure gradient above the Weddell

Sea

<sup>189</sup>removed: forcing of

<sup>190</sup>removed: . With a reduced wind forcing,

<sup>191</sup>removed: with a slowdown of the AMOC

### 5.3 Effects of the KPP scheme

The main effects of the KPP scheme are stronger deep convection in both hemispheres, as seen by the mixed layer depths. Under convective forcing the non-local fluxes of the KPP scheme produce much higher diffusivities compared with the enhanced diffusivity parameterization that we use for the PP scheme. This stronger deep convection with the KPP scheme produces more local NADW in the convection centres (Labrador, Irminger, and GIN Seas) which in turn strengthens the AMOC. When coupled with the T255 atmosphere, the AMOC remains stable with the KPP scheme because of this enhanced overturning, which produces sufficient NADW to maintain a strong enough upper cell. Another effect of producing deeper mixed layer is a stronger subpolar gyre that domes the isopycnals and helps to precondition the water column for convection. This is also true for the Weddell Gyre with the same effect. [We further found deeper mixed layers in the Subantarctic Frontal zones, which are important for the uptake of heat and CO<sub>2</sub>.](#) The stronger AMOC transports more salt and heat into the North Atlantic, so that the cold bias in the northern hemisphere is removed (except in the upper troposphere).

*Code and data availability.* The MPI-ESM1.2 model code is made available under a version of the MPI-M Software License Agreement (<http://www.mpimet.mpg.de/en/science/models/license>; branch *mpiesm-1.2.01-cvmix* for the KPP simulations and *mpiesm-1.2.01-primavera\_PP* for the PP simulations). Primary data and scripts used in the analysis, and other supplementary information that may be useful in reproducing the author's work, are archived by the Max Planck Institute for Meteorology and can be obtained by contacting [publications@mpimet.mpg.de](mailto:publications@mpimet.mpg.de).

*Author contributions.* JJ and JS designed the experiments and DP and KL set up the model configurations and performed the simulations. OG, NB and HH have implemented the new mixing parameterizations in MPIOM. OG prepared the manuscript with contributions from all co-authors.

*Competing interests.* The authors declare that they have no conflict of interest.

*Acknowledgements.* We thank the German Computing Centre (DKRZ) for providing the computing resources. This research was funded by the EU Horizon 2020 project PRIMAVERA (grant number 641727). This paper is a contribution to the project S2 (Improved parameterisations and numerics in climate models) of the Collaborative Research Centre TRR 181 "Energy Transfer in Atmosphere and Ocean" funded by the Deutsche Forschungsgemeinschaft (DFG, German Research Foundation) - project number 274762653. JJ acknowledges support by the German BMBF RACE-II project (FKZ 03F0729D). We thank Jürgen Kröger for proofreading the manuscript. [The OSI SAF data of EU-METSAT were made available from <http://osisaf.met.no>. Finally, we thank two anonymous reviewers for their constructive and helpful comments.](#)

## References

- Aderoft, A. J., Hill, C., and Marshall, J.: Representation of Topography by Shaved Cells in a Height Coordinate Ocean Model, *Mon. Weather Rev.*, 125, 2293–2315, [https://doi.org/10.1175/1520-0493\(1997\)125<2293:ROTBSC>2.0.CO;2](https://doi.org/10.1175/1520-0493(1997)125<2293:ROTBSC>2.0.CO;2), 1997.
- Bacon, S.: Circulation and Fluxes in the North Atlantic between Greenland and Ireland, *J. Phys. Oceanogr.*, 27, 1420–1435, [https://doi.org/10.1175/1520-0485\(1997\)027<1420:CAFITN>2.0.CO;2](https://doi.org/10.1175/1520-0485(1997)027<1420:CAFITN>2.0.CO;2), 1997.
- 5 Bersch, M.: On the circulation of the northeastern North Atlantic, *Deep-Sea Res. Pt. I*, 42, 1583–1607, [https://doi.org/10.1016/0967-0637\(95\)00071-D](https://doi.org/10.1016/0967-0637(95)00071-D), 1995.
- Bryden, H. L., Candela, J., and Kinder, T. H.: Exchange through the Strait of Gibraltar, *Prog. Oceanogr.*, 33, 201–248, [https://doi.org/10.1016/0079-6611\(94\)90028-0](https://doi.org/10.1016/0079-6611(94)90028-0), 1994.
- 10 Cheng, Y., Putrasahan, D., Beal, L., and Kirtman, B.: Quantifying Agulhas Leakage in a High-Resolution Climate Model, *J. Climate*, 29, 6881–6892, <https://doi.org/10.1175/JCLI-D-15-0568.1>, 2016.
- Cheng, Y., Beal, L. M., Kirtman, B. P., and Putrasahan, D.: Interannual Agulhas Leakage Variability and its Regional Climate Imprints, *J. Climate*, 31, 10 105–10 121, <https://doi.org/10.1175/JCLI-D-17-0647.1>, 2018.
- Clark, R. A.: Transport through the Cape Farewell-Flemish Cap section, *Rapp. P. V. Reun. Cons. Int. Explor. Mer.*, 185, 120–130, 1984.
- 15 Cunningham, S. A., Alderson, S. G., King, B. A., and Brandon, M. A.: Transport and variability of the Antarctic circumpolar current in Drake Passage, *J. Geophys. Res.*, 108 (C5), 8084, <https://doi.org/10.1029/2001JC001147>, 2003.
- de Lavergne, C., Palter, J. B., Galbraith, E. D., Bernardello, R., and Marinov, I.: Cessation of deep convection in the open Southern Ocean under anthropogenic climate change, *Climate Change*, 4, 278–282, <https://doi.org/10.1038/nclimate2132>, 2014.
- Dee, D. P., Uppala, S. M., Simmons, A. J., Berrisford, P., Poli, P., Kobayashi, S., Andrae, U., Balmaseda, M. A., Balsamo, G., Bauer, P., 20 Bechtold, P., Beljaars, A. C. M., van de Berg, L., Bidlot, J., Bormann, N., Delsol, C., Dragani, R., Fuentes, M., Geer, A. J., Haimberger, L., Healy, S. B., Hersbach, H., Hólm, E. V., Isaksen, I., Kåberg, P., Köhler, M., Matricardi, M., McNally, A. P., Monge-Sanz, B. M., Morcrette, J.-J., Park, B.-K., Peubey, C., de Rosnay, P., Tavolato, C., Thépaut, J.-N., and Vitart, F.: The ERA-Interim reanalysis: configuration and performance of the data assimilation system, *Q. J. R. Meteorol. Soc.*, 137, 553–597, <https://doi.org/10.1002/qj.828>, 2011.
- Dengg, J. A., Beckmann, A., and Gerdes, R.: The Warmwatersphere of the North Atlantic Ocean, chap. The Gulf Stream separation problem, 25 pp. 253–290, Gebr. Bornträger, Berlin, 1996.
- Dickson, R. R. and Brown, J.: The production of North Atlantic Deep Water: Sources, rates, and pathways, *J. Geophys. Res.*, 99, 12 319–12 341, <https://doi.org/10.1029/94JC00530>, 1994.
- DiMarco, S. F., Chapman, P., Nowlin Jr., W. D., Hacker, P., Donohue, K., Luther, M., Johnson, G. C., and Toole, J.: Volume transport and property distribution of the Mozambique Channel, *Deep-Sea Res. II*, 49, 1481–1511, [https://doi.org/10.1016/S0967-0645\(01\)00159-X](https://doi.org/10.1016/S0967-0645(01)00159-X), 30 2002.
- Donohue, K. A., Tracey, K. L., Watts, D. R., Chidichimo, M. P., and Chereskin, T. K.: Mean Antarctic Circumpolar Current transport measured in Drake Passage, *Geophys. Res. Lett.*, 43, 11 760–11 767, <https://doi.org/10.1002/2016GL070319>, 2016.
- Drews, A., Greatbatch, R. J., Ding, H., Latif, M., and Park, W.: The use of a flow field correction technique for alleviating the North Atlantic cold bias with application to the Kiel Climate Model, *Ocean Dyn.*, 65(8), 1079–1093, <https://doi.org/10.1007/s10236-015-0853-7>, 2015.
- 35 Dufour, C. O., Morrison, A. K., Griffies, S. M., Frenger, I., Zanowski, H., and Winton, M.: Preconditioning of the Weddell Sea Polynya by the Ocean Mesoscale and Dense Water Overflows, *J. Climate*, 30, 7719–7737, <https://doi.org/10.1175/JCLI-D-16-0586.1>, 2017.

- DuVivier, A. K. and Cassano, J. J.: Comparison of wintertime mesoscale winds over the ocean around southeastern Greenland in WRF and ERA-Interim, *Clim. Dynam.*, 46, 2197–2211, <https://doi.org/10.1007/s00382-015-2697-8>, 2016.
- DuVivier, A. K., Large, W. G., and Small, R. J.: Argo observations of the deep mixing band in the Southern Ocean: A salinity modeling challenge., *J. Geophys. Res. Oceans*, 123, 7599–7617, <https://doi.org/10.1029/2018JC014275>, 2018.
- 5 Eden, C. and Böning, C.: Sources of Eddy Kinetic Energy in the Labrador Sea, *J. Phys. Oceanogr.*, 32, 3346–3363, [https://doi.org/10.1175/1520-0485\(2002\)032<3346:SOEKEI>2.0.CO;2](https://doi.org/10.1175/1520-0485(2002)032<3346:SOEKEI>2.0.CO;2), 2002.
- EUMETSAT Ocean and Sea Ice Satellite Application: Global sea ice concentration reprocessing dataset 1978-2015 (v1.2, 2015), [Online], <http://osisaf.met.no>, Norwegian and Danish Meteorological Institutes, 2015.
- Eyring, V., Bony, S., Meehl, G. A., Senior, C. A., Stevens, B., Stouffer, R. J., and Taylor, K. E.: Overview of the Coupled Model Intercomparison Project Phase 6 (CMIP6) experimental design and organization, *Geoscientific Model Development*, 9, 1937–1958, <https://doi.org/10.5194/gmd-9-1937-2016>, 2016.
- 10 Fahrbach, E., Meincke, J., Østerhus, S., Rohardt, G., Schauer, U., Tverberg, V., and Verduin, J.: Direct measurements of volume transports through Fram Strait, *Polar Research*, 20, 217–224, <https://doi.org/10.1111/j.1751-8369.2001.tb00059.x>, 2006.
- Fan, X., Send, U., Testor, P., Karstensen, J., and Lherminier, P.: Observations of Irminger Sea Anticyclonic Eddies, *J. Phys. Oceanogr.*, 43, 805–823, <https://doi.org/10.1175/JPO-D-11-0155.1>, 2013.
- 15 Frenger, I., Gruber, R., Knutti, R., and Münnich, M.: Imprint of Southern Ocean eddies on winds, clouds and rainfall, *Nat. Geosci.*, 6, 608–612, <https://doi.org/10.1038/ngeo1863>, 2013.
- Gent, P. R.: A commentary on the Atlantic meridional overturning circulation stability in climate models, *Ocean Model.*, 122, 57–66, <https://doi.org/10.1016/j.ocemod.2017.12.006>, 2018.
- 20 Gent, P. R., Willebrand, J., McDougall, T. J., and McWilliams, J. C.: Parameterizing Eddy-Induced Tracer Transports in Ocean Circulation Models, *J. Phys. Oceanogr.*, 25, 463–474, [https://doi.org/10.1175/1520-0485\(1995\)025<0463:PEITTI>2.0.CO;2](https://doi.org/10.1175/1520-0485(1995)025<0463:PEITTI>2.0.CO;2), 1995.
- Giorgetta, M. A., Jungclauss, J., Reick, C. H., Legutke, S., Bader, J., Böttinger, M., Brovkin, V., Crueger, T., Esch, M., Fieg, K., Glushak, K., Gayler, V., Haak, H., Hollweg, H.-D., Ilyina, T., Kinne, S., Kornblueh, L., Matei, D., Mauritsen, T., Mikolajewicz, U., Mueller, W., Notz, D., Pithan, F., Raddatz, T., Rast, S., Redler, R., Roeckner, E., Schmidt, H., Schnur, R., Segschneider, J., Six, K. D., Stockhause, M., Timmreck, C., Wegner, J., Widmann, H., Wieners, K.-H., Claussen, M., Marotzke, J., and Stevens, B.: Climate and carbon cycle changes from 1850 to 2100 in MPI-ESM simulations for the Coupled Model Intercomparison Project phase 5, *J. Adv. Model. Earth Syst.*, 5, 572–597, <https://doi.org/10.1002/jame.20038>, 2013.
- 25 Good, S. A., Martin, M. J., and Rayner, N. A.: EN4: quality controlled ocean temperature and salinity profiles and monthly objective analyses with uncertainty estimates, *J. Geophys. Res.*, 118, 6704–6716, <https://doi.org/10.1002/2013JC009067>, 2013.
- 30 Gordon, A. L.: Southern Ocean polynya, *Nature Clim. Change*, 4, 249–250, <https://doi.org/10.1038/nclimate2179>, 2014.
- Gordon, A. L., Sprinthal, J., Van Aken, H. M., Susanto, D., Wijffels, S., Molcard, R., Field, A., Pranowo, W., and Wirasantosa, S.: The Indonesian throughflow during 2004–2006 as observed by the INSTANT program, *Dyn. Atmos. Oceans*, 50, 115–128, <https://doi.org/10.1016/j.dynatnoce.2009.12.002>, 2010.
- Griffies, S. M., Levy, M., Adcroft, A. J., Danabasoglu, R., Hallberg, R. W., Jacobsen, D., Large, W., and Ringler, T. D.: Theory and numerics of the Community Ocean Vertical Mixing (CVMix) Project, Tech. rep., <https://github.com/CVMix/CVMix-description>, 2013.
- 35 Griffies, S. M. et al.: Coordinated ocean-ice reference experiments (COREs), *Ocean Model.*, 26, 1–46, <https://doi.org/10.1016/j.ocemod.2008.08.007>, 2009.

- Gutjahr, O. and Heinemann, G.: A model-based comparison of extreme winds in the Arctic and around Greenland, *Int. J. Climatol.*, 38, 5272–5292, <https://doi.org/10.1002/joc.5729>, 2018.
- Haarsma, R. J., Roberts, M. J., Vidale, P. L., Senior, C. A., Bellucci, A., Bao, Q., Chang, P., Corti, S., Fučkar, N. S., Guemas, V., von Hardenberg, J., Hazeleger, W., Kodama, C., Koenigk, T., Leung, L. R., Lu, J., Luo, J.-J., Mao, J., Mizielinski, M. S., Mizuta, R., Nobre, P., Satoh, M., Scoccimarro, E., Semmler, T., Small, J., and von Storch, J.-S.: High Resolution Model Intercomparison Project (HighResMIP v1.0) for CMIP6, *Geosci. Model Dev.*, 9, 4185–4208, <https://doi.org/10.5194/gmd-9-4185-2016>, 2016.
- Hagemann, S. and Gates, L. D.: Improving a subgrid runoff parameterization scheme for climate models by the use of a high resolution data derived from satellite observations, *Climate Dyn.*, 21, 349–359, <https://doi.org/10.1007/s00382-003-0349-x>, 2003.
- Hansen, B., Østerhus, S., Turrell, W. R., Jónsson, S., Valdimarsson, H., Hátún, H., and Olsen, S. M.: The Inflow of Atlantic Water, Heat, and Salt to the Nordic Seas Across the Greenland–Scotland Ridge, pp. 15–43, Springer Netherlands, Dordrecht, [https://doi.org/10.1007/978-1-4020-6774-7\\_2](https://doi.org/10.1007/978-1-4020-6774-7_2), 2008.
- Haumann, F. A., Gruber, N., Münnich, M., Frenger, I., and Kern, S.: Sea-ice transport driving Southern Ocean salinity and its recent trends, *Nature*, 537(7618), 89–92, <https://doi.org/10.1038/nature19101>, 2016.
- Hertwig, E., von Storch, J.-S., Handorf, D., Dethloff, K., Fast, I., and Krismer, T.: Effect of horizontal resolution on ECHAM6-AMIP performance, *Clim. Dyn.*, 45, 185–211, <https://doi.org/10.1007/s00382-014-2396-x>, 2015.
- Heuzé, C., Ridley, J. K., Calvert, D., Stevens, D. P., and Heywood, K. J.: Increasing vertical mixing to reduce Southern Ocean deep convection in NEMO3.4, *Geoscientific Model Development*, 8, 3119–3130, <https://doi.org/10.5194/gmd-8-3119-2015>, 2015.
- Hewitt, H. T., Roberts, M. J., Hyder, P., Graham, T., Rae, J., Belcher, S. E., et al.: The impact of resolving the Rossby radius at mid-latitudes in the ocean: Results from a high-resolution version of the Met Office GC2 coupled model, *Geosci. Model Dev.*, 9, 3655–3670, <https://doi.org/10.5194/gmd-9-3655-2016>, 2016.
- Holliday, N. P., Bacon, S., Allen, J., and McDonagh, E. L.: Circulation and transport in the western boundary currents at Cape Farewell, Greenland., *J. Phys. Oceanogr.*, 39 (8), 1854–1870, <https://doi.org/10.1175/2009JPO4160.1>, 2009.
- Holloway, G., Dupont, F., Golubeva, E., Haekkinen, S., Hunke, E., Jin, M., Karcher, M., Kauker, F., Maltrud, M., Maqueda, M. A. M., Maslowski, W., Platov, G., Stark, D., Steele, M., Suzuki, T., Wang, J., and Zhang, J.: Water properties and circulation in Arctic Ocean models, *Geophys. Res. Oceans*, 112, C04S03, <https://doi.org/10.1029/2006JC003642>, 2007.
- Holte, J., Talley, L. D., Gilson, J., and Roemmich, D.: An Argo mixed layer climatology and database, *Geophys. Res. Lett.*, 44, 5618–5626, <https://doi.org/10.1002/2017GL073426>, 2017.
- Hunke, E. C., Notz, D., Turnker, A. K., and Vancoppenolle, M.: The multiphase physics of sea ice: a review for model developers, *Cryosphere*, 27, 3784–3801, <https://doi.org/10.5194/tc-5-989-2011>, 2011.
- Ilicak, M., Drange, H., Wang, Q., et al.: An assessment of the Arctic Ocean in a suite of interannual CORE-II simulations. Part III: Hydrography and fluxes, *Ocean Model.*, 100, 141–161, <https://doi.org/10.1016/j.ocemod.2016.02.004>, 2016.
- Imawaki, S., Uchida, H., Ichikawa, H., Fukasawa, M., Umatani, S., and ASUKA Group: Satellite altimeter monitoring the Kuroshio Transport south of Japan, *Geophys. Res. Lett.*, 28, 17–20, <https://doi.org/10.1029/2000GL011796>, 2001.
- Jochumsen, K., Quadfasel, D., Valdimarsson, H., and Jónsson, S.: Variability of the Denmark Strait overflow: Moored time series from 1996–2011, *J. Geophys. Res.*, 117, C12 003, <https://doi.org/10.1029/2012JC008244>, 2012.
- Jochumsen, K., Moritz, M., Nunes, N., Quadfasel, D., Larsen, K. M. H., Hansen, B., Valdimarsson, H., and Jonsson, S.: Revised transport estimates of the Denmark Strait overflow, *J. Geophys. Res.*, 122, 3434–3450, 2017.

- Johns, W., Shay, T., Bane, J., and Watts, D.: Gulf Stream structure, transport, and recirculation near 68 ° W, *J. Geophys. Res.*, 100, 817–838, <https://doi.org/10.1029/94JC02497>, 1995.
- Jungclauss, J. H., Fischer, N., Haak, H., Lohmann, K., Marotzke, J., Matei, D., Mikolajewicz, U., Notz, D., and von Storch, J. S.: Characteristics of the ocean simulations in the Max Planck Institute Ocean Model (MPIOM), the ocean component of the MPI-Earth system model, *J. Adv. Model. Earth Syst.*, 5, 422–446, <https://doi.org/10.1002/jae.20023>, 2013.
- 5 Kanzow, T. and Zenk, W.: Structure and transport of the Iceland Scotland Overflow plume along the Reykjanes Ridge in the Iceland Basin, *Deep-Sea Res. Pt. I*, 86, 82–93, <https://doi.org/10.1016/j.dsr.2013.11.003>, 2014.
- Kanzow, T., Cunningham, S. A., Johns, W. E., Hirschi, J. J.-M., Marotzke, J., Baringer, M. O., Meinen, C. S., Chidichimo, M. P., Atkinson, C., Beal, L. M., Bryden, H. L., and Collins, J.: Seasonal variability of the Atlantic meridional overturning circulation at 26.5 ° N, *J. Climate*, 10 23, 5678–5698, <https://doi.org/10.1175/2010JCLI3389.1>, 2010.
- Katsman, C. A., Drijfhout, S. S., Dijkstra, H. A., and Spall, M. A.: Sinking of Dense North Atlantic Waters in a Global Ocean Model: Location and Controls, *J. Geophys Res. Oceans*, 123, 3563–3576, <https://doi.org/10.1029/2017JC013329>, 2018.
- Kawasaki, T. and Hasumi, H.: Effect of freshwater from the West Greenland Current on the winter deep convection in the Labrador Sea, *Ocean Modell.*, 75, 51–64, <https://doi.org/10.1016/j.ocemod.2014.01.003>, 2014.
- 15 Kjellsson, J., Holland, P. R., Marshall, G. J., Mathiot, P., Aksenov, Y., Coward, A. C., Bacon, S., Megann, A. P., and Ridley, J.: Model sensitivity of the Weddell and Ross seas, Antarctica, to vertical mixing and freshwater forcing, *Ocean Modelling*, 94, 141–152, <https://doi.org/10.1016/j.ocemod.2015.08.003>, 2015.
- Kurtakoti, P., Veneziani, M., Stössel, A., and Weijer, W.: Preconditioning and Formation of Maud Rise Polynyas in a High-Resolution Earth System Model, *J. Climate*, <https://doi.org/10.1175/JCLI-D-18-0392.1>, 2018.
- 20 Large, W. G., McWilliams, J. C., and Doney, S. C.: Oceanic vertical mixing: A review and a model with a nonlocal boundary layer parameterization, *Rev. Geophys.*, 21, 363–403, <https://doi.org/10.1029/94RG01872>, 1994.
- Lee, M.-M., Nurser, A. J. G., Stevens, I., and Salée, J.-B.: Subduction over the Southern Indian Ocean in a high-resolution atmosphere-ocean coupled model., *J. Clim.*, 24, 3830–3849, <https://doi.org/10.1175/2011JCLI3888.1>, 2011.
- Lherminier, P., Mercier, H., Gourcuff, C., Alvarez, M., Bacon, S., and Kermabon, C.: Transports across the 2002 Greenland-Portugal Ovide 25 section and comparison with 1997, *J. Geophys. Res.*, 112, C07 003, <https://doi.org/10.1029/2006JC003716>, 2007.
- Li, Q. and Lee, S.: A mechanism of mixed-layer formation in the Indo-western Pacific Southern Ocean: Preconditioning by an eddydriven jet-scale overturning circulation, *J. Phys. Oceanogr.*, 47, 2775–2772, <https://doi.org/10.1175/JPO-D-17-0006.1>, 2017.
- Liu, X., Chang, P., Kurian, J., Saravan, R., and Lin, X.: Satellite-Observed Precipitation Response to Ocean Mesoscale Eddies, *J. Climate*, 31, 6879–6895, <https://doi.org/10.1175/JCLI-D-17-0668.1>, 2018.
- 30 Lozier, M. S. et al.: Overturning in the Subpolar North Atlantic Program: A new international ocean observing system, *Bull. Am. Meteorol. Soc.*, 98, 43–63, <https://doi.org/10.1175/BAMS-D-16-0057.1>, 2017.
- Ma, X., Jing, Z., Chang, P., Liu, X., Montuoro, R., Small, J. R., Bryan, F. O., Greatbatch, R. J., Brandt, P., Wu, D., Lin, X., and Wu, L.: Western boundary currents regulated by the interaction between ocean eddies and the atmosphere, *Nature*, 535, 533–537, <https://doi.org/10.1038/nature18640>, 2016.
- 35 Marotzke, J. and Scott, J. R.: Convective Mixing and the Thermohaline Circulation, *J. Phys. Oceanogr.*, 29, 2962–2970, [https://doi.org/10.1175/1520-0485\(1999\)029<2962:CMATTC>2.0.CO;2](https://doi.org/10.1175/1520-0485(1999)029<2962:CMATTC>2.0.CO;2), 1999.
- Marshall, J. and Speer, K.: Closure of the meridional overturning circulation through Southern Ocean upwelling, *Nat. Geosci.*, 5 (3), 171–180, <https://doi.org/10.1038/ngeo1391>, 2012.

- Marshall, J., Scott, J. R., Romanou, A., Kelley, M., and Leboissetier, A.: The dependence of the ocean's MOC on mesoscale eddy diffusivities: A model study, *Ocean Model.*, 111, 1–8, 2017.
- Marsland, S. J., Haak, H., Jungclaus, J. H., Latif, M., and Röske, F.: The Max Planck Institute global ocean/sea ice model with orthogonal curvilinear coordinates, *Ocean Model.*, 5, 91–127, 2003.
- 5 Martin, R. and Moore, G. W. K.: Air-sea interaction associated with a Greenland reverse tip jet, *Geophys. Res. Lett.*, 34, L24802, <https://doi.org/10.1029/2007GL031093>, 2007.
- Mauritsen, T., Stevens, B., Roeckner, E., Crueger, T., Esch, M., Giorgetta, M., Haak, H., Jungclaus, J. H., Klocke, D., Matei, D., Mikolajewicz, U., Notz, D., Pincus, R., Schmidt, H., and Tomassini, L.: Tuning the climate of a global model, *J. Adv. Model. Earth Syst.*, 4(3), M00A01, <https://doi.org/10.1029/2012MS000154>, 2012.
- 10 Mauritsen, T. et al.: Developments in the MPI-M Earth System Model version 1.2 (MPI-ESM1.2) and its response to increasing CO<sub>2</sub>, *J. Adv. Model. Earth Syst.*, <https://doi.org/10.1029/2018MS001400>, 2018.
- McCarthy, G. D., Smeed, D. A., Johns, W. E., Frajka-Williams, E., Moat, B. I., Rayner, D., Baringer, M. O., Meinen, C. S., Collins, J., and Bryden, H. L.: Measuring the Atlantic Meridional Circulation at 26°N, *Prog. in Ocean.*, 130, 91–111, <https://doi.org/10.1016/j.pocean.2014.10.006>, 2015.
- 15 McClean, J. L., Bader, D. C., Bryan, F. O., Maltrud, M. E., Dennis, J. M., Mirin, A. A., Jones, P. W., Kim, Y. Y., Ivanova, D. P., Vertenstein, M., Boyle, J. S., Jacob, R. L., Norton, N., Craig, A., and Worley, P. H.: A prototype two-decade fully-coupled fine-resolution CCSM simulation, *Ocean Model.*, 39, 10–30, <https://doi.org/10.1016/j.ocemod.2011.02.011>, 2011.
- McDonagh, E. L., King, B. A., Bryden, H. L., Courtois, P., Szuts, Z., Baringer, M., Cunningham, S. A., Atkinson, C., and McCarthy, G.: Continuous estimate of Atlantic Oceanic freshwater flux at 26.5° N, *J. Climate*, 28, 8888–8906, [https://doi.org/10.1175/JCLI-D-14-](https://doi.org/10.1175/JCLI-D-14-00519.1)
- 20 00519.1, 2015.
- Meredith, M. P., Woodworth, P. L., Chereskin, T. K., Marshall, D. P., Allison, L. C., Bigg, G. R., Donohue, K., Heywood, K. J., Hughes, C. W., Hibbert, A., Hogg, A. M., Johnson, H. L., Loïc, J., King, B. A., Leach, H., Lenn, Y.-D., Morales Maqueda, M. A., Munday, D. R., Naveira Garabato, A. C., Provost, C., Sallée, J.-B., and Sprintall, J.: Sustained monitoring of the Southern Ocean at Drake Passage: Past achievements and future priorities, *Rev. Geophys.*, 49, RG4005, <https://doi.org/10.1029/2010RG000348>, 2011.
- 25 Milinski, S., Bader, J., Haak, H., Siogco, A. C., and Jungclaus, J. H.: High atmospheric horizontal resolution eliminates the wind-driven coastal warm bias in the southeastern tropical Atlantic, *Geophys. Res. Lett.*, 43, 10455–10462, <https://doi.org/10.1002/2016GL070530>, 2016GL070530, 2016.
- Müller, M., Haak, H., Jungclaus, J. H., Sündermann, J., and Thomas, M.: The effect of ocean tides on a climate model simulation, *Ocean Model.*, 35, 304–313, 2010.
- 30 Müller, W. A., Jungclaus, J. H., Mauritsen, T., Baehr, J., Bittner, M., Budich, R., Bunzel, F., Esch, M., Ghosh, R., Haak, H., Ilyina, T., Kleine, T., Kornbluh, L., Li, H., Modali, K., Notz, D., Pohlmann, H., Roeckner, E., Stemmler, I., Tian, F., and Marotzke, J.: A higher-resolution version of the Max Planck Institute Earth System Model (MPI-ESM 1.2-HR), *J. Adv. Model. Earth Syst.*, 10, 1383–1413, <https://doi.org/10.1029/2017MS001217>, 2018.
- Naughten, K., Meissner, K. J., Galton-Fenzi, B. K., England, M. H., Timmermann, R., Hellmer, H. H., Hattermann, T., and Debernard, J. B.: Intercomparison of Antarctic ice-shelf, ocean, and sea-ice interactions simulated by MetROMS-iceshelf and FESOM 1.4, *Geosci. Model. Dev.*, 11, 1257–1292, <https://doi.org/10.5194/gmd-11-1257-2018>, 2018.
- 35 Notz, D., Haumann, F. A., Haak, H., Jungclaus, J. H., and Marotzke, J.: Arctic sea-ice evolution as modeled by Max Planck Institute for Meteorology's Earth system model, *J. Adv. Model. Earth Syst.*, 5, 173–194, <https://doi.org/10.1002/jame.20016>, 2013.



- Nowlin Jr., W. D. and Klinck, J. M.: The physics of the Antarctic Circumpolar Current, *Rev. Geophys.*, 24(3), 469–491, <https://doi.org/10.1029/RG024i003p00469>, 1986.
- Pacanowski, R. C. and Philander, S. G. H.: Parameterization of Vertical Mixing in Numerical Models of Tropical Oceans, *J. Phys. Oceanogr.*, 11, 1443–1451, [https://doi.org/10.1175/1520-0485\(1981\)011<1443:POVMIN>2.0.CO;2](https://doi.org/10.1175/1520-0485(1981)011<1443:POVMIN>2.0.CO;2), 1981.
- 5 Pickart, R. S., Spall, M. A., Ribergaard, M. H., Moore, G. W. K., and Milliff, R. F.: Deep convection in the Irminger Sea forced by the Greenland tip jet, *Nature*, 424, 152–156, <https://doi.org/10.1038/nature01729>, 2003.
- Putrasahan, D., Kirtman, B. P., and Beal, L. M.: Modulation of SST Interannual Variability in the Agulhas Leakage Region Associated with ENSO, *J. Climate*, 29, 7089–7102, <https://doi.org/10.1175/JCLI-D-15-0172.1>, 2016.
- Putrasahan, D. A., Miller, A. J., and Seo, H.: Regional coupled ocean–atmosphere downscaling in the Southeast Pacific: impacts on upwelling, mesoscale air–sea fluxes, and ocean eddies, *Ocean Dyn.*, 63, 463–488, <https://doi.org/10.1007/s10236-013-0608-2>, 2013.
- 10 Putrasahan, D. A., Beal, L. M., Kirtman, B. P., and Cheng, Y.: A new Eulerian method to estimate “spicy” Agulhas leakage in climate models, *J. Climate*, 42, 4532–4539, <https://doi.org/10.1002/2015GL064482>, 2015.
- Putrasahan, D. A., Lohmann, K., von Storch, J. S., Jungclauss, J. H., Haak, H., and Gutjahr, O.: Surface flux drivers for the slowdown of the Atlantic Meridional Overturning Circulation in a high-resolution global coupled climate model, *J. Adv. Model. Earth Syst.*, accepted, 15 2018.
- Randall, D. A., Wood, R. A., Bony, S., Colman, R., Fichefet, T., Fyfe, J., Kattsov, V., Pitman, A., Shukla, J., Srinivasan, J., Stouffer, R. J., Sumi, A., and Taylor, K. E.: *Climate Change 2007: The Physical Science Basis. Contribution of Working Group I to the Fourth Assessment Report of the Intergovernmental Panel on Climate Change*, chap. *Climate Models and Their Evaluation*, Cambridge University Press, Cambridge, United Kingdom and New York, NY, USA, 2007.
- 20 Redi, M. H.: Oceanic Isopycnal Mixing by Coordinate Rotation, *Journal of Physical Oceanography*, 12, 1154–1158, [https://doi.org/10.1175/1520-0485\(1982\)012<1154:OIMBCR>2.0.CO;2](https://doi.org/10.1175/1520-0485(1982)012<1154:OIMBCR>2.0.CO;2), 1982.
- Reick, C., Raddatz, T., Brovkin, V., and Gayler, V.: Representatoin of natural and anthropogenic land cover changes in MPI-ESM, *J. Adv. Model. Earth Syst.*, 5, 459–482, <https://doi.org/10.1002/jame.20022>, 2013.
- Ridderinkhof, H., van der Werf, P. M., Ullgren, J. E., van Aken, H. M., van Leeuwen, P. J., and de Ruijter, P. M.: Seasonal and interannual variability in the Mozambique Channel from moored current observations, *J. Geophys. Res.*, 115, C06010, <https://doi.org/10.1029/2009JC005619>, 2010.
- 25 Rintoul, S. R. and Trull, T. W.: Seasonal evolution of the mixed layer in the Subantarctic zone south of Australia, *J. Geophys Res.*, 106(C12), 31 447–31 462, <https://doi.org/10.1029/2000JC000329>, 2001.
- Rosby, T. and Flagg, C.: Direct measurement of volume flux in the Faroe-Shetland Channel and over the Iceland-Faroe Ridge, *Geophys. Res. Lett.*, 39, L07 602, <https://doi.org/10.1029/2012GL051269>, 2012.
- 30 Sallée, J.-B., Shuckburgh, E., Bruneau, N., Meijers, A. J. S., Bracegirdle, T. J., and Wang, Z.: Assessment of Southern Ocean mixed-layer depths in CMIP5 models: Historical bias and forcing response, *J. Geophys. Res. Oceans*, 118, 1845–1862, <https://doi.org/10.1002/jgrc.20157>, 2013.
- Schweiger, A., Lindsay, R., Zhang, J., Steele, M., Stern, H., and Kwok, R.: Uncertainty in modelled Arctic sea ice volume, *J. Geophys. Res. Oceans*, 116, D06, <https://doi.org/10.1029/2011JC007084>, 2011.
- 35 Sein, D. V., Koldunov, N. V., Danilov, S., Sidorenko, D., Wekerle, C., Cabos, W., Rackow, T., Scholz, P., Semmler, T., Wang, Q., and Jung, T.: The relative influence of atmospheric and oceanic model resolution on the circulation of the North Atlantic Ocean in a coupled climate model, *J. Adv. Model. Earth Syst.*, 10, 2026–2041, <https://doi.org/10.1029/2018MS001327>, 2018.

- Small, R. J., Bacmeister, J., Bailey, D., Baker, A., Bishop, S., and Bryan, F.: A new synoptic scale resolving global climate simulation using the Community Earth System Model, *J. Adv. Model. Earth Syst.*, 6, 1065–1094, <https://doi.org/10.1002/2014MS000363>, 2014.
- Small, R. J., Curchitser, E., Hedstrom, K., Kauffmann, B., and Large, W. G.: The Benguela Upwelling System: Quantifying the Sensitivity to Resolution and Coastal Wind Representation in a Global Climate Model, *J. Climate*, 28, 9409–9432, <https://doi.org/10.1175/JCLI-D-15-0192.1>, 2015.
- Smeed, D., McCarthy, G., Rayner, D., Moat, B. I., Johns, W. E., Baringer, M. O., and Meinen, C. S.: Atlantic meridional overturning circulation observed by the RAPID-MOCHA-WBTS (RAPID-Meridional Overturning Circulation and Heatflux Array-Western Boundary Time Series) array at 26N from 2004 to 2017. British Oceanographic Data Centre - Natural Environment Research Council, UK, <https://doi.org/10.5285/5acfd143-1104-7b58-e053-6c86abc0d94b>, 2017.
- 10 Soto-Navarro, J., Criado-Aldeanueva, F., García-Lafuente, J., and Sánchez-Román, A.: Estimation of the Atlantic inflow through the Strait of Gibraltar from climatological and in situ data, *J. Geophys. Res.*, 115, C10023, <https://doi.org/10.1029/2010JC006302>, 2010.
- Srokosz, M. A. and Bryden, H. L.: Observing the Atlantic Meridional Overturning Circulation yields a decade of inevitable surprises, *Science*, 348(6241), 1255–1257, <https://doi.org/10.1126/science.1255575>, 2015.
- Stevens, B., Giorgetta, M., Esch, M., Mauritsen, T., Crueger, T., Rast, S., Salzmann, M., Schmidt, H., Bader, J., Block, K., Brokopf, R., Fast, I., Kinne, S., Kornbluh, L., Lohmann, U., Pincus, R., Reichler, T., and Roeckner, E.: Atmospheric component of the MPI-M Earth System Model: ECHAM6, *J. Adv. Model. Earth Syst.*, 5, 146–172, <https://doi.org/10.1002/jame.20015>, 2013.
- 15 Storkey, D., Blaker, A. T., Mathiot, P., Megann, A., Aksenov, Y., Blockley, E. W., et al.: UK Global Ocean GO6 and GO7: A traceable hierarchy of model resolutions, *Geosci. Model Dev*, 11, 3187–3213, <https://doi.org/10.5194/gmd.11-3187-2018>, 2018.
- Stössel, A., Notz, D., Haumann, F. A., Haak, H., Jungclaus, J., and Mikolajewicz, U.: Controlling high-latitude Southern Ocean convection in climate models, *Ocean Model.*, 86, 58–75, <https://doi.org/10.1016/j.ocemod.2014.11.008>, 2015.
- 20 Stössel, A., von Storch, J., Notz, D., Haak, H., and Gerdes, R.: High-frequency and meso-scale winter sea-ice variability in the Southern Oscillation in a high resolution global ocean model, *Ocean Dyn.*, <https://doi.org/10.1007/s10236-018-1135-y>, 2018.
- Timmermann, R. and Beckmann, A.: Parameterization of vertical mixing in the Weddell Sea, *Ocean Model.*, 6, 83–100, [https://doi.org/10.1016/S1463-5003\(02\)00061-6](https://doi.org/10.1016/S1463-5003(02)00061-6), 2004.
- 25 Toggweiler, J. R. and Samuels, B.: Effect of Drake Passage on the global thermohaline circulation, *Deep-Sea Res. I*, 42, 477–500, [https://doi.org/10.1016/0967-0637\(95\)00012-U](https://doi.org/10.1016/0967-0637(95)00012-U), 1995.
- Trenberth, K. E. and Caron, J. M.: Estimates of meridional atmosphere and ocean heat transports, *J. Climate*, 14, 3433–3443, [https://doi.org/10.1175/1520-0442\(2001\)014<3433:EOMAAO>2.0.CO;2](https://doi.org/10.1175/1520-0442(2001)014<3433:EOMAAO>2.0.CO;2), 2001.
- Våge, K., Pickart, R. S., Moore, G. W. K., and Ribergaard, M. H.: Winter Mixed Layer Development in the Central Irminger Sea: The Effect of Strong, Intermittent Wind Events, *J. Phys. Oceanogr.*, 38, 541–565, <https://doi.org/10.1175/2007JPO3678.1>, 2008.
- 30 Våge, K., Pickart, R., Sarafanov, A., Knutsen, Ø., Mercier, H., Lherminier, P., van Aken, H. M., Meincke, J., Quadfasel, D., and Bacon, S.: The Irminger Gyre: circulation, convection, and interannual variability, *Deep-Sea Res. I*, 58, 590–614, <https://doi.org/10.1016/j.dsr.2011.03001>, 2011.
- Valcke, S.: The OASIS3 coupler: a European climate modelling community software, *Geosci. Model. Dev.*, 6, 373–388, <https://doi.org/10.5194/gmd-6-373-2013>, 2013.
- 35 Vancoppenolle, M., Fichefet, T., and Goosse, H.: Simulating the mass balance and salinity of Arctic and Antarctic sea ice. 2: Importance of sea ice salinity variations, *Ocean. Modell.*, 27, 54–69, <https://doi.org/10.1016/j.ocemod.2008.11.003>, 2009.

- von Storch, J.-S., Eden, C., Fast, I., Haak, H., Hernández-Deckers, D., Maier-Reimer, E., Marotzke, J., and Stammer, D.: An Estimate of the Lorenz Energy Cycle for the World Ocean Based on the STORM/NCEP Simulation, *J. Phys. Oceanogr.*, 42, 2185–2205, <https://doi.org/10.1175/JPO-D-12-079.1>, 2012.
- von Storch, J. S., Haak, H., Hertwig, E., and Fast, I.: Vertical heat and salt fluxes due to resolved and parameterized meso-scale Eddies, *Ocean Model.*, 108, 1–19, <https://doi.org/10.1016/j.ocemod.2016.10.001>, 2016.
- 5 Wang, C., Zhang, L., Lee, S. K., Wu, L., and Mechoso, C. R.: A global perspective on CMIP5 climate model biases, *Nat. Clim. Change*, 4(3), 201–205, <https://doi.org/10.1038/nclimate2118>, 2014a.
- Wang, Q., Danilov, S., Sidorenko, D., Timmermann, R., Wekerle, C., Wang, X., Jung, T., and Schröter, J.: The Finite Element Sea Ice-Ocean Model FESOM v.1.4: formulation of an ocean general circulation model, *Geosci. Model. Dev.*, 7, 663–693, [https://doi.org/10.5194/gmd-](https://doi.org/10.5194/gmd-10)
- 10 7-663-2014, 2014b.
- Wang, Q., Wekerle, C., Danilov, S., Wang, X., and Jung, T.: A 4.5 km resolution Arctic Ocean simulation with the global multi-resolution model FESOM1.4, *Geosci. Model Dev.*, 11, 1229–1255, <https://doi.org/10.5194/gmd-11-1229-2018>, 2018.
- Wolff, J. O., Maier-Reimer, E., and Legutke, S.: The Hamburg Ocean Primitive Equation Model HOPE, Tech. Rep. 13, German Climate Computer Center (DKRZ), 1997.
- 15 Woodgate, R., Weingartner, T., and Lindsa, R.: Observed increases in Bering Strait oceanic fluxes from the Pacific to the Arctic from 2001 to 2011 and their impacts on the Arctic Ocean water column, *Geophys. Res. Lett.*, 39, L24 603, <https://doi.org/10.1029/2012GL054092>, 2012.
- Woodgate, R. A., Aagard, K., and Weingartner, T. J.: Interannual changes in the Bering Strait fluxes of volume, heat, and freshwater between 1991 and 2004, *Geophys. Res. Lett.*, 33, L15 609, <https://doi.org/10.1029/2006GL02693>, 2006.
- 20 Zhang, J. and Rothrock, D. A.: Modeling Global Sea Ice with a Thickness and Enthalpy Distribution Model in Generalized Curvilinear Coordinates, *Mon. Weather Rev.*, 131, 845–861, [https://doi.org/10.1175/1520-0493\(2003\)131<0845:MGSIWA>2.0.CO;2](https://doi.org/10.1175/1520-0493(2003)131<0845:MGSIWA>2.0.CO;2), 2003.
- Zhang, J. and Steele, M.: Effect of vertical mixing on the Atlantic Water layer circulation in the Arctic Ocean, *Geophys. Res. Oceans*, 112, C04S04, <https://doi.org/10.1029/2006JC003732>, 2007.

**Table 1.** Overview of MPI-ESM1.2 control simulations used within this study and their horizontal resolutions. The number of vertical levels are 95 in the atmosphere and 40 in the ocean, respectively. In brackets, the nominal horizontal resolution in a Gaussian grid (approximated at the equator) is given. All models use 30 years of spin-up and are analysed for the subsequent 50 years.

| Name | Atmosphere resolution   | Ocean resolution      | [.. <sup>192</sup> ] Ocean mixing scheme | Description                                        |
|------|-------------------------|-----------------------|------------------------------------------|----------------------------------------------------|
| HR   | T127 (0.93° or ~103 km) | TP04 (0.4° or ~44 km) | PP, KPP                                  | reference, ocean mixing sensitivity                |
| XR   | T255 (0.46° or ~51 km)  | TP04 (0.4° or ~44 km) | PP, KPP                                  | increased atmospheric resolution, ocean mixing sen |
| ER   | T127 (0.93° or ~103 km) | TP6M (0.1° or ~11 km) | PP                                       | increased ocean resolution                         |

**Table 2.** Maximum values of barotropic stream function (gyre strengths) in Sverdrup ( $Sv := 10^6 \text{ m}^3 \text{ s}^{-1}$ ) simulated by MPI-ESM1.2 and from observations.

| Region                               | HR <sub>pp</sub> | HR <sub>kpp</sub> | XR <sub>pp</sub> | XR <sub>kpp</sub> | ER <sub>pp</sub> | Obs.         | Reference                                                                                      |
|--------------------------------------|------------------|-------------------|------------------|-------------------|------------------|--------------|------------------------------------------------------------------------------------------------|
| Subpolar gyre<br>(North Atlantic)    | 34.6             | 40.6              | 31.0             | 32.1              | 36.6             | 26.0 to 40.0 | Clark (1984); Bersch (1995); Bacon (1997);<br>Lherminier et al. (2007); Holliday et al. (2009) |
| Subtropical gyre<br>(North Atlantic) | 48.2             | 64.9              | 44.0             | 63.9              | 62.8             | 46.0 to 61.0 | Johns et al. (1995)                                                                            |
| Subtropical gyre<br>(Pacific)        | 84.1             | 116.3             | 73.6             | 95.5              | 80.7             | 42.0±2.5     | Imawaki et al. (2001)                                                                          |

**Table 3.** Simulated (mean  $\pm$  one standard deviation) and observed net volume transports ( $S_v := 10^6 \text{ m}^3 \text{ s}^{-1}$ ) across sections.

| Section                | $HR_{pp}$       | $HR_{kpp}$      | $XR_{pp}$       | $XR_{kpp}$      | $ER_{pp}$       | Obs.              | Reference                    |
|------------------------|-----------------|-----------------|-----------------|-----------------|-----------------|-------------------|------------------------------|
| Bering Strait          | $0.7 \pm 0.1$   | $0.7 \pm 0.1$   | $0.5 \pm 0.1$   | $0.6 \pm 0.1$   | $0.9 \pm 0.1$   | 0.8 [0.7 to 1.1]  | Woodgate et al. (2006, 2012) |
| Fram Strait            | $2.5 \pm 0.6$   | $1.9 \pm 0.4$   | $2.5 \pm 0.6$   | $1.9 \pm 0.5$   | $1.0 \pm 0.4$   | $4.2 \pm 2.3$     | Fahrbach et al. (2006)       |
| Denmark Strait         | $3.9 \pm 0.6$   | $4.2 \pm 0.7$   | $4.1 \pm 0.6$   | $3.9 \pm 0.7$   | $4.6 \pm 0.4$   | 4.6               | Hansen et al. (2008)         |
|                        |                 |                 |                 |                 |                 | $3.4 \pm 1.4$     | Jochumsen et al. (2012)      |
|                        |                 |                 |                 |                 |                 | $3.2 \pm 0.5$     | Jochumsen et al. (2017)      |
| Iceland – Scotland     | $4.0 \pm 0.8$   | $5.0 \pm 1.0$   | $4.2 \pm 0.8$   | $4.4 \pm 1.0$   | $5.5 \pm 0.6$   | 4.8               | Hansen et al. (2008)         |
|                        |                 |                 |                 |                 |                 | $4.6 \pm 0.25$    | Rosby and Flagg (2012)       |
|                        |                 |                 |                 |                 |                 | $3.8 \pm 0.6$     | Kanzow and Zenk (2014)       |
| Florida Current        | $14.6 \pm 0.7$  | $15.5 \pm 0.7$  | $12.4 \pm 0.6$  | $14.1 \pm 0.6$  | $24.7 \pm 0.8$  | 31.7              | Kanzow et al. (2010)         |
|                        |                 |                 |                 |                 |                 | $31.6 \pm 2.7$    | McDonagh et al. (2015)       |
| Strait of Gibraltar    | $0.04 \pm 0.01$ | $0.04 \pm 0.01$ | $0.04 \pm 0.01$ | $0.04 \pm 0.01$ | $0.05 \pm 0.01$ | $0.038 \pm 0.007$ | Soto-Navarro et al. (2010)   |
|                        |                 |                 |                 |                 |                 | 0.041             | Bryden et al. (1994)         |
| Indonesian Throughflow | $8.5 \pm 0.8$   | $9.5 \pm 0.9$   | $8.0 \pm 0.5$   | $8.5 \pm 0.8$   | $13.0 \pm 0.8$  | 11.6 to 15.7      | Gordon et al. (2010)         |
| Mozambique Channel     | $8.8 \pm 1.7$   | $6.5 \pm 2.0$   | $8.0 \pm 1.3$   | $5.3 \pm 1.9$   | $13.6 \pm 1.2$  | 5.0 to 26.0       | DiMarco et al. (2002)        |
|                        |                 |                 |                 |                 |                 | $16.7 \pm 8.9$    | Ridderinkhof et al. (2010)   |
| Drake Passage          | $161.7 \pm 3.0$ | $191.9 \pm 2.6$ | $150.1 \pm 4.1$ | $170.2 \pm 3.0$ | $140.9 \pm 3.0$ | $134.0 \pm 14.0$  | Nowlin Jr. and Klinck (1986) |
|                        |                 |                 |                 |                 |                 | $137.0 \pm 8.0$   | Cunningham et al. (2003)     |
|                        |                 |                 |                 |                 |                 | $136.7 \pm 6.9$   | Meredith et al. (2011)       |
|                        |                 |                 |                 |                 |                 | $173.3 \pm 10.7$  | Donohue et al. (2016)        |

**Table 4.** Time-mean AMOC volume transports ( $\pm$  one standard deviation of annual means) at  $26^\circ\text{N}$  in 1000 m depth simulated by MPI-ESM1.2 and the depth of the North Atlantic Deep Water (NADW) cell at  $26.5^\circ\text{N}$  (defined where the stream function crosses zero). The observed annual mean ( $\pm$  on standard deviation) NADW cell depth from the RAPID-MOCHA-WBTS array (Smeed et al., 2017) is  $4379 \pm 279$  m. Further, the time-mean ( $\pm$  one standard deviation of annual means) heat and salt transports across  $50^\circ\text{N}$  are shown (positive means northward transport).

| Property                                                                   | $\text{HR}_{\text{pp}}$ | $\text{HR}_{\text{kpp}}$ | $\text{XR}_{\text{pp}}$ | $\text{XR}_{\text{kpp}}$ | $\text{ER}_{\text{pp}}$ |
|----------------------------------------------------------------------------|-------------------------|--------------------------|-------------------------|--------------------------|-------------------------|
| AMOC volume (Sv)                                                           | $14.9 \pm 3.5$          | $18.9 \pm 4.0$           | $11.0 \pm 3.8$          | $14.6 \pm 3.9$           | $14.9 \pm 3.6$          |
| NADW cell depth (m)                                                        | $2865 \pm 270$          | $3176 \pm 334$           | $2665 \pm 287$          | $2979 \pm 489$           | $2941 \pm 265$          |
| Atl. heat transport across $50^\circ\text{N}$ (PW)                         | $0.60 \pm 0.04$         | $0.63 \pm 0.06$          | $0.42 \pm 0.06$         | $0.52 \pm 0.05$          | $0.57 \pm 0.03$         |
| Atl. salt transport across $50^\circ\text{N}$ ( $10^6 \text{ kg s}^{-1}$ ) | $0.28 \pm 1.89$         | $0.64 \pm 2.18$          | $-1.04 \pm 2.54$        | $0.4 \pm 2.11$           | $-0.22 \pm 1.27$        |



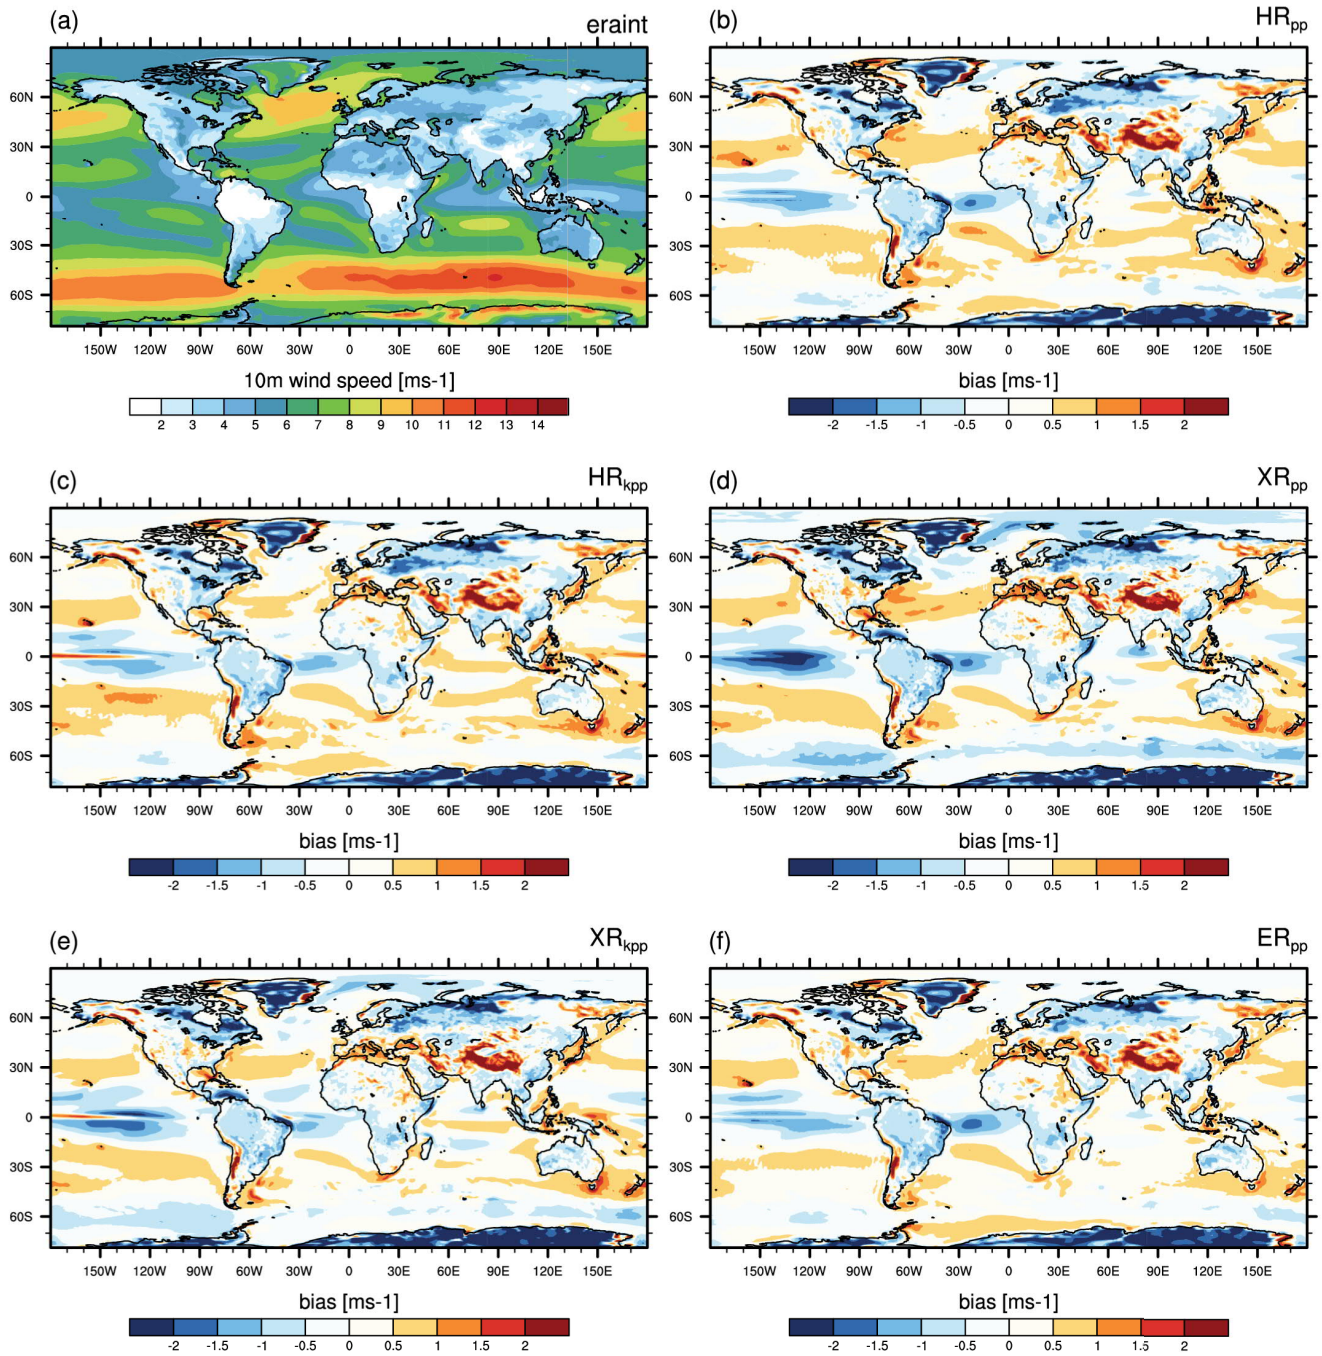

**Figure 1.** Annual mean 10 m wind speed from (a) ERA-Interim (1979–2005) and the bias of: (b) HR<sub>pp</sub>, (c) HR<sub>kpp</sub>, (d) XR<sub>pp</sub>, (e) XR<sub>kpp</sub>, and (f) ER<sub>pp</sub>.

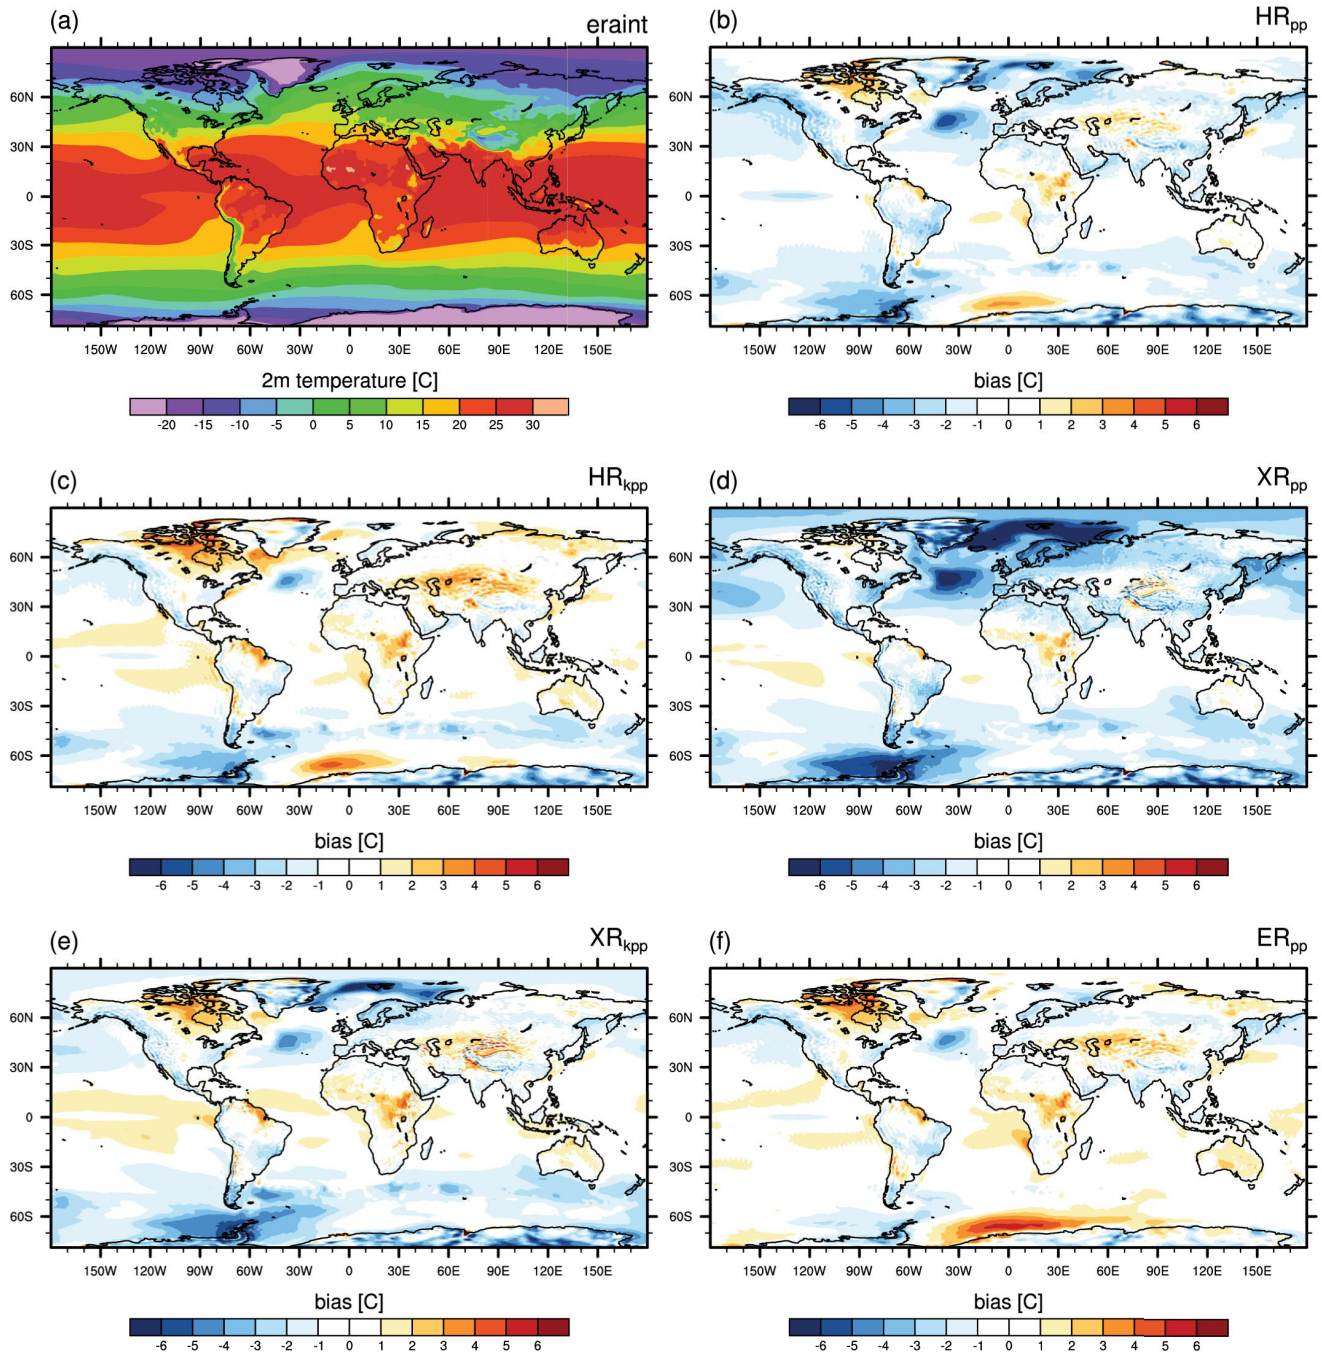

**Figure 2.** Annual mean 2 m temperature from (a) ERA-Interim (1979–2005) and the bias of: (b) HR<sub>pp</sub>, (c) HR<sub>kpp</sub>, (d) XR<sub>pp</sub>, (e) XR<sub>kpp</sub>, and (f) ER<sub>pp</sub>.



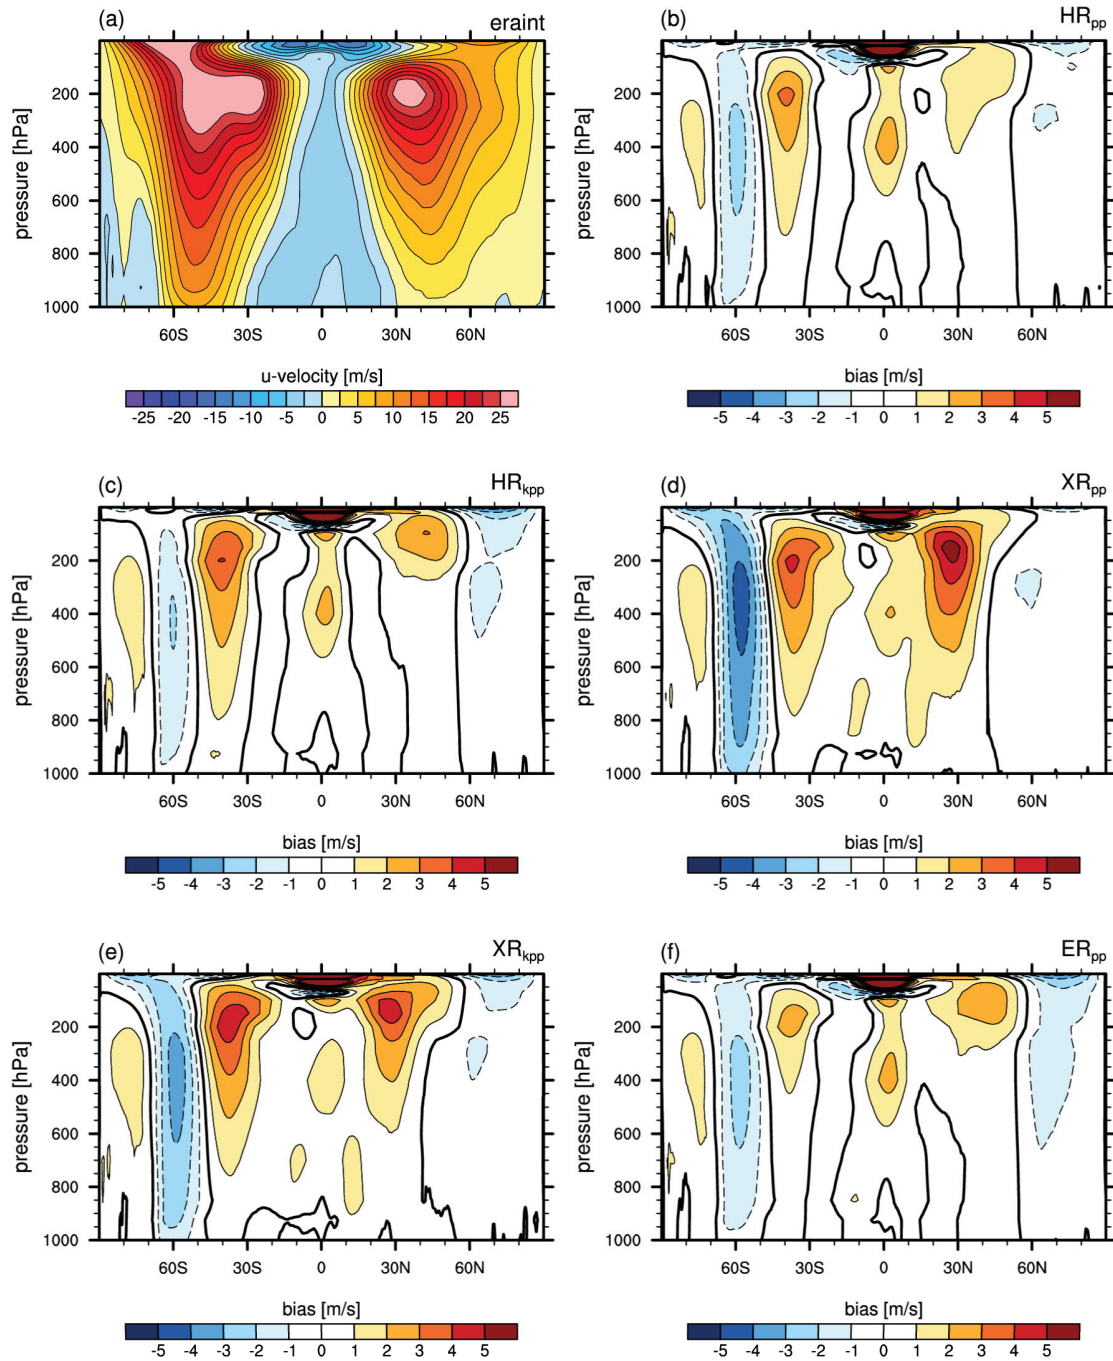

**Figure 3.** Global zonally-averaged u-velocity from (a) ERA-Interim (1979–2005) and the bias (MPI-ESM1.2 minus ERA-Interim) of: (b) HR<sub>pp</sub>, (c) HR<sub>kpp</sub>, (d) XR<sub>pp</sub>, (e) XR<sub>kpp</sub>, and (f) ER<sub>pp</sub>. The zero contour line is shown as a thick solid line; negative (positive) contours are dashed (solid).

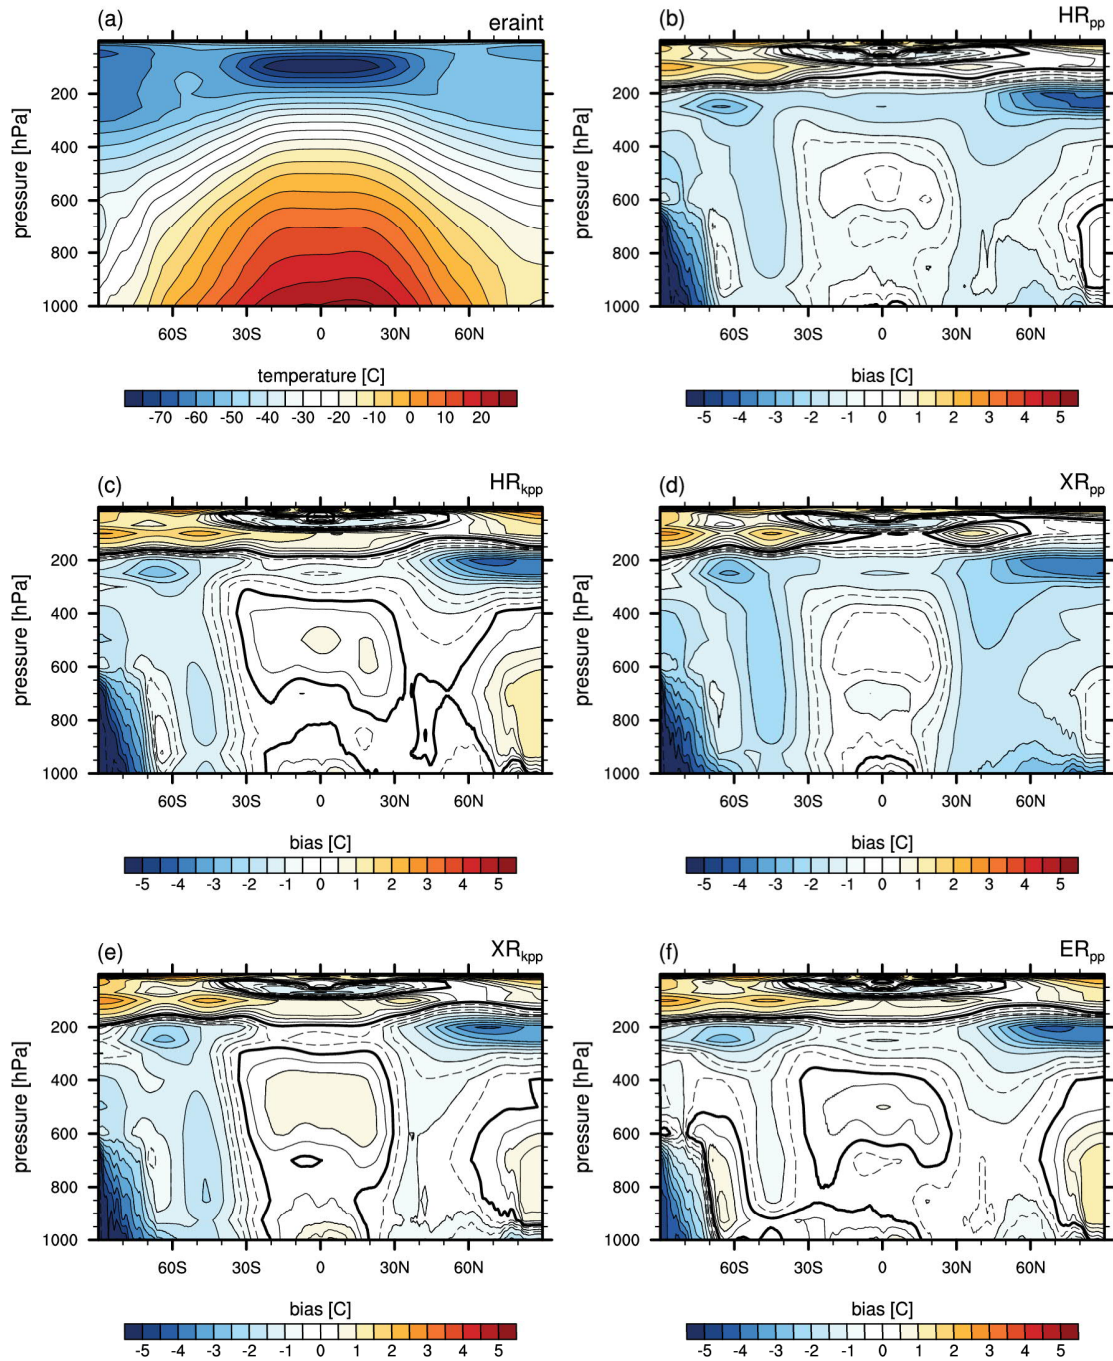

**Figure 4.** Global zonally-averaged temperature from (a) ERA-Interim (1979–2005) and the bias (MPI-ESM1.2 minus ERA-Interim) of (b) HR<sub>pp</sub>, (c) HR<sub>kpp</sub>, (d) XR<sub>pp</sub>, (e) XR<sub>kpp</sub>, and (f) ER<sub>pp</sub>. The contour lines in b-f span  $\pm 0.75$  with an interval of 0.5K, and of 1.0K outside that range. The zero contour line is shown as a thick solid line; negative (positive) contours are dashed (solid).

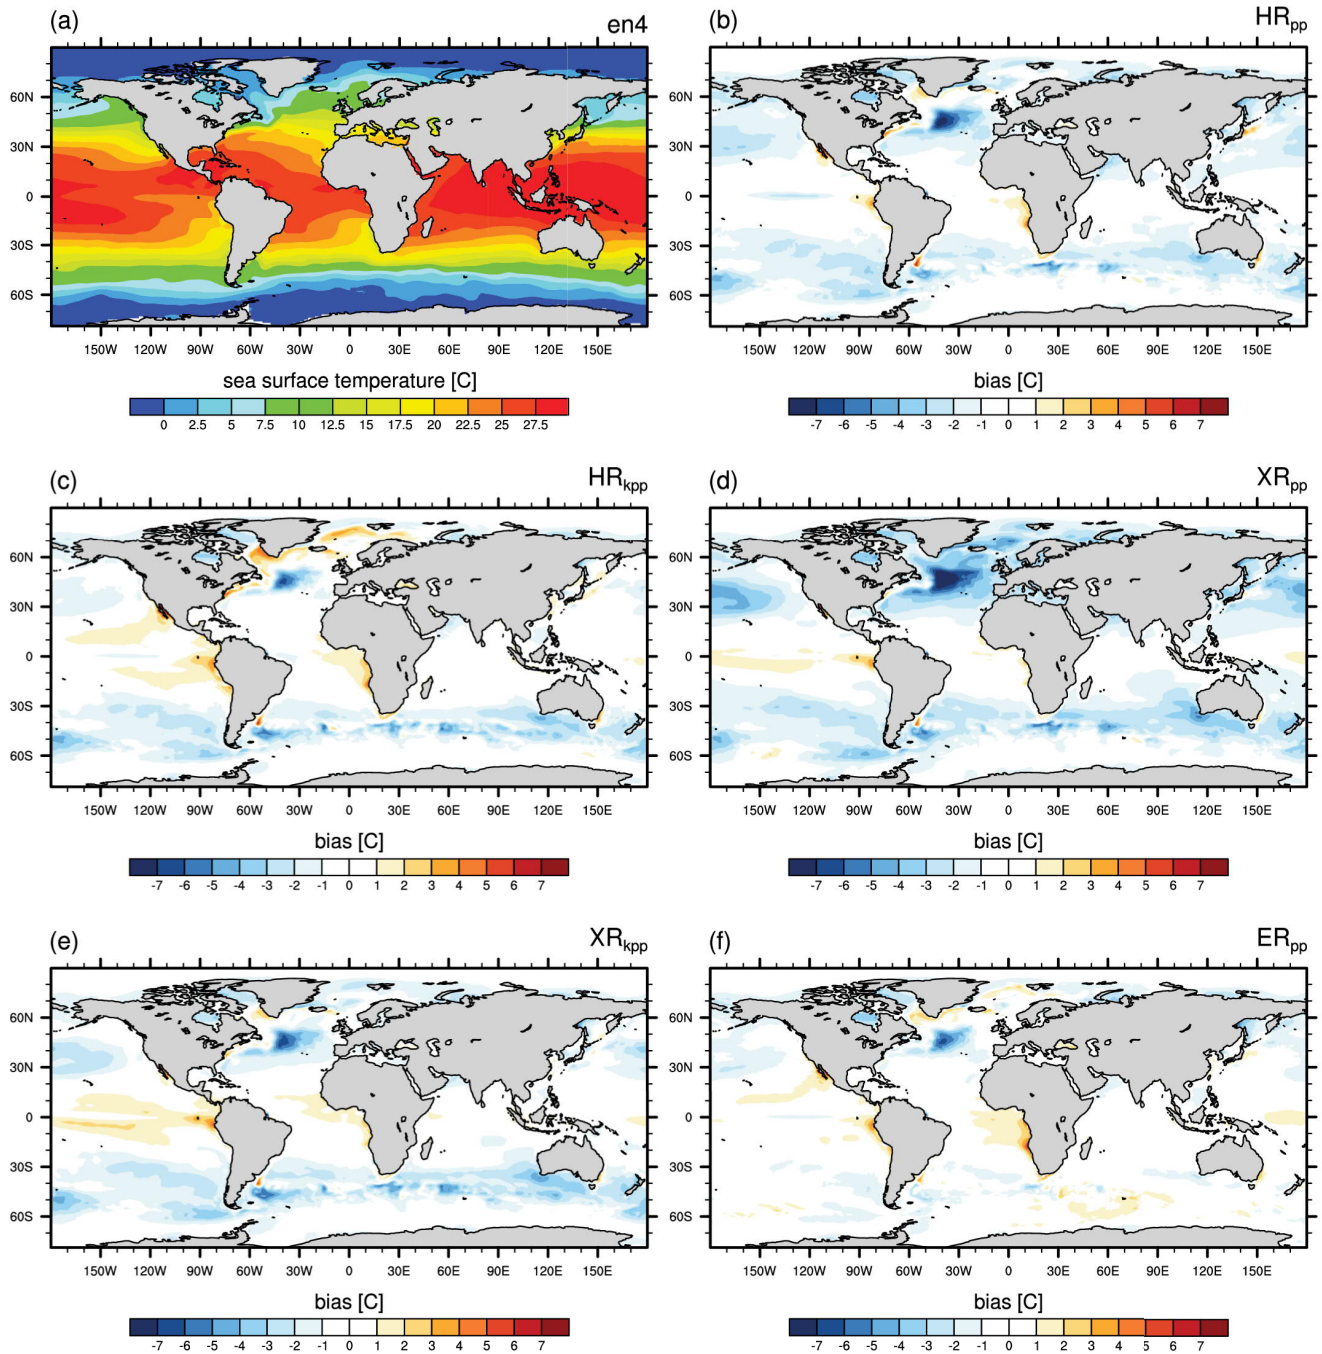

**Figure 5.** Sea surface temperature ( $^{\circ}\text{C}$ ) from (a) EN4 (averaged over 1945–1955) and differences: MPI-ESM1.2 minus EN4 for (b)  $\text{HR}_{\text{pp}}$ , (c)  $\text{HR}_{\text{kpp}}$ , (d)  $\text{XR}_{\text{pp}}$ , (e)  $\text{XR}_{\text{kpp}}$ , and (f)  $\text{ER}_{\text{pp}}$ .



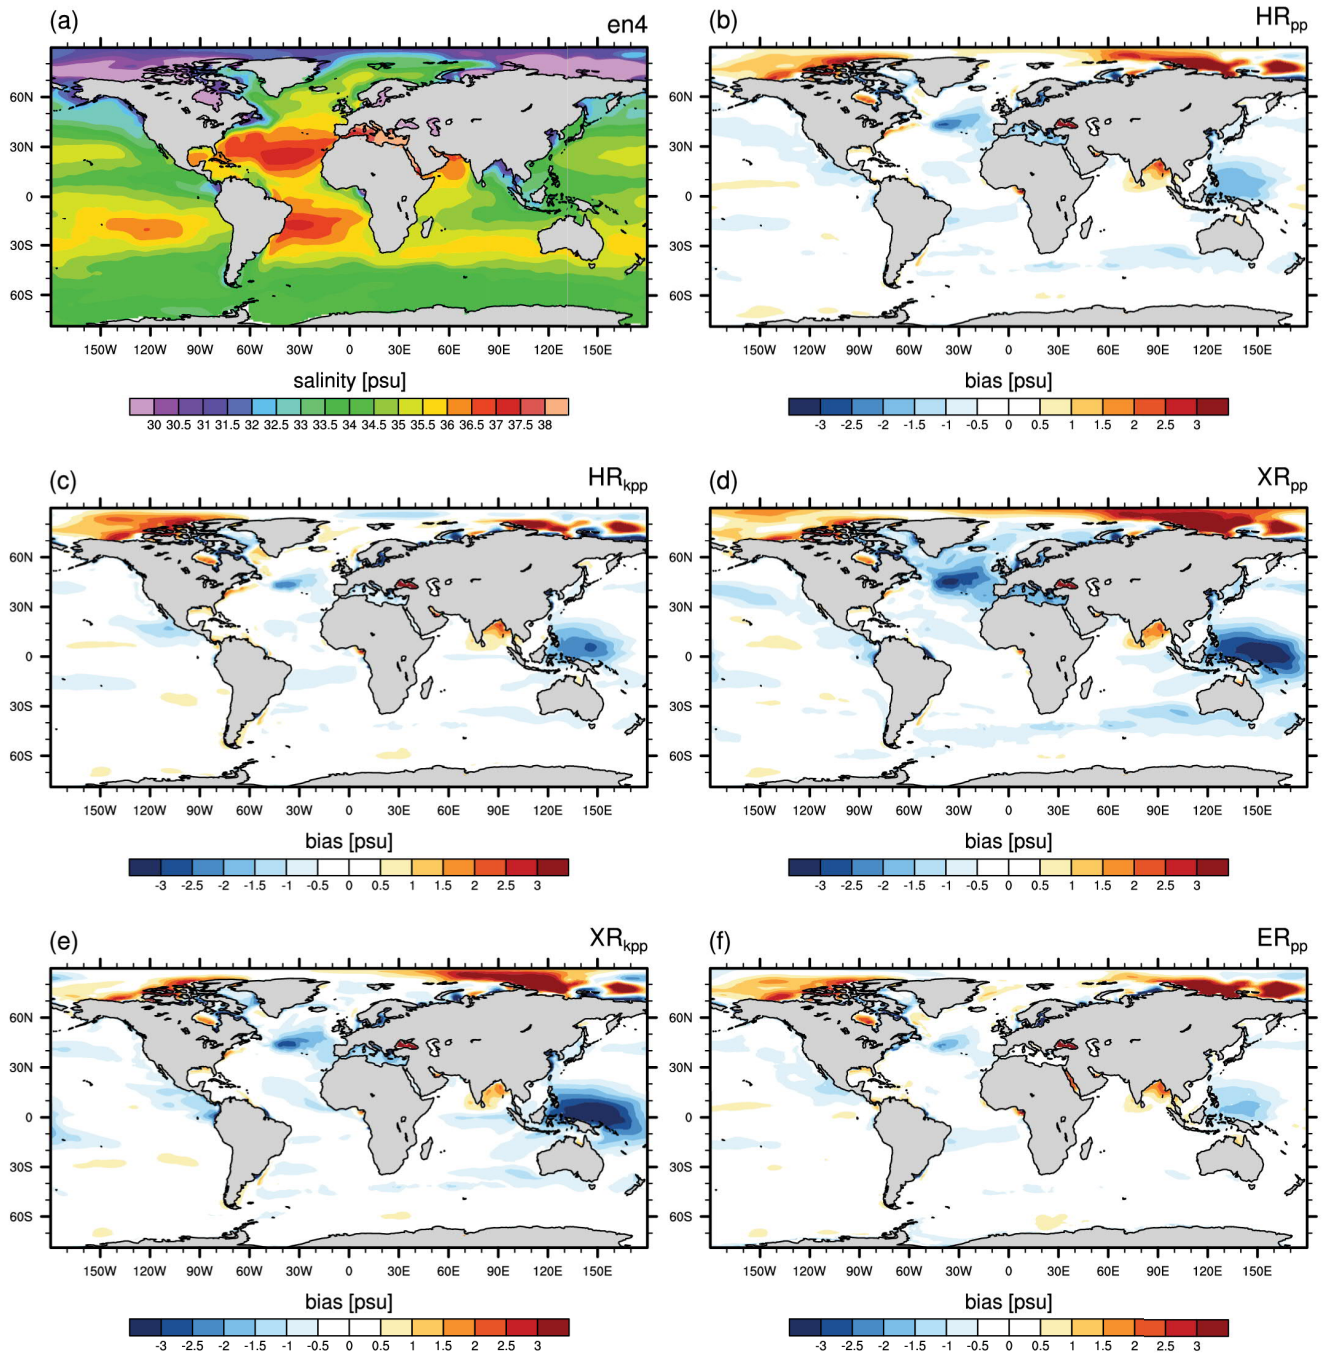

**Figure 6.** Sea surface salinity (psu) from (a) EN4 (averaged over 1945–1955) and for the differences: MPI-ESM1.2 minus EN4 for (b) HR<sub>pp</sub>, (c) HR<sub>kpp</sub>, (d) XR<sub>pp</sub>, [.,<sup>194</sup>] (e) XR<sub>kpp</sub>, and (f) ER<sub>pp</sub>.

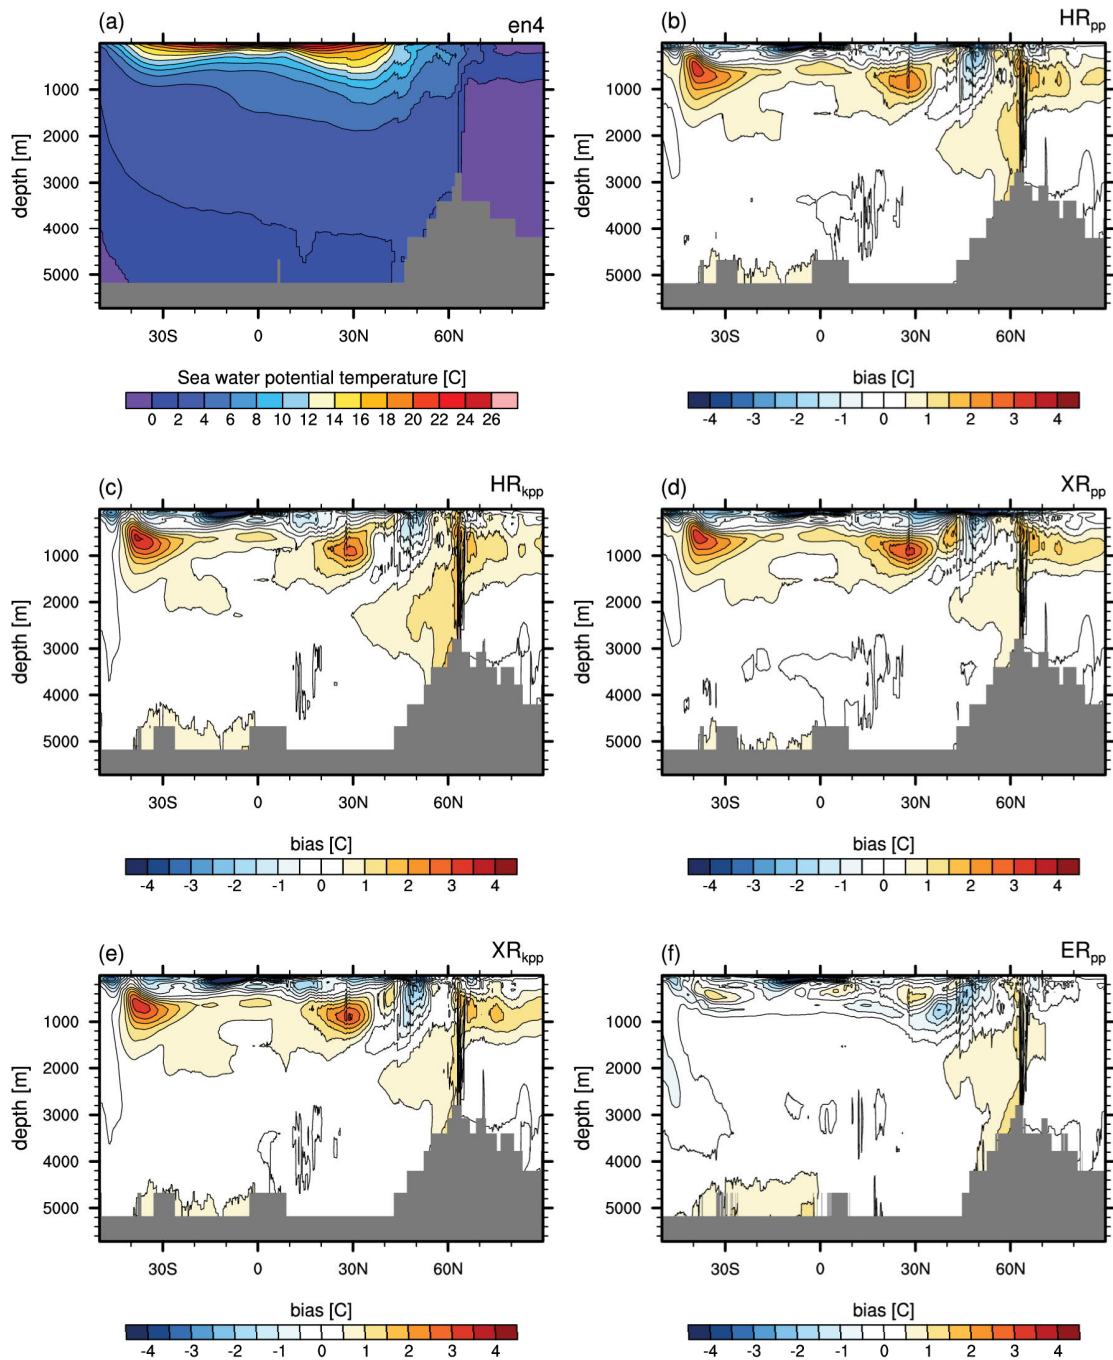

**Figure 7.** Zonal mean temperature transect through the Atlantic basin and the Arctic Ocean of (a) EN4 (averaged over 1945–1955) and the bias (MPI-ESM1.2 minus EN4) of (b) HR<sub>pp</sub>, (c) HR<sub>kpp</sub>, (d) XR<sub>pp</sub>, (e) XR<sub>kpp</sub>, and (f) ER<sub>pp</sub>. Contour levels (b-f) begin with  $\pm 0.5^\circ\text{C}$ .



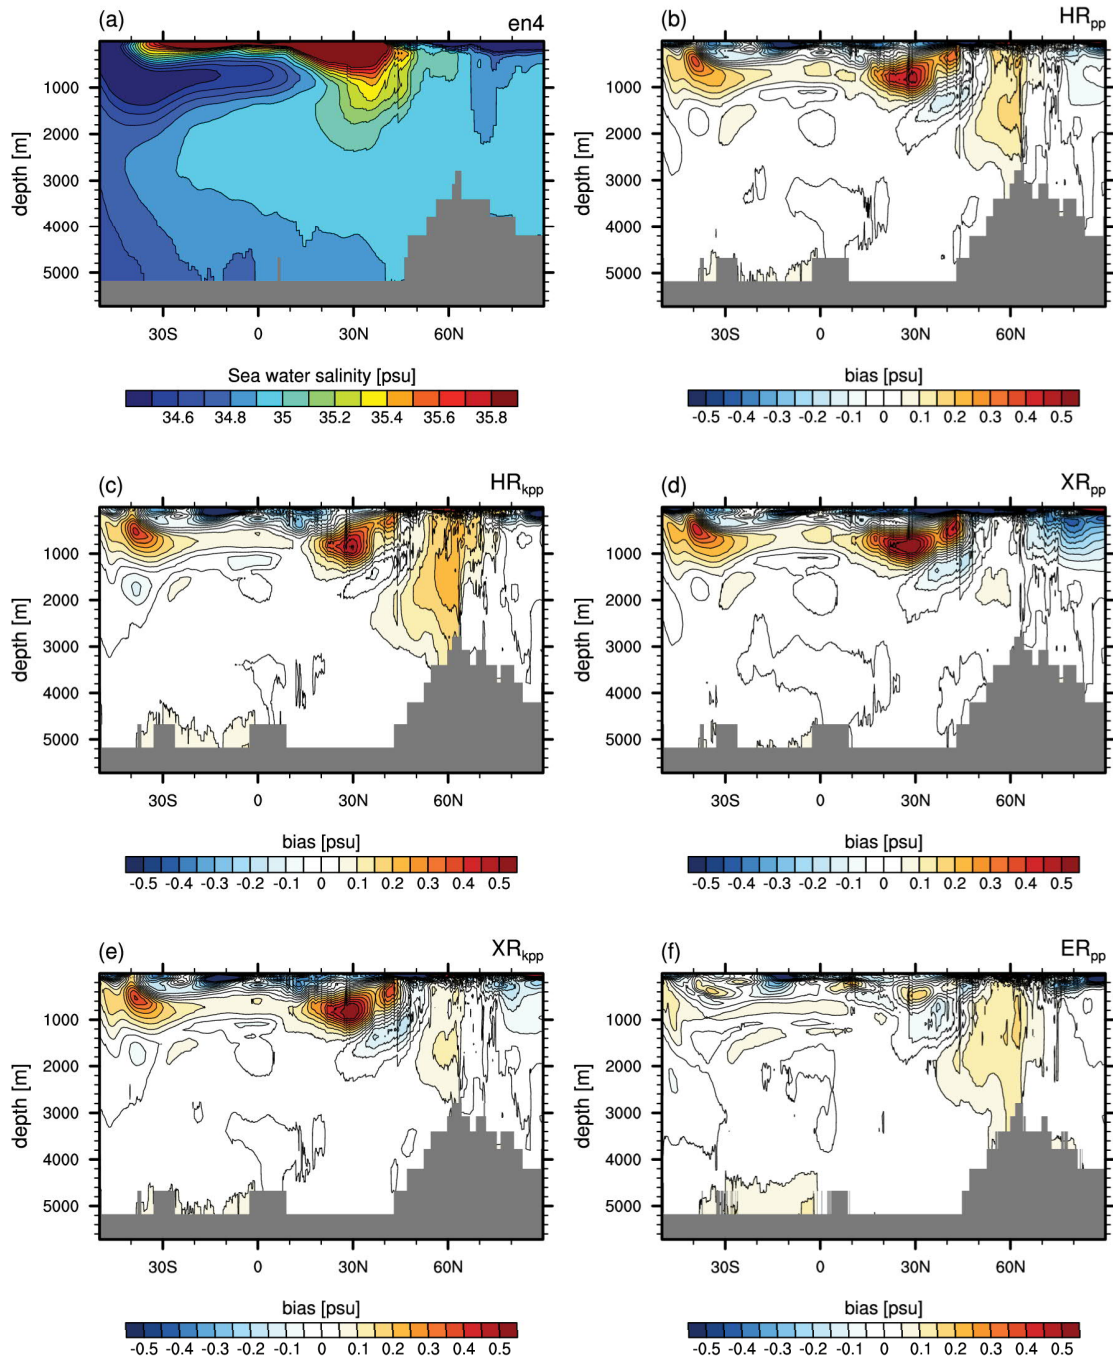

**Figure 8.** Zonal mean salinity transect through the Atlantic basin and the Arctic Ocean of (a) EN4 (averaged over 1945–1955) and the bias (MPI-ESM1.2 minus EN4) (b) HR<sub>kpp</sub>, (c) XR<sub>pp</sub>, and (d) XR<sub>kpp</sub>, (e) XR<sub>kpp</sub>, and (f) ER<sub>pp</sub>. Contour levels (b-f) begin with  $\pm 0.05$  psu.

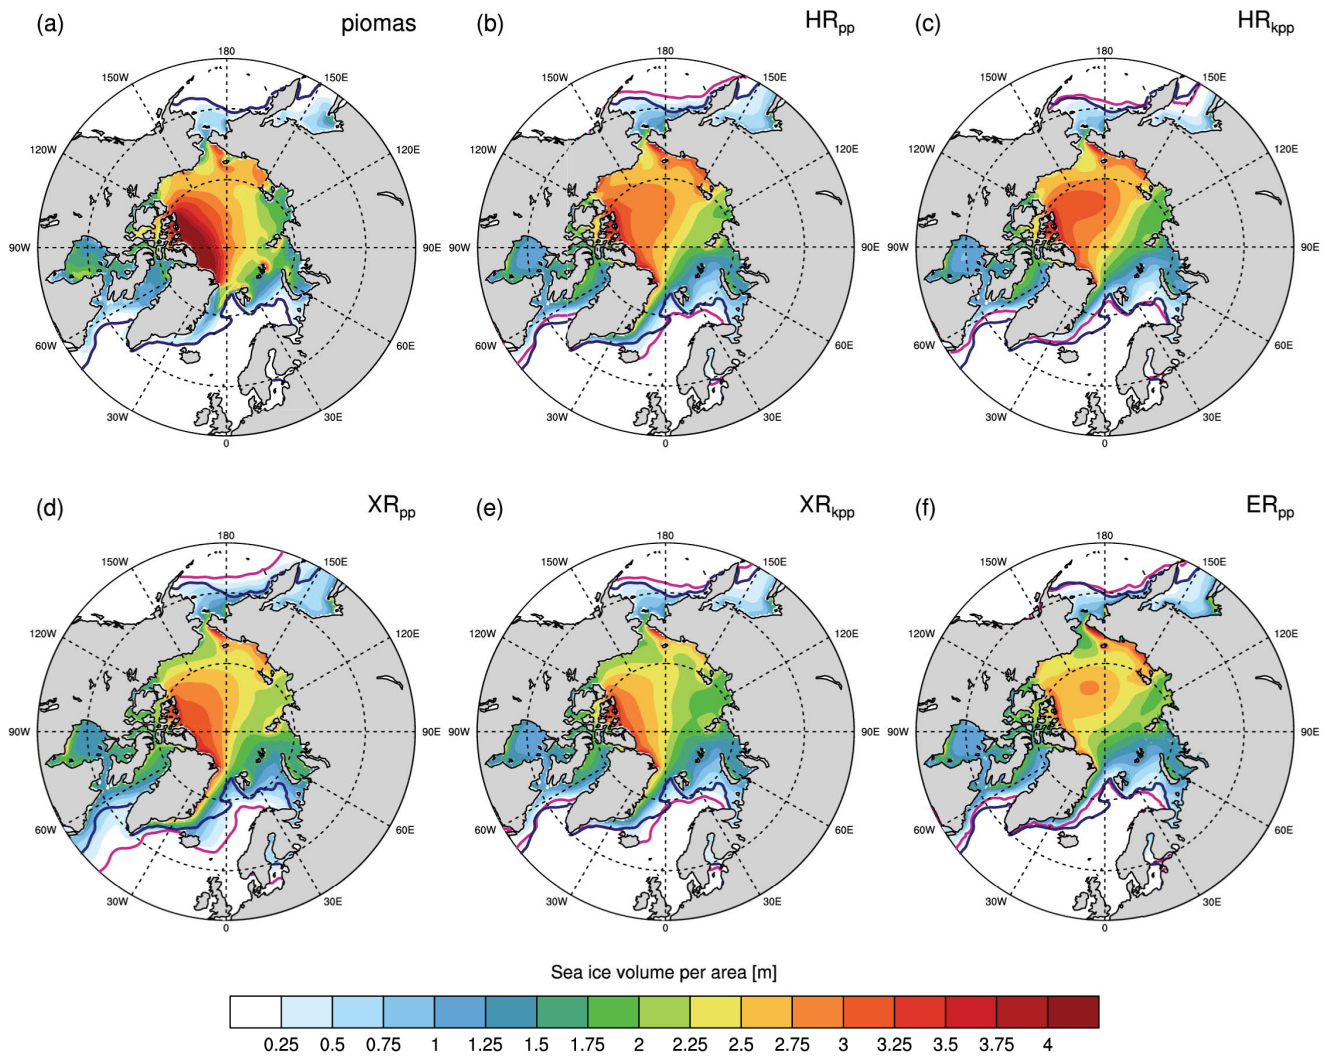

**Figure 9.** Time-averaged Arctic sea ice volume in March for (a) PIOMAS reanalysis (Zhang and Rothrock, 2003), (b) HR<sub>pp</sub>, ([..<sup>195</sup> ]c) HR<sub>kpp</sub>, ([..<sup>196</sup> ]d) XR<sub>pp</sub>, ([..<sup>197</sup> ]e) XR<sub>kpp</sub>, and ([..<sup>198</sup> ]f) ER<sub>pp</sub>. The 15% sea ice concentration contour is shown in magenta for the MPI-ESM1.2 simulations and in dark blue for the EUMETSAT OSI SAF observation (averaged March 1979–2005).

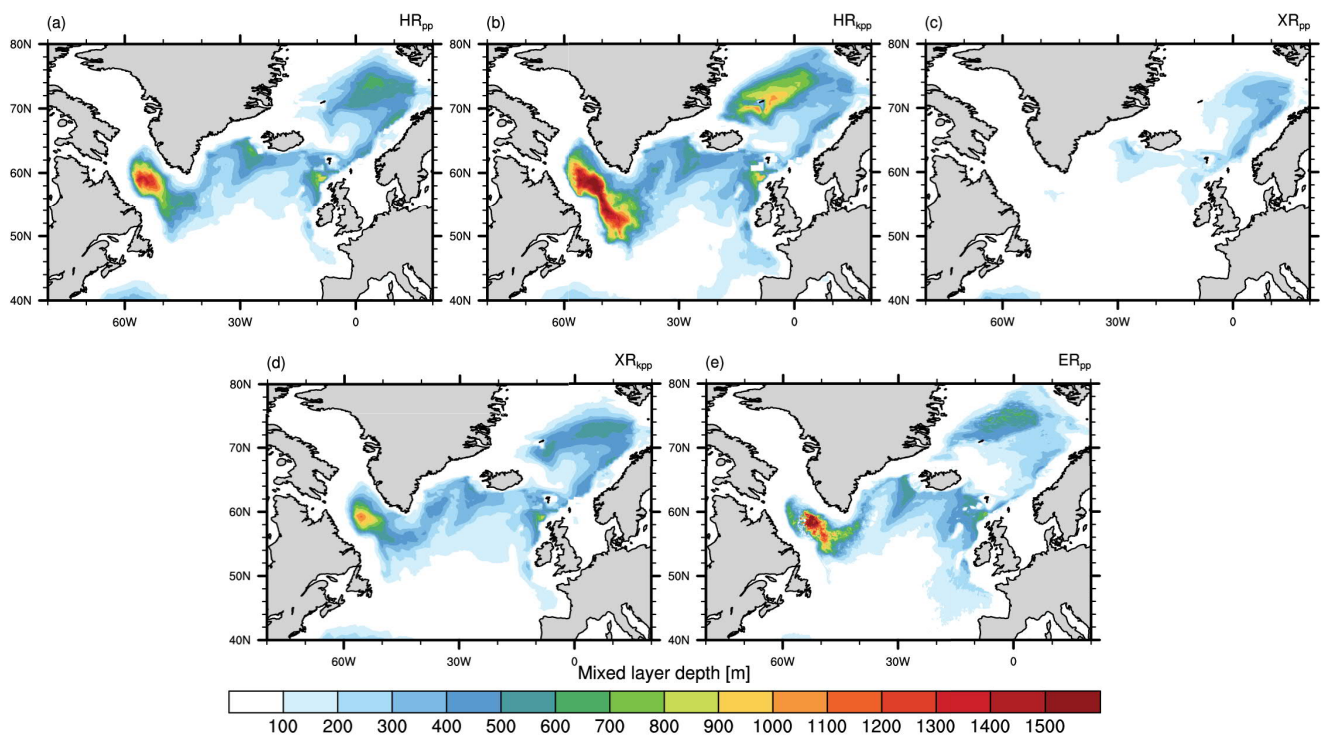

**Figure 10.** Time-averaged mixed layer depth ( $\sigma_t = 0.01 \text{ kg m}^{-3}$ ) in March in the North Atlantic and the Nordic Seas for (a) HR<sub>pp</sub>, (b) HR<sub>kpp</sub>, (c) XR<sub>pp</sub>, (d) XR<sub>kpp</sub>, and (e) ER<sub>pp</sub>.

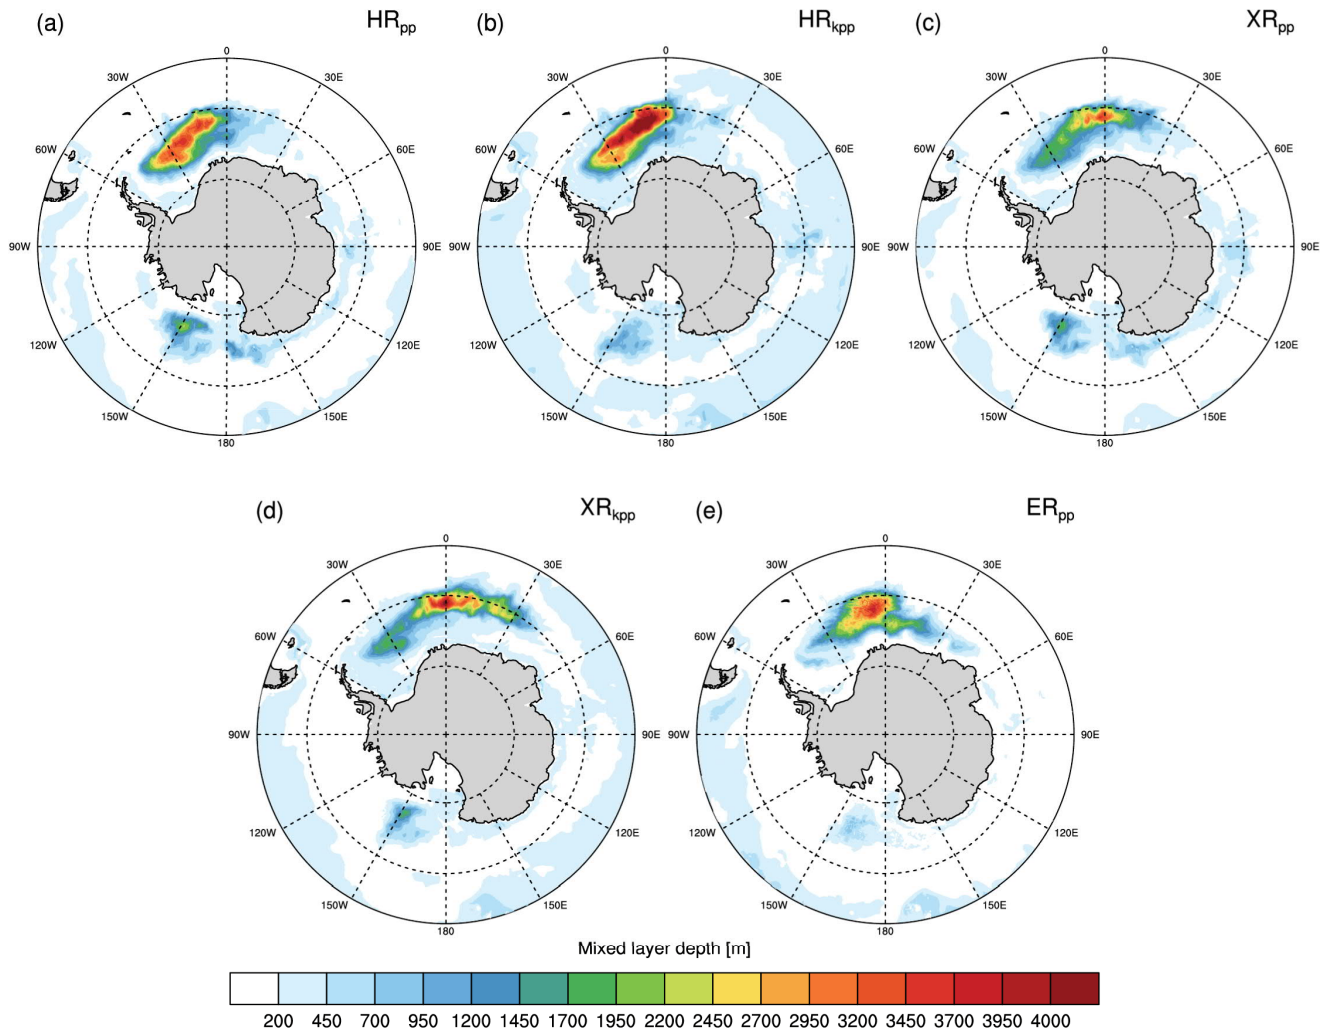

**Figure 11.** Time-averaged mixed layer depth ( $\sigma_t = 0.03 \text{ kg m}^{-3}$ ) in September in the Southern Ocean for (a) HR<sub>pp</sub>, (b) HR<sub>kpp</sub>, (c) XR<sub>pp</sub>, (d) XR<sub>kpp</sub>, and (e) ER<sub>pp</sub>.



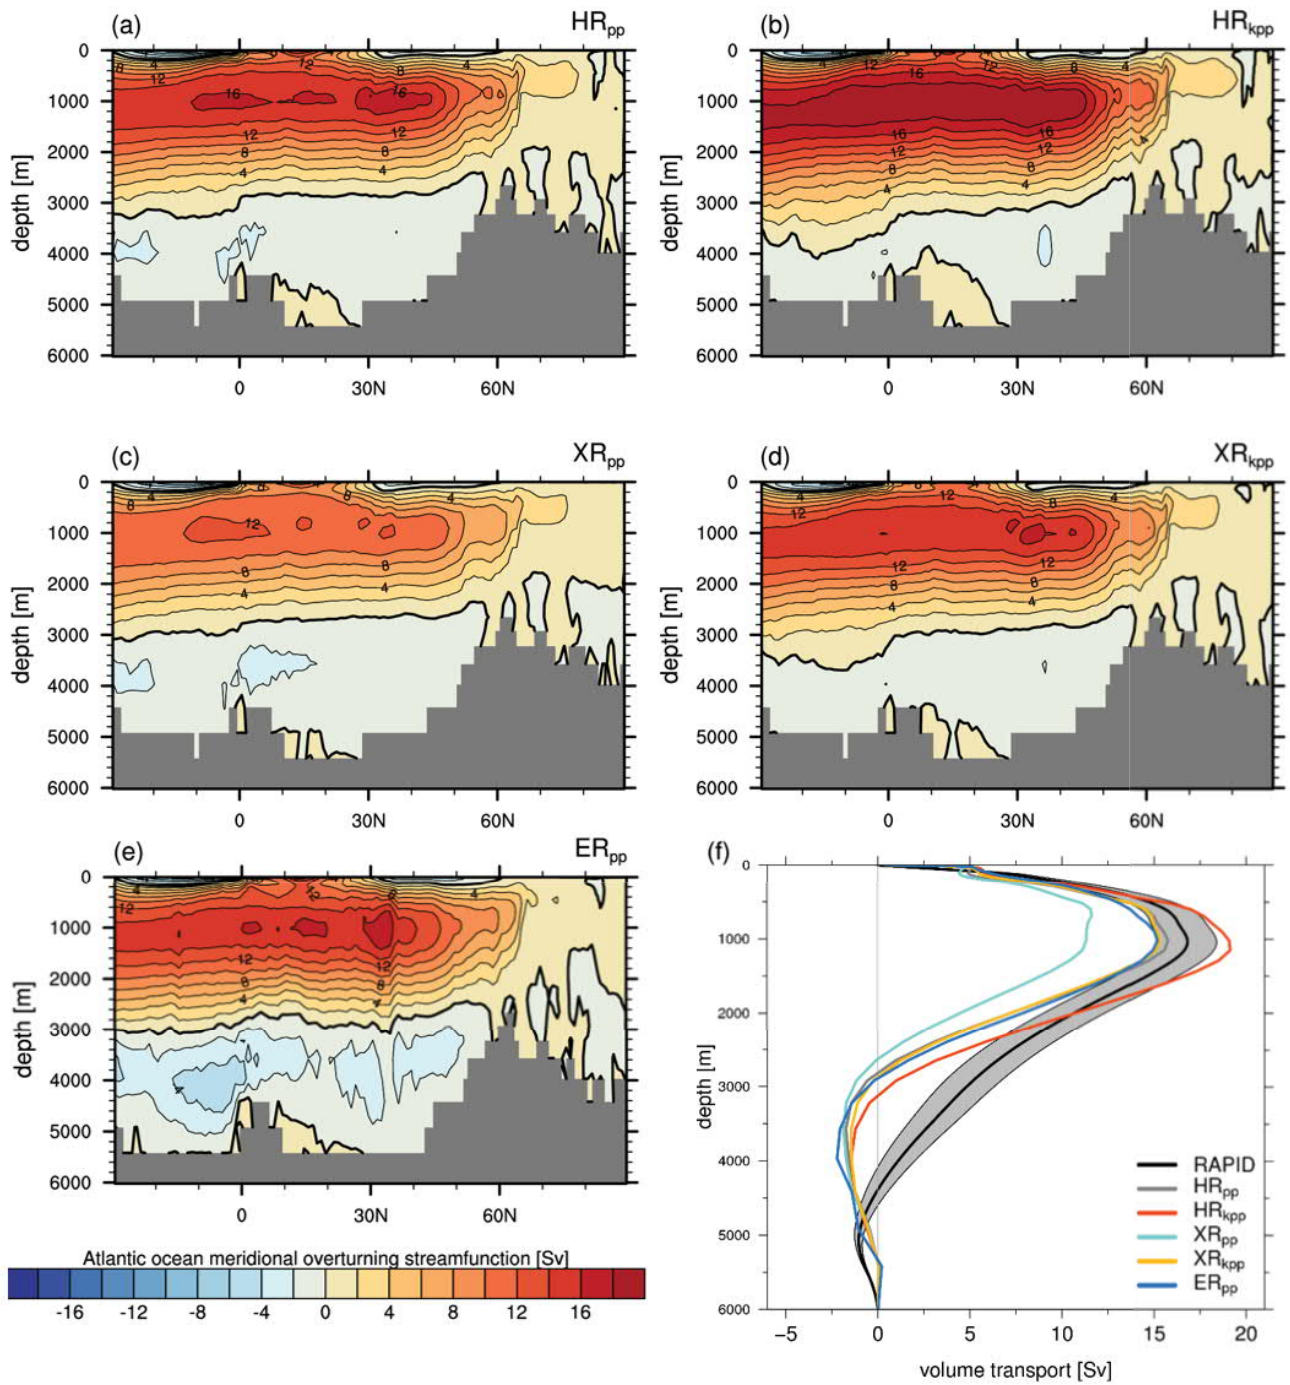

**Figure 12.** Eulerian stream function ( $\text{Sv} := 10^6 \text{ m}^3 \text{ s}^{-1}$ ) of the Atlantic Meridional Overturning Circulation (AMOC) for (a)  $\text{HR}_{\text{pp}}$ , (b)  $\text{HR}_{\text{kpp}}$ , (c)  $\text{XR}_{\text{pp}}$ , (d)  $\text{XR}_{\text{kpp}}$ , and (e)  $\text{ER}_{\text{pp}}$ . The zero contour is drawn as a thicker line. In (f) annual mean profiles of the AMOC at  $26.5^\circ \text{ N}$  are shown as observed from Apr 2004 to Feb 2017 by the RAPID-MOCHA-WBTS array ( $\pm$  one standard deviation marked by grey shading) (Smeed et al., 2017) and simulated by MPI-ESM1.2.

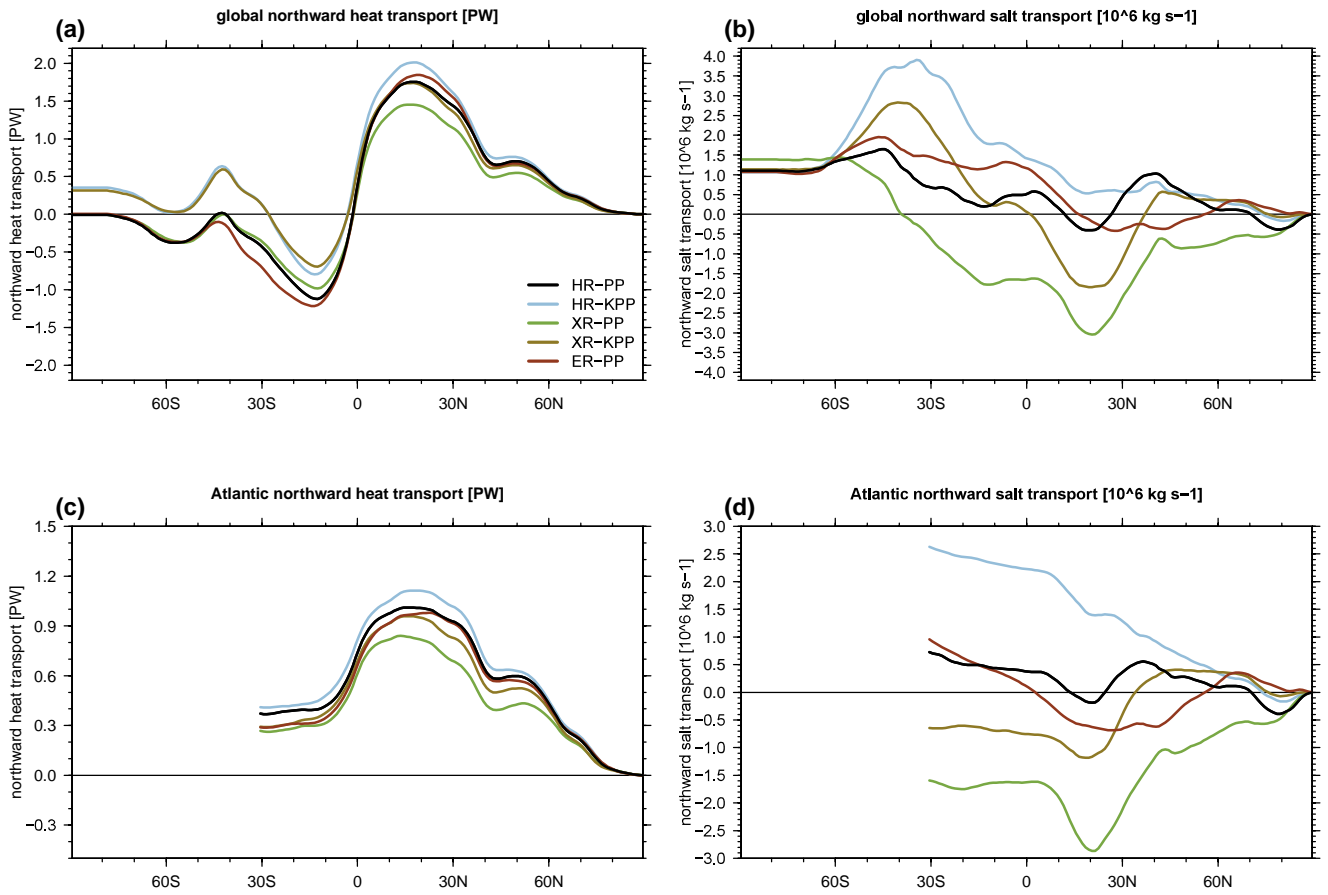

**Figure A1.** [..<sup>199</sup>] Time-averaged northward heat ([..<sup>200</sup>]PW) [..<sup>201</sup>] and salt transport ( $10^6 \text{ kg s}^{-1}$ ) in the [..<sup>202</sup>]global ocean (a[..<sup>203</sup>],[..<sup>204</sup>] b) [..<sup>205</sup>] and in the Atlantic basin (c[..<sup>206</sup>],[..<sup>207</sup>] d)[..<sup>208</sup>]. Note the different scaling in (c) and ([..<sup>209</sup>]d)[..<sup>210</sup>].

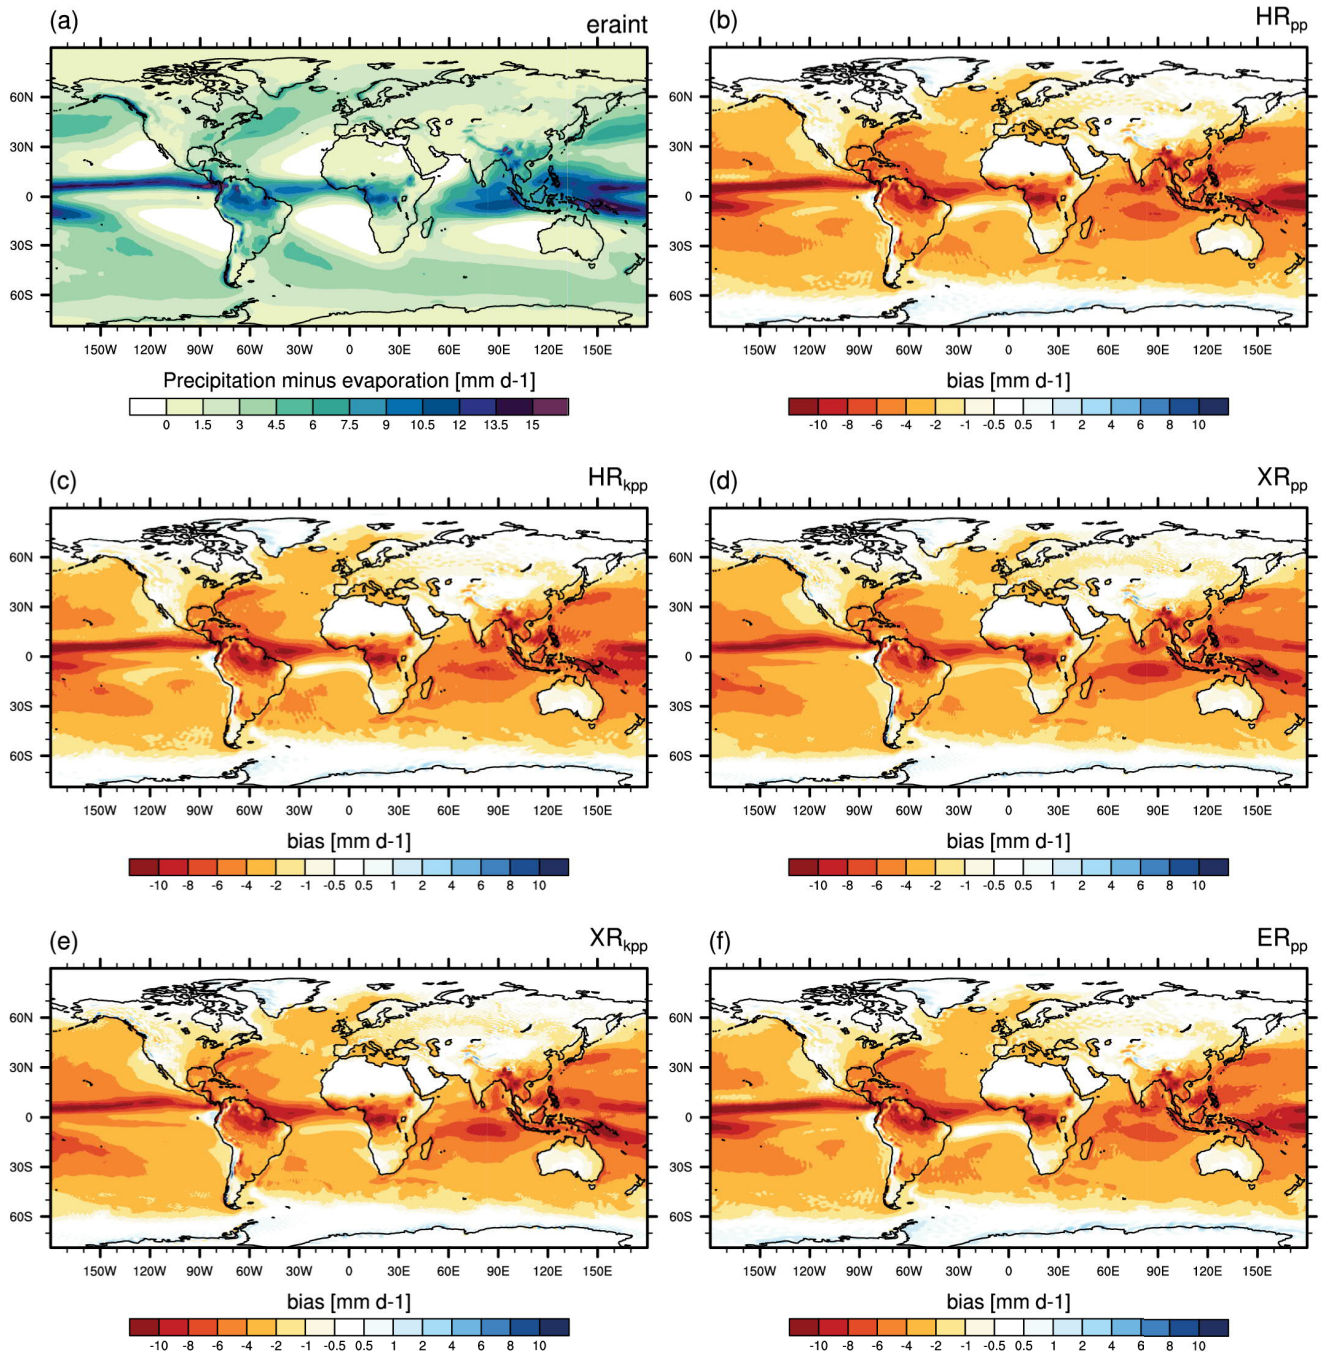

Figure A2. [..<sup>211</sup>] Time-averaged precipitation minus evaporation from ([..<sup>212</sup>] a) [..<sup>213</sup>] ERA-Interim (1979–2005) and the [..<sup>214</sup>] bias of: ([..<sup>215</sup>] b) HR<sub>pp</sub>, ([..<sup>216</sup>] c) HR<sub>kpp</sub>, ([..<sup>217</sup>] d) XR<sub>pp</sub>, ([..<sup>218</sup>] e) XR<sub>kpp</sub>, and ([..<sup>219</sup>] f) ER<sub>pp</sub>. [..<sup>220</sup>]



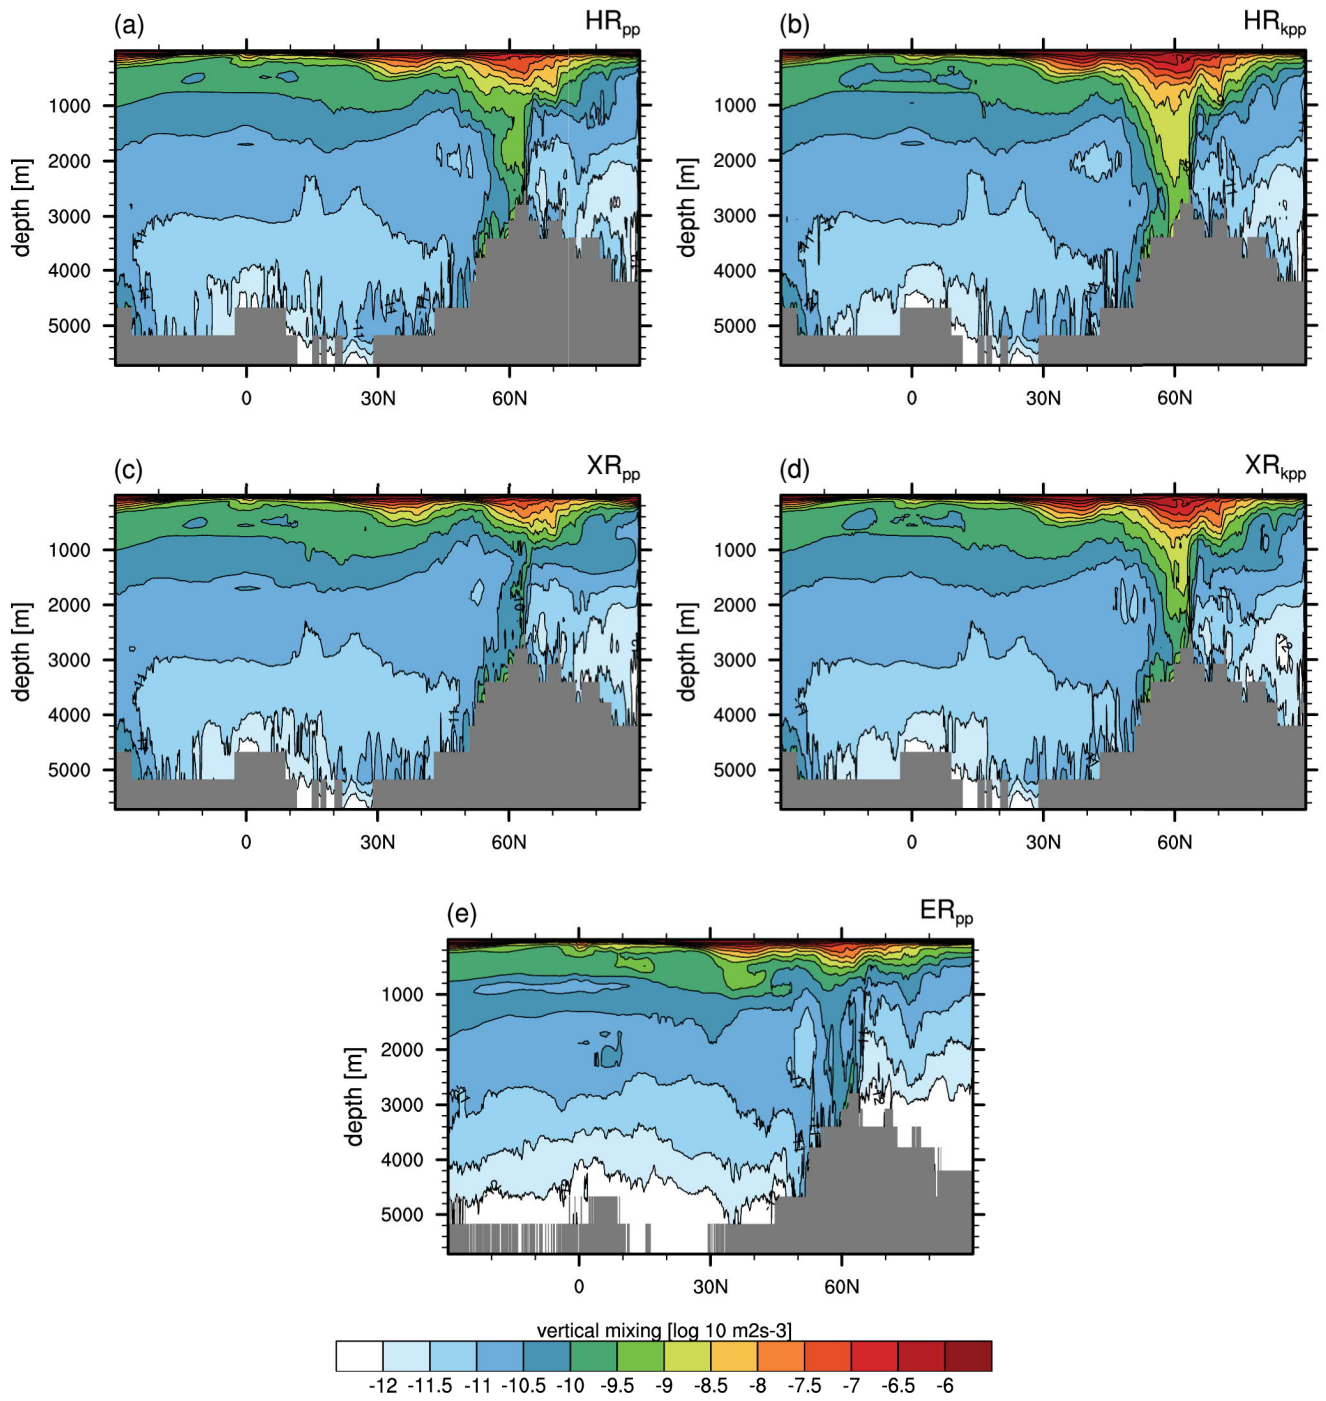

**Figure A3.** [[..221](#)] [Transect of zonal mean vertical mixing](#) ([\[..222\]](#)  $\log_{10}(k_v N^2)$ ) [[..223](#)] [through the](#) [[..224](#)] [Atlantic basin and the Arctic Ocean](#) of (a) [[..225](#)]  $HR_{pp}$ , (b) [[..226](#)]  $HR_{kpp}$ , (c) [[..227](#)]  $XR_{pp}$ , (d) [[..228](#)]  $XR_{kpp}$ , and (e) [[..229](#)]  $ER_{pp}$ .

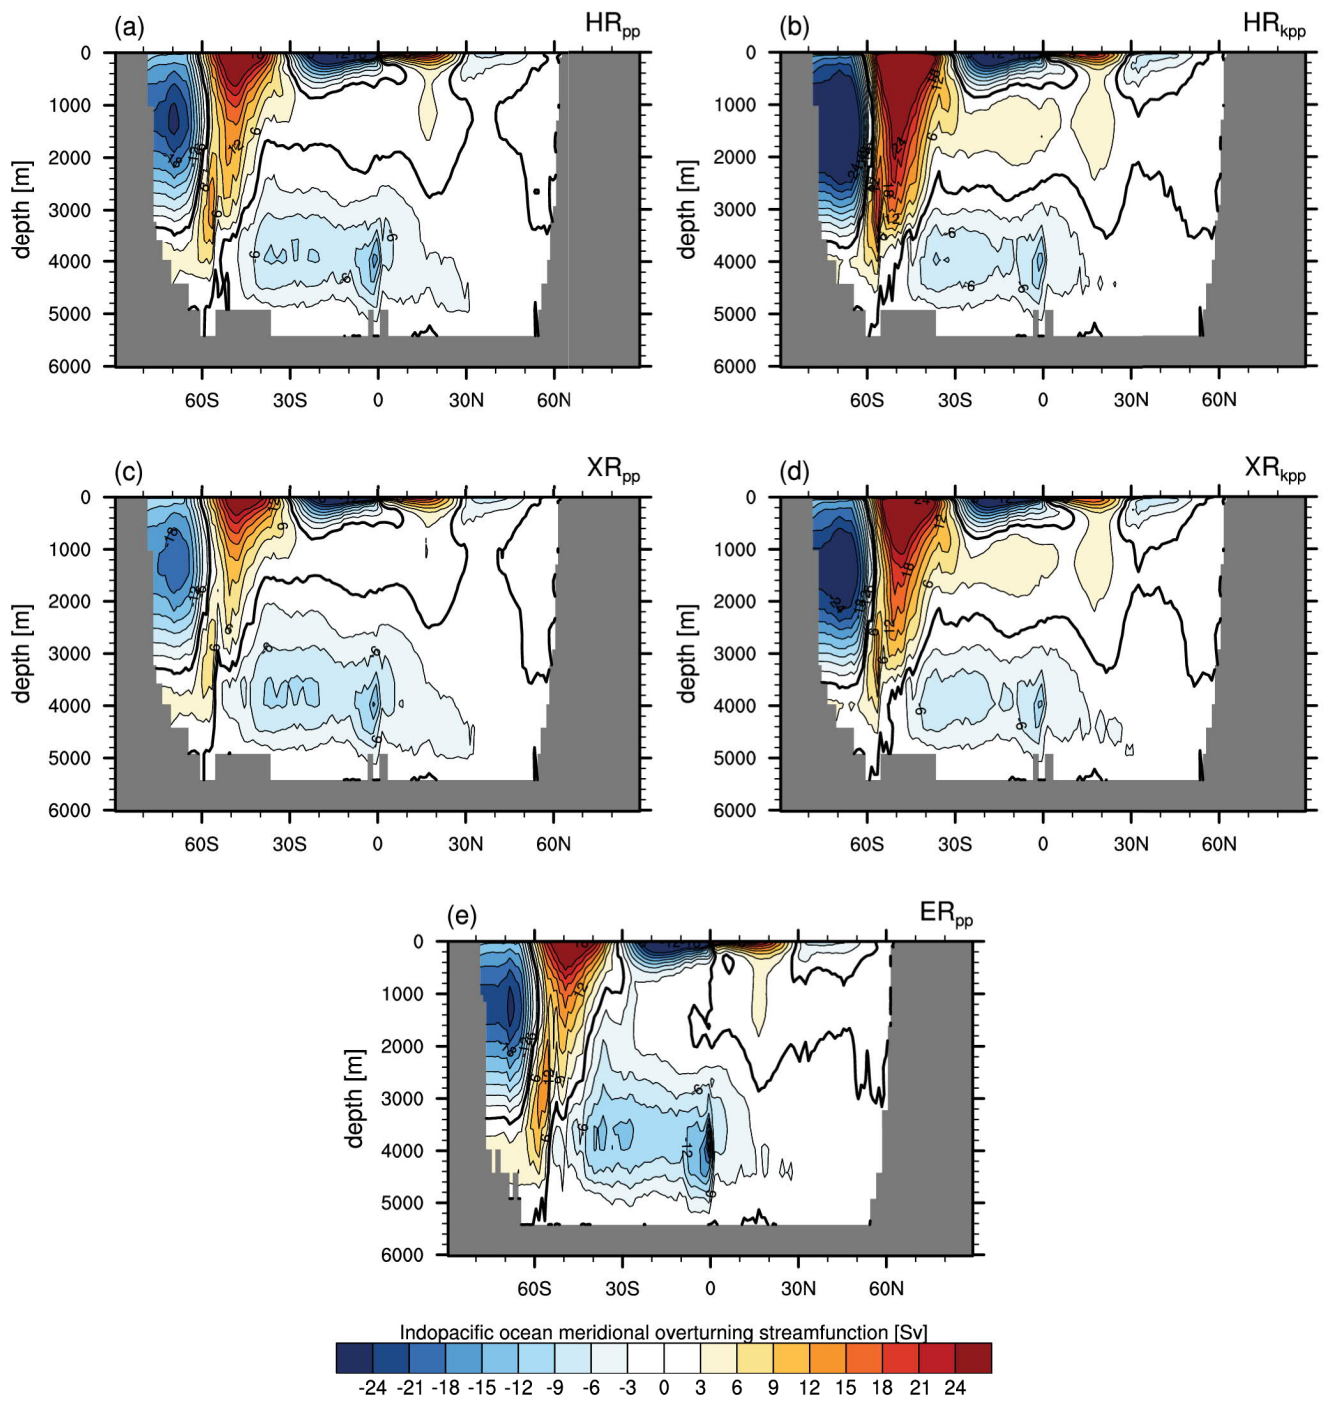

**Figure A4.** Eulerian stream function ( $Sv := 10^6 \text{ m}^3 \text{ s}^{-1}$ ) of the Pacific meridional overturning circulation for (a)  $HR_{pp}$ , (b)  $HR_{kpp}$ , (c)  $XR_{pp}$ , (d)  $XR_{kpp}$ , and (e)  $ER_{pp}$ . The zero contour is drawn as a thicker line.

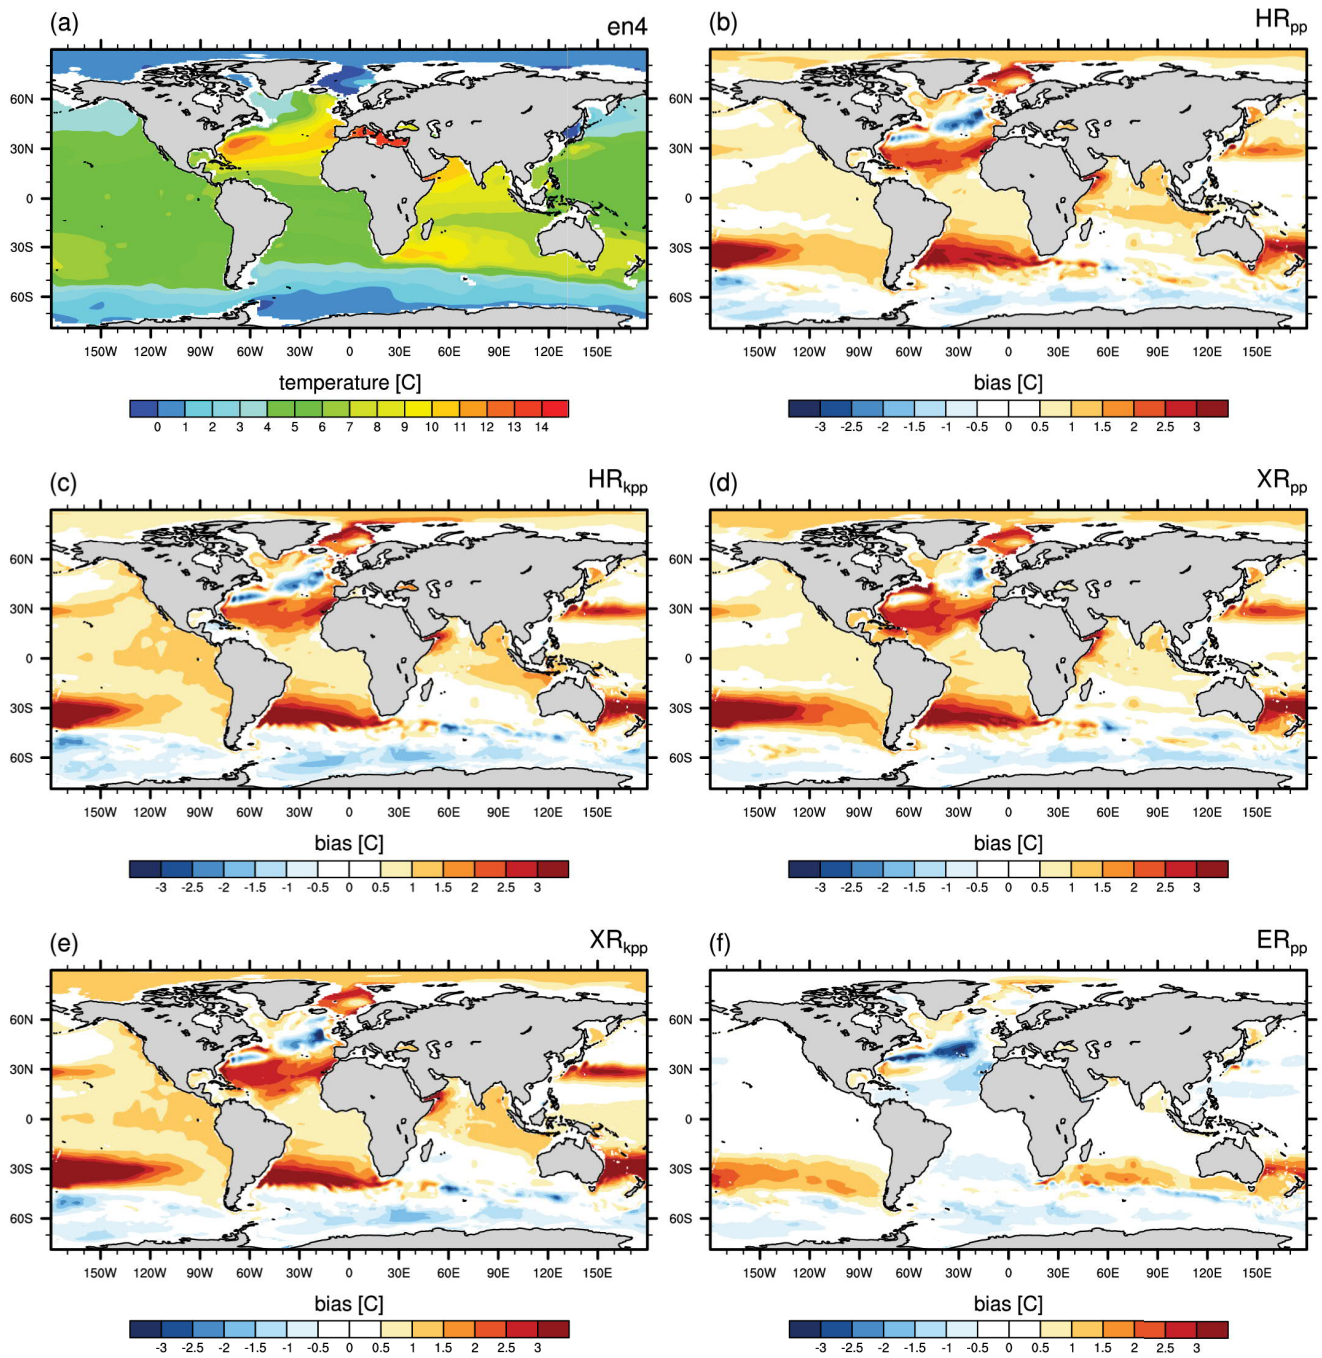

**Figure A5.** Sea water potential temperature ( $^{\circ}\text{C}$ ) at a depth of 740m from (a) EN4 (averaged over 1945–1955) and differences: MPI-ESM1.2 minus EN4 for (b) HR<sub>pp</sub>, (c) HR<sub>kpp</sub>, (d) XR<sub>pp</sub>, (e) XR<sub>kpp</sub>, and (f) ER<sub>pp</sub>.



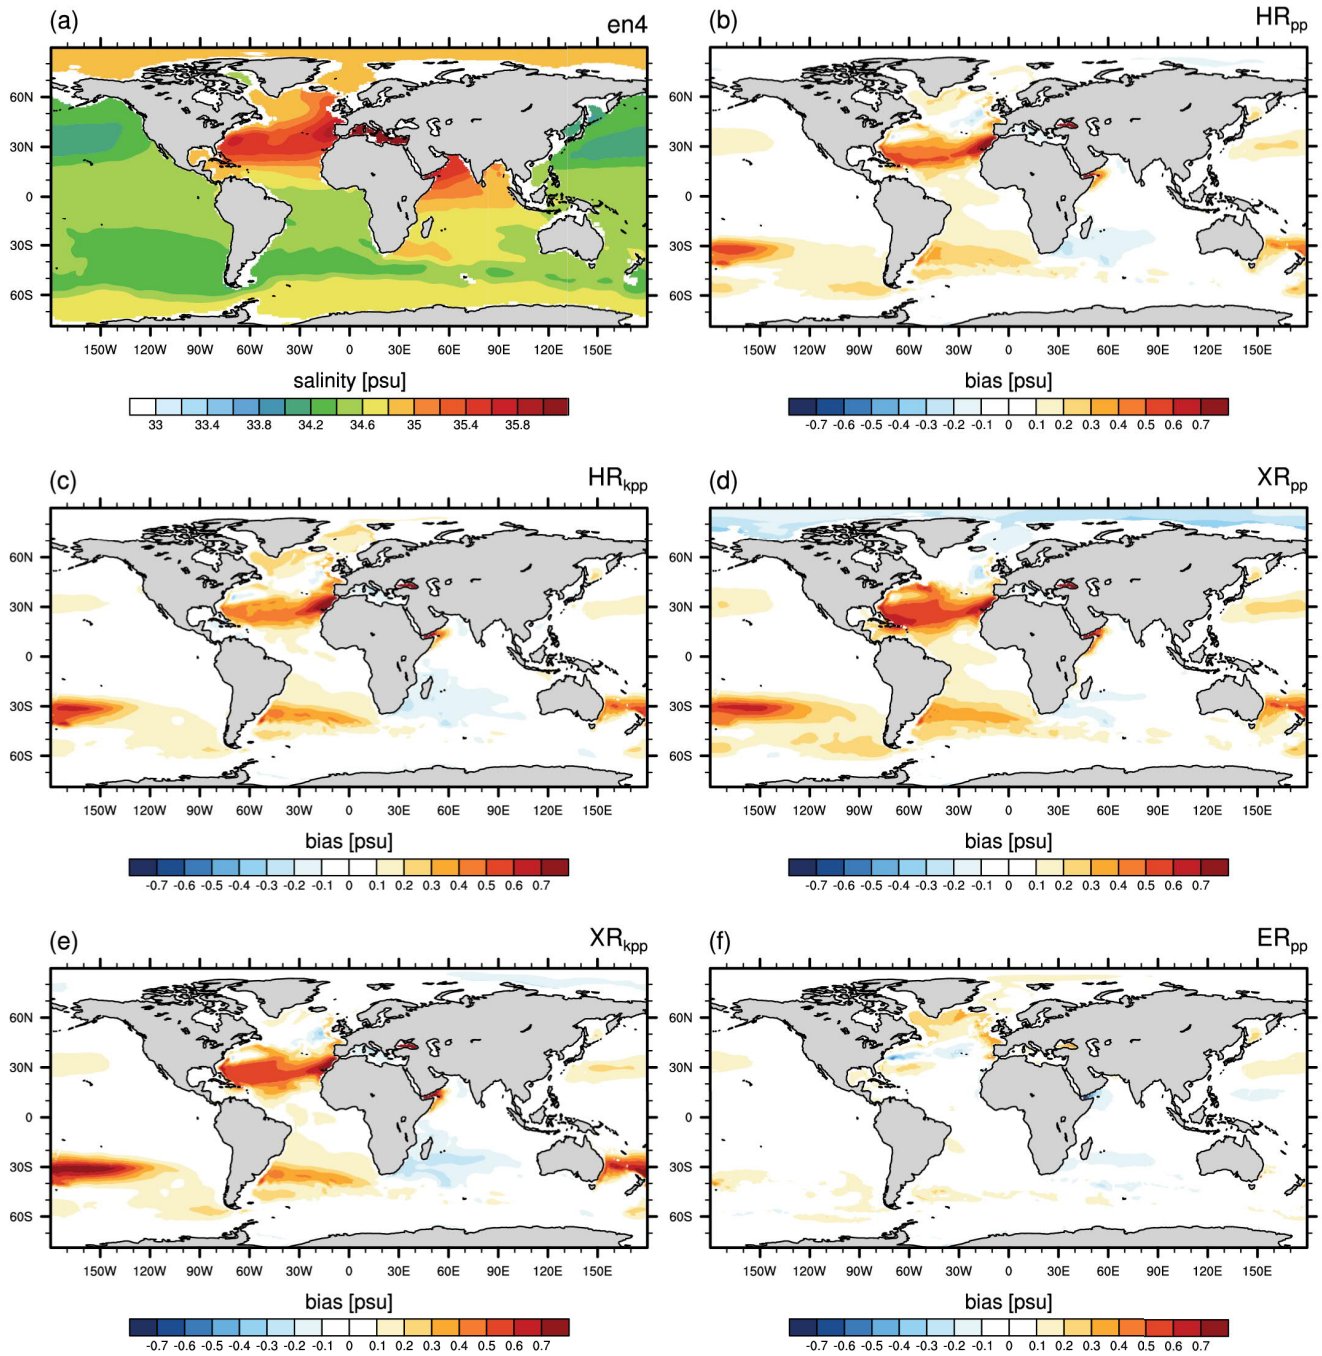

**Figure A6.** Sea water salinity (psu) at a depth of 740 m from (a) EN4 (averaged over 1945–1955) and differences: MPI-ESM1.2 minus EN4 for (b) HR<sub>pp</sub>, (c) HR<sub>kpp</sub>, (d) XR<sub>pp</sub>, (e) XR<sub>kpp</sub>, and (f) ER<sub>pp</sub>.

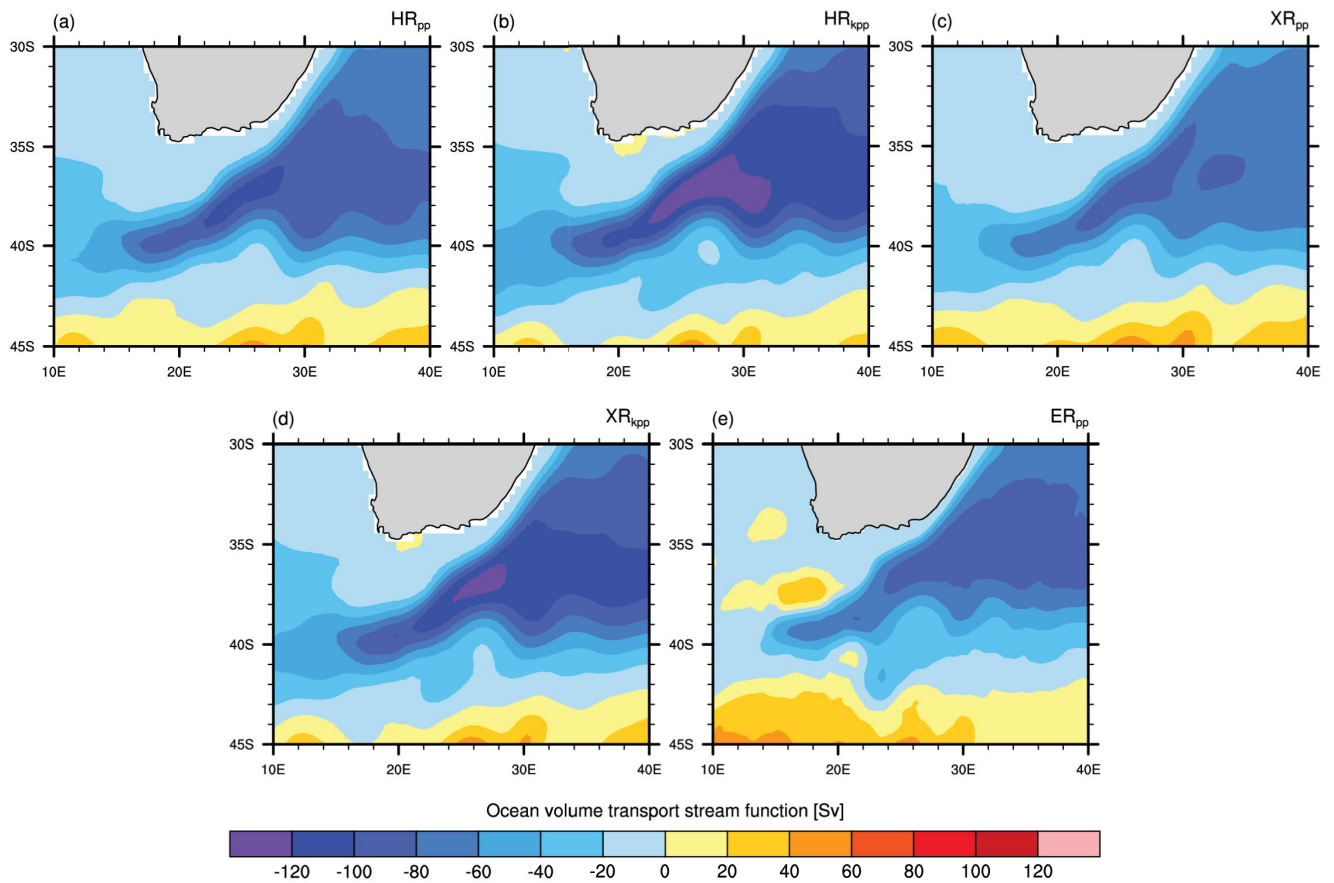

**Figure A7.** Time-averaged barotropic volume transport ( $S_V$ ) stream function of the Agulhas Current system simulated by (a)  $HR_{pp}$ , (b)  $HR_{kpp}$ , (c)  $XR_{pp}$ , (d)  $XR_{kpp}$ , and (e)  $ER_{pp}$ .

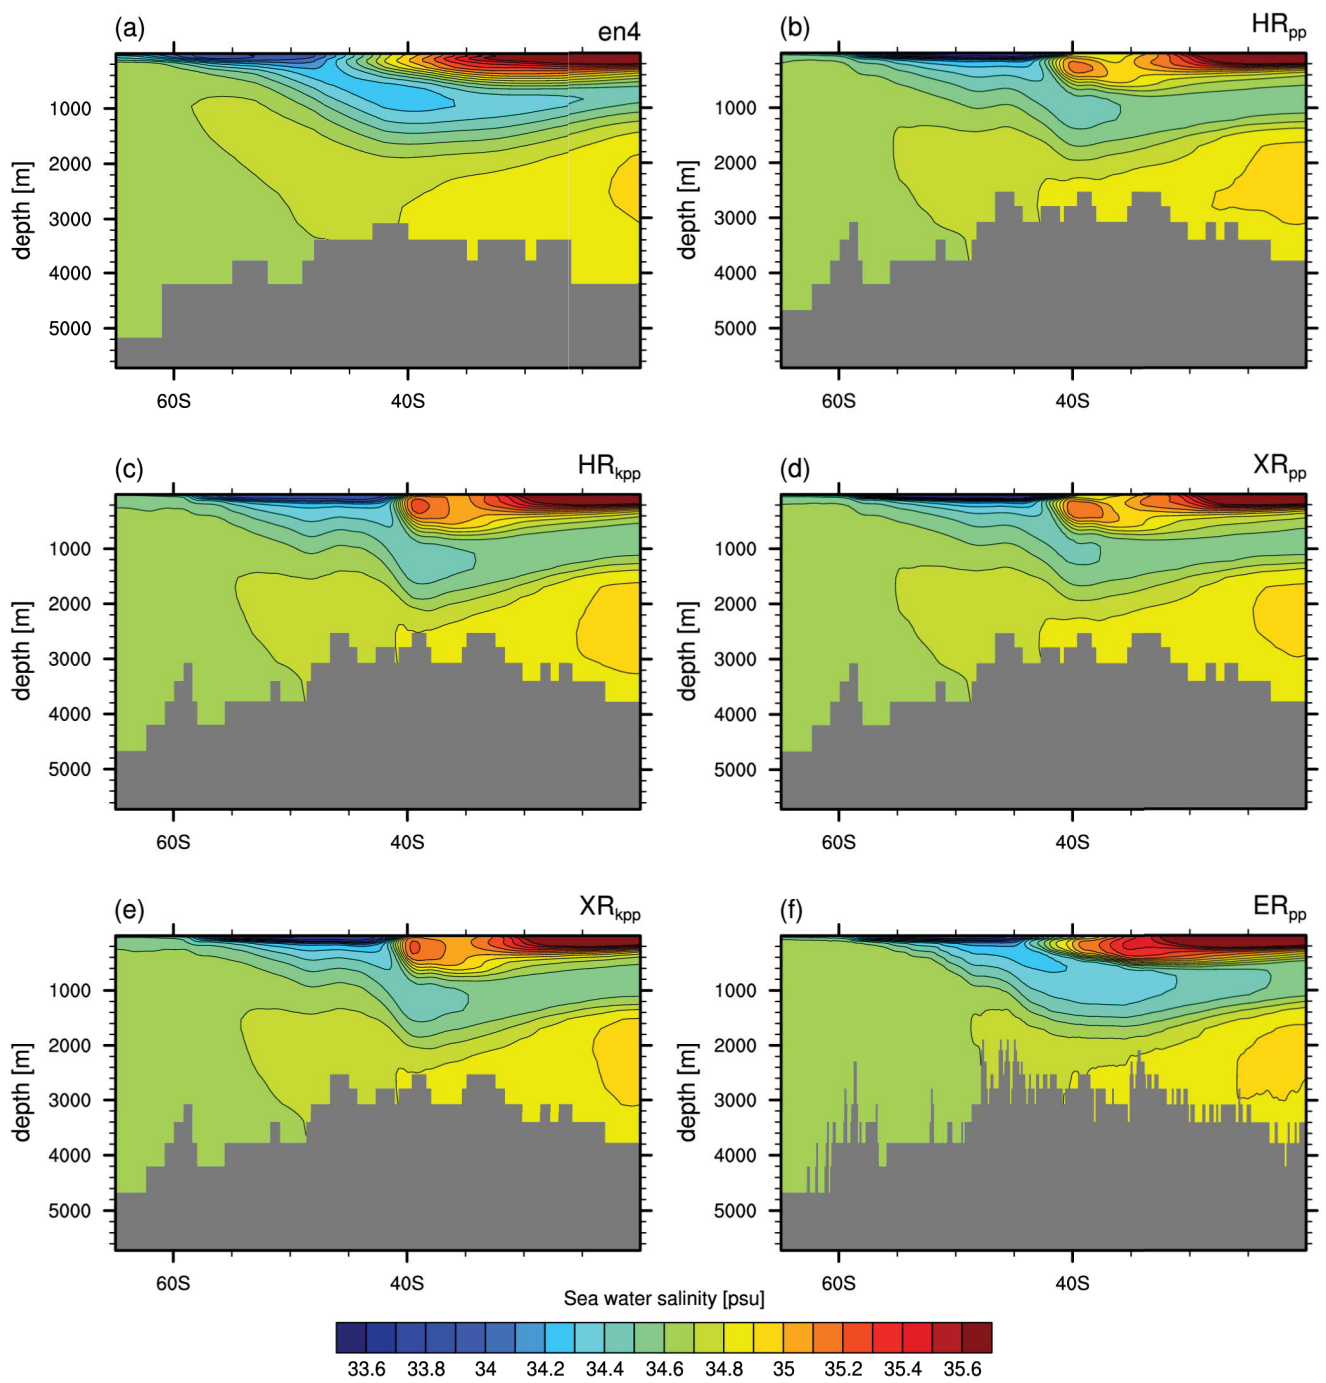

**Figure A8.** Time-averaged salinity section along 15°W (from 65°S to 20°S) in the Southern Ocean of (a) EN4 (1945-1955), (b) HR<sub>pp</sub>, (c) HR<sub>kpp</sub>, (d) XR<sub>pp</sub>, (e) XR<sub>kpp</sub>, and (f) ER<sub>pp</sub>.

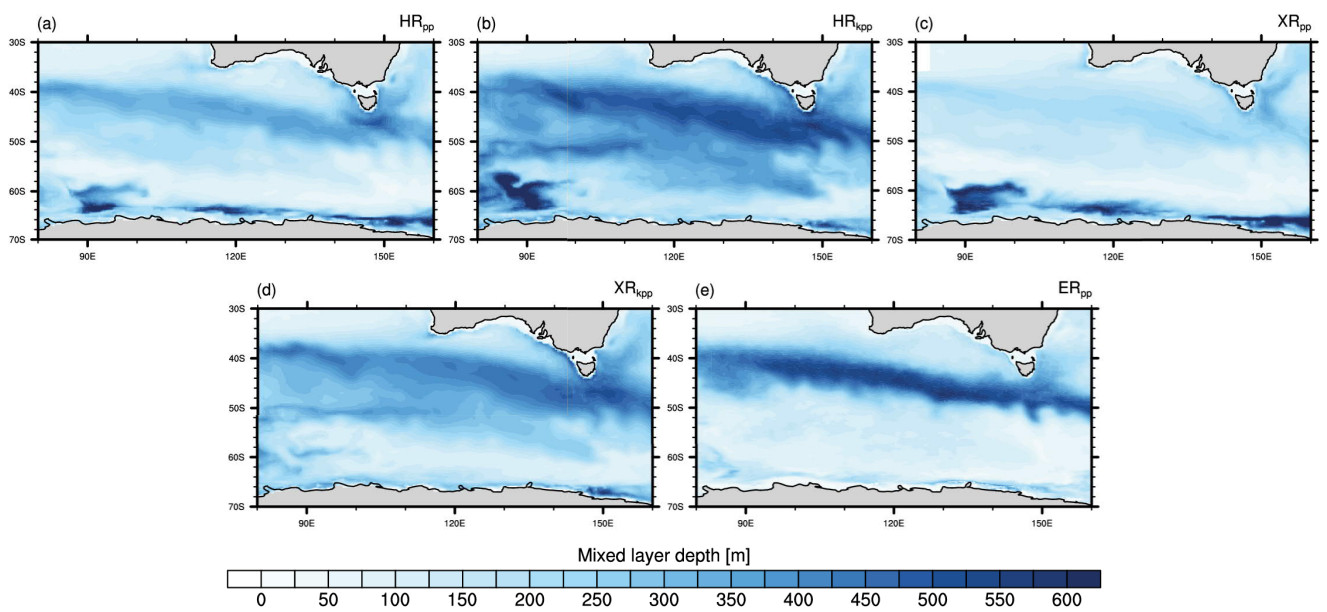

**Figure A9.** Time-averaged mixed layer depths ( $\sigma_t = 0.03 \text{ kg m}^{-3}$ ) across the Subantarctic Frontal zone in September simulated by (a) HR<sub>pp</sub>, (b) HR<sub>kpp</sub>, (c) XR<sub>pp</sub>, (d) XR<sub>kpp</sub>, and (e) ER<sub>pp</sub>.
